# Supplementary material for: Organocatalytic multicomponent synthesis of enantioenriched polycyclic 1,2,3,4-tetrahydropyridines: key substrate selection enabling regio- and stereoselectivities
Source: Royal Society of Chemistry journal article supplement (doi:10.1039/c4cc08469a), 2014-12-12
Supplement: c4cc08469a1.pdf [file c4cc08469a1.pdf]

## Supporting Information

### Organocatalytic Multicomponent Synthesis of Enantioenriched Polycyclic 1,2,3,4-Tetrahydropyridines: Key Substrate Selection Enabling Regio- and Stereoselectivities

Yohan Dudognon, Haiying Du, Jean Rodriguez, Xavier Bugaut, Thierry Constantieux

#### Table of Contents

|                                                                  |     |
|------------------------------------------------------------------|-----|
| 1. General considerations                                        | S2  |
| 2. Optimization of reaction conditions                           | S3  |
| 3. General procedure, synthesis and characterization of products | S6  |
| 4. Determination of absolute and relative configurations         | S19 |
| 5. <sup>1</sup> H and <sup>13</sup> C NMR spectra                | S26 |
| 6. HPLC traces                                                   | S43 |

## 1. GENERAL CONSIDERATIONS:

**General Procedures.** Analytical thin layer chromatography (TLC) was performed on silica gel 60 F254 aluminum plates (Macherey-Nagel) containing a 254 nm fluorescent indicator. TLC plates were visualized by exposure to short wave ultraviolet light (254 nm) and to anisaldehyde (2.5 mL of *p*-anisaldehyde, 3 mL of concentrated H<sub>2</sub>SO<sub>4</sub> and 1.5 mL of AcOH in 100 mL of EtOH) followed by heating. Flash column chromatography was performed using silica gel (35–70 μm, 60 Å, Acros).

**Starting Materials.** Unless specified, commercial reagents and solvents were used as received.

- β-Ketoamides were prepared according to known literature procedure.<sup>1</sup>
- (*E*)-Cinnamaldehyde was distilled just prior to use.
- Catalysts were purchased from Sigma-Aldrich.
- CH<sub>2</sub>Cl<sub>2</sub> were dried using a M-Braun SPS-800 system.

### Instrumentation.

- Proton nuclear magnetic resonance (<sup>1</sup>H NMR) spectra were recorded with a Bruker AV 400 spectrometer. Proton chemical shifts are reported in parts per million (δ scale), and are referenced using residual protium in the NMR solvent (CDCl<sub>3</sub>: δ 7.26 (CHCl<sub>3</sub>)). Data are reported as follows: chemical shift (multiplicity (s = singlet, br s = broad singlet, d = doublet, t = triplet, q = quadruplet, quint = quintuplet, sept = septuplet, m = multiplet), coupling constant(s) (Hz), integration).

- Carbon-13 nuclear magnetic resonance (<sup>13</sup>C NMR) spectra were recorded with Bruker AV 300 or AV 400 spectrometers. Carbon chemical shifts are reported in parts per million (δ scale), and are referenced using the carbon resonances of the solvent (δ 77.16 (CHCl<sub>3</sub>)). Data are reported as follows: chemical shift (CH<sub>n</sub> where n is the number of hydrogen atoms linked to the carbon atom).

- HPLC analyses for the determination of enantiomeric excesses were performed on a Merck-Hitachi system equipped with Chiralpak AD-H, Chiralcel OD-3, Chiralcel IF, Lux-Cellulose-4, Chiralpak IA, Chiralpak AZ-H, and Lux-Cellulose-2.

- Optical Rotations were recorded on a Anton Paar MCP 200 Polarimeter at 589 nm and 25 °C and specific rotations are reported as follows: specific rotation (concentration in grams/100 mL of solution, solvent).

- High resolution mass spectra (HRMS) were recorded on a Waters Synapt G2 HDMS apparatus using a positive electrospray (ESI) ionization source.

---

<sup>1</sup> H. Du, J. Rodriguez, X. Bugaut and T. Constantieux, *Chem. Eur. J.*, 2014, **20**, 8458-8466.

## 2. OPTIMIZATION OF REACTION CONDITIONS:

### 2.1 Selection of the functionalized amine and $\beta$ -dicarbonyl compound

Our initial screening aimed at determining which substrates (functionalized amine and  $\beta$ -dicarbonyl compound) would be suitable to selectively deliver product **B**.

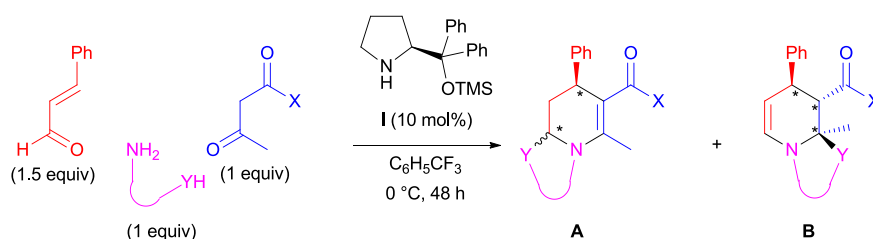

| Entry | X             | Functionalized amine | <b>A</b> ; <b>B</b> (yield, <i>dr</i> , <i>ee</i> )                                                    |
|-------|---------------|----------------------|--------------------------------------------------------------------------------------------------------|
| 1     | <i>Ot</i> -Bu |                      | complex mixture                                                                                        |
| 2     | <i>Ot</i> -Bu |                      | only <b>A</b> (27%, 1.3:1 <i>dr</i> , 88% <i>ee</i> )                                                  |
| 3     | <i>Ot</i> -Bu |                      | <b>A</b> (12%, 1.5:1 <i>dr</i> , n.d. <i>ee</i> );<br><b>B</b> (25%, >20:1 <i>dr</i> , 94% <i>ee</i> ) |
| 4     | <i>Ot</i> -Bu |                      | complex mixture                                                                                        |
| 5     | <i>Ot</i> -Bu |                      | only <b>A</b> (76%, 1.8:1 <i>dr</i> , 94% <i>ee</i> )                                                  |
| 6     | N(Me)OMe      |                      | only <b>B</b> (19%, >20:1 <i>dr</i> , n.d. <i>ee</i> )                                                 |
| 7     | N(Me)OMe      |                      | complex mixture                                                                                        |
| 8     | N(Me)OMe      |                      | complex mixture                                                                                        |

## 2.2 Solvents and ratio between the reactants

Having found suitable substrates for the selective formation of the 1,2,3,4-tetrahydropyridine regioisomers, we aimed to improve the yield. Changing for CH<sub>2</sub>Cl<sub>2</sub> as the solvent was beneficial but modifications of the ratio between the reactants to fight the competing formation of the imine were useless.

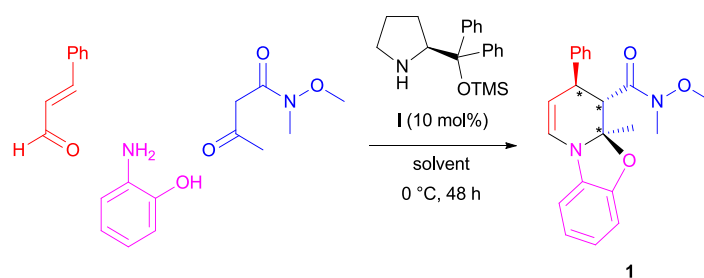

| Entry | Solvent                                       | $\beta$ -dicarbonyl/enal/<br>aminophenol | yield, <i>dr</i> , <i>ee</i>          |
|-------|-----------------------------------------------|------------------------------------------|---------------------------------------|
| 1     | C <sub>6</sub> H <sub>5</sub> CF <sub>3</sub> | 1:1.5:1                                  | 19%, >20:1 <i>dr</i> , n.d. <i>ee</i> |
| 2     | CH <sub>2</sub> Cl <sub>2</sub>               | 1:1.5:1                                  | 28%, >20:1 <i>dr</i> , 93% <i>ee</i>  |
| 3     | CH <sub>2</sub> Cl <sub>2</sub>               | 1:1.5:1.5                                | 23%, >20:1 <i>dr</i> , n.d. <i>ee</i> |
| 4     | CH <sub>2</sub> Cl <sub>2</sub>               | 1:3:3                                    | 30%, >20:1 <i>dr</i> , n.d. <i>ee</i> |

## 2.3 Catalysts, additives, temperature and reaction time

To improve the yield of product, different aminocatalysts and additives (acids and water) were evaluated, showing that a combination of catalyst I (20 mol%) and BzOH (40 mol%) was the best one. Reaction temperature and time were also optimized. To finish with, a two-fold excess of  $\beta$ -ketoamide had no noticeable impact on the reaction outcome.

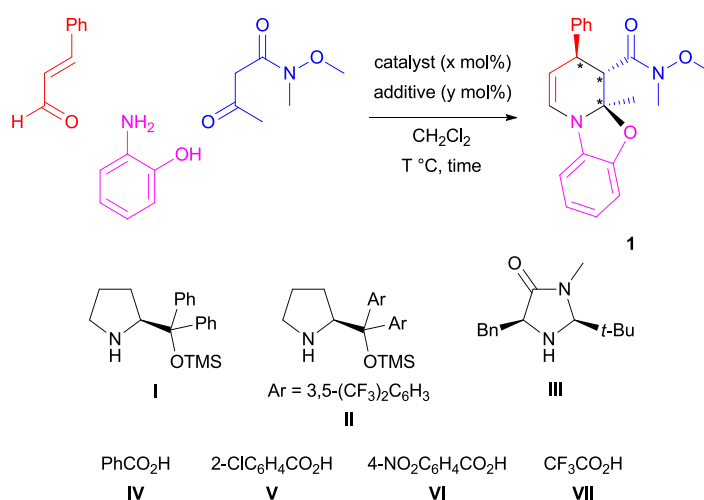

| Entry           | Catalyst<br>(x mol%) | Additive<br>(y mol%)                   | Temperature | Time | yield, <i>dr</i> , <i>ee</i>          |
|-----------------|----------------------|----------------------------------------|-------------|------|---------------------------------------|
| 1               | <b>I</b> (10 mol%)   | none                                   | 0 °C        | 48 h | 28%, >20:1 <i>dr</i> , 93% <i>ee</i>  |
| 2               | <b>I</b> (10 mol%)   | <b>IV</b> (20 mol%)                    | 0 °C        | 24 h | 32%, >20:1 <i>dr</i> , 95% <i>ee</i>  |
| 3               | <b>I</b> (20 mol%)   | <b>IV</b> (40 mol%)                    | 0 °C        | 24 h | 36%, >20:1 <i>dr</i> , n.d. <i>ee</i> |
| 4               | <b>I</b> (20 mol%)   | <b>IV</b> (40 mol%)                    | 0 °C        | 96 h | 52%, >20:1 <i>dr</i> , 95% <i>ee</i>  |
| 5               | <b>I</b> (20 mol%)   | <b>IV</b> (100 mol%)                   | 0 °C        | 96 h | 52%, >20:1 <i>dr</i> , n.d. <i>ee</i> |
| 6               | <b>I</b> (20 mol%)   | <b>IV</b> (40 mol%)                    | 10 °C       | 24 h | 36%, >20:1 <i>dr</i> , 94% <i>ee</i>  |
| 7               | <b>I</b> (20 mol%)   | <b>IV</b> (40 mol%)                    | 25 °C       | 48 h | 51%, >20:1 <i>dr</i> , 91% <i>ee</i>  |
| 8               | <b>I</b> (20 mol%)   | <b>IV</b> (40 mol%)                    | 10 °C       | 60 h | 60%, >20:1 <i>dr</i> , 94% <i>ee</i>  |
| 9               | <b>II</b> (20 mol%)  | <b>IV</b> (40 mol%)                    | 10 °C       | 24 h | 23%, >20:1 <i>dr</i> , n.d. <i>ee</i> |
| 10              | <b>III</b> (20 mol%) | <b>IV</b> (40 mol%)                    | 10 °C       | 24 h | 6%, >20:1 <i>dr</i> , n.d. <i>ee</i>  |
| 11              | <b>I</b> (20 mol%)   | <b>V</b> (40 mol%)                     | 10 °C       | 24 h | 28%, >20:1 <i>dr</i> , n.d. <i>ee</i> |
| 12              | <b>I</b> (20 mol%)   | <b>VI</b> (40 mol%)                    | 10 °C       | 60 h | 37%, >20:1 <i>dr</i> , n.d. <i>ee</i> |
| 13              | <b>I</b> (20 mol%)   | <b>V</b> (40 mol%)                     | 10 °C       | 60 h | 12%, >20:1 <i>dr</i> , n.d. <i>ee</i> |
| 14              | <b>I</b> (20 mol%)   | <b>IV</b> (40 mol%)<br>+water (0.1 mL) | 10 °C       | 60 h | 44%, >20:1 <i>dr</i> , 93% <i>ee</i>  |
| 15 <sup>a</sup> | <b>I</b> (20 mol%)   | <b>IV</b> (40 mol%)                    | 10 °C       | 60 h | 55%, >20:1 <i>dr</i> , 92% <i>ee</i>  |

<sup>a</sup>Two equivalent of  $\beta$ -ketoamide were used.

### 3. GENERAL PROCEDURE, SYNTHESIS AND CHARACTERIZATION OF PRODUCTS:

#### 3.1 General procedure for the three-component reactions:

$\beta$ -ketoamides (0.2 mmol, 1 equiv), cinnamaldehyde derivatives (0.3 mmol, 1.5 equiv), aminophenol substrates (0.2 mmol, 1equiv) and benzoic acid (0.08 mmol, 0.4 equiv) were dissolved in 2 mL of dry dichloromethane under argon and placed at 10 °C. Then, the Hayashi-Jørgensen catalyst (0.04 mmol, 0.2 equiv) was added to the mixture. After 60 h, around ten drops of  $\text{NH}_4\text{Cl}$  were added to the reaction mixture to deactivate the catalyst. The organic phase was then separated and concentrated under vacuum. The diastereomeric ratio of the crude product was determined by  $^1\text{H}$  NMR. Purification over silica gel (dichloromethane/ethyl acetate 100:0.5 (unless specified otherwise)) directly yielded the corresponding three-component product.

#### (3*R*,4*S*,4*aR*)-*N*-methoxy-*N*,4*a*-dimethyl-3-phenyl-4,4*a*-dihydro-3*H*-benzo [4,5]oxazolo [3,2-*a*]pyridine-4-carboxamide 1

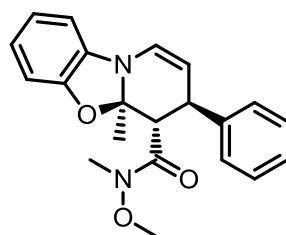

60% yield, dr > 20:1, 94% *ee*

According to the general procedure for the three-component reactions and starting from *N*-methoxy-*N*-methyl-3-oxobutanamide (29.0 mg, 0.200 mmol, 1 equiv), (*2E*)-cinnamaldehyde (39.7 mg, 0.300 mmol, 1.5 equiv), 2-aminophenol (21.8 mg, 0.200 mmol, 1 equiv), benzoic acid (9.8 mg, 0.080 mmol, 0.4 equiv) and the catalyst (13.0 mg, 0.040 mmol, 0.2 equiv). The product **1** was isolated as an orange solid (42.0 mg, 0.120 mmol, 60% yield, 94% *ee*, dr > 20:1).

**TLC (DCM/EtOAc 100:0.5)** *R*<sub>f</sub> 0.35 (UV, *p*-anisaldehyde).

**$^1\text{H}$  NMR (400 MHz,  $\text{CDCl}_3$ )**  $\delta$  (ppm) 7.40 – 7.28 (m, 5H), 6.97 – 6.92 (m, 1H), 6.84 – 6.69 (m, 4H), 5.05 (dd, *J* = 7.6, 1.9 Hz, 1H), 4.12 (d, *J* = 11.5 Hz, 1H), 3.76 (d, *J* = 11.5 Hz, 1H), 3.37 (s, 3H), 3.12 (s, 3H), 1.87 (s, 3H).

**$^{13}\text{C}$  NMR (101 MHz,  $\text{CDCl}_3$ )**  $\delta$  (ppm) 171.3 (C), 149.5 (C), 142.0 (C), 134.7 (C), 128.5 (2 CH), 128.2 (2 CH), 127.2 (CH), 123.9 (CH), 121.5 (CH), 119.9 (CH), 108.5 (CH), 107.3 (CH), 106.7 (CH), 100.7 (C), 61.1 ( $\text{CH}_3$ ), 48.8 (CH), 43.2 (CH), 32.1 ( $\text{CH}_3$ ), 20.9 ( $\text{CH}_3$ ).

**HRMS (ESI)** calc'd for  $[\text{C}_{21}\text{H}_{22}\text{N}_2\text{O}_3+\text{H}]^+$ : 351.1703, found: 351.1703.

**HPLC** Chiralpak AZ-H, Heptane/Isopropanol 90:10, 1 mL/min,  $\lambda$  = 254 nm,  $\tau_{\text{minor}}$  = 7.53 min  
 $\tau_{\text{major}}$  = 8.36 min.

**$[\alpha]_{\text{D}}^{20}$**  = 151 (c 0.100,  $\text{CHCl}_3$ ).

**m.p.** = 72-73 °C.

**(3*R*,4*S*,4*aR*)-*N*-methoxy-3-(4-methoxyphenyl)-*N*,4*a*-dimethyl-4,4*a*-dihydro-3*H*-benzo[4,5]oxazolo[3,2-*a*]pyridine-4-carboxamide 2**

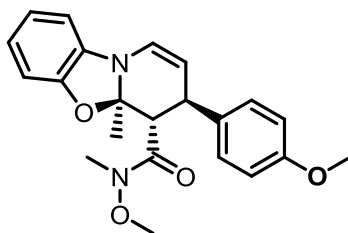

41% yield, dr > 20:1, 82% ee

According to the general procedure for the three-component reactions and starting from *N*-methoxy-*N*-methyl-3-oxobutanamide (29.0 mg, 0.200 mmol, 1 equiv), *trans*-4-methoxycinnamaldehyde (48.7 mg, 0.300 mmol, 1.5 equiv), 2-aminophenol (21.8 mg, 0.200 mmol, 1 equiv), benzoic acid (9.8 mg, 0.080 mmol, 0.4 equiv) and the catalyst (13.0 mg, 0.040 mmol, 0.2 equiv). The product **2** was isolated as an orange oil (31.0 mg, 0.081 mmol, 41% yield, 82% *ee*, dr > 20:1).

**TLC (DCM/EtOAc 100:0.5)** R<sub>f</sub> 0.35 (UV, *p*-anisaldehyde).

**<sup>1</sup>H NMR (400 MHz, CDCl<sub>3</sub>)** δ (ppm) 7.16 (d, *J* = 8.6 Hz, 2H), 6.83 (td, *J* = 7.4, 2.2 Hz, 1H), 6.78 (d, *J* = 8.7 Hz, 2H), 6.71 – 6.63 (m, 3H), 6.60 (dd, *J* = 7.7, 1.9 Hz, 1H), 4.90 (dd, *J* = 7.6, 1.7 Hz, 1H), 3.96 (d, *J* = 11.7 Hz, 1H), 3.76 (s, 3H), 3.61 (d, *J* = 11.5 Hz, 1H), 3.29 (s, 3H), 3.02 (s, 3H), 1.74 (s, 3H).

**<sup>13</sup>C NMR (101 MHz, CDCl<sub>3</sub>)** δ (ppm) 171.3 (C), 158.6 (C), 149.4 (C), 134.6 (C), 133.8 (C), 129.1 (2 CH), 123.6 (CH), 121.3 (CH), 119.8 (CH), 113.7 (2 CH), 108.4 (CH), 107.6 (CH), 106.6 (CH), 100.6 (C), 61.1 (CH<sub>3</sub>), 55.2 (CH<sub>3</sub>), 48.8 (CH), 42.3 (CH), 32.0 (CH<sub>3</sub>), 20.9 (CH<sub>3</sub>).

**HRMS (ESI)** calc'd for [C<sub>22</sub>H<sub>24</sub>N<sub>2</sub>O<sub>4</sub>+H]<sup>+</sup>: 381.1809, found: 381.1808.

**HPLC** Chiralpak AD-H, Heptane/Isopropanol 90:10, 1 mL/min, λ = 254 nm, τ<sub>minor</sub> = 6.32 min  
τ<sub>major</sub> = 8.27 min.

[α]<sub>D</sub><sup>25</sup> = 33.9 (c 0.065, CHCl<sub>3</sub>).

**(3*R*,4*S*,4*aR*)-3-(4-fluorophenyl)-*N*-methoxy-*N*,4*a*-dimethyl-4,4*a*-dihydro-3*H*-benzo[4,5]oxazolo[3,2-*a*]pyridine-4-carboxamide 3**

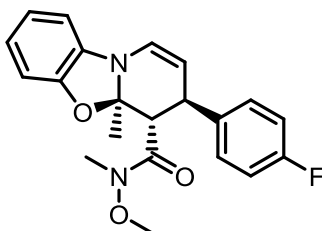

45% yield, dr > 20:1, 86% ee

According to the general procedure for the three-component reactions and starting from *N*-methoxy-*N*-methyl-3-oxobutanamide (29.0 mg, 0.200 mmol, 1 equiv), (*2E*)-3-(4-fluorophenyl)prop-2-enal (45.0 mg, 0.300 mmol, 1.5 equiv), 2-aminophenol (21.8 mg, 0.200

mmol, 1 equiv), benzoic acid (9.8 mg, 0.080 mmol, 0.4 equiv) and the catalyst (13.0 mg, 0.040 mmol, 0.2 equiv). The product **3** was isolated as an orange oil (33.0 mg, 0.090 mmol, 45% yield, 86% *ee*, *dr* > 20:1).

**TLC (DCM/EtOAc 100:0.5)** *R<sub>f</sub>* 0.43 (UV, *p*-anisaldehyde).

**<sup>1</sup>H NMR (400 MHz, CDCl<sub>3</sub>)** δ (ppm) 7.22 (dd, *J* = 8.4, 5.6 Hz, 2H), 6.93 (t, *J* = 8.7 Hz, 2H), 6.83 (td, *J* = 7.3, 1.7 Hz, 1H), 6.72 – 6.60 (m, 4H), 4.88 (dd, *J* = 7.6, 1.8 Hz, 1H), 3.99 (d, *J* = 11.6 Hz, 1H), 3.60 (d, *J* = 11.6 Hz, 1H), 3.32 (s, 3H), 3.01 (s, 3H), 1.74 (s, 3H).

**<sup>13</sup>C NMR (101 MHz, CDCl<sub>3</sub>)** δ (ppm) 171.2 (C), 162.0 (d, <sup>1</sup>*J*<sub>CF</sub> = 245.0 Hz, CF), 149.5 (C), 137.6 (d, <sup>4</sup>*J*<sub>CF</sub> = 3.1 Hz, C), 134.5 (C), 129.8 (d, <sup>3</sup>*J*<sub>CF</sub> = 8.1 Hz, 2 CH), 124.0 (CH), 121.5 (CH), 120.1 (CH), 115.4 (d, <sup>2</sup>*J*<sub>CF</sub> = 21.3 Hz, 2 CH), 108.6 (CH), 106.9 (CH), 106.8 (CH), 100.6 (C), 61.1 (CH<sub>3</sub>), 48.9 (CH), 42.5 (CH), 32.1 (CH<sub>3</sub>), 20.9 (CH<sub>3</sub>).

**HRMS (ESI)** calc'd for [C<sub>21</sub>H<sub>21</sub>N<sub>2</sub>O<sub>3</sub>F + H]<sup>+</sup>: 369.1609, found: 369.1606.

**HPLC** Chiralpak IF, Heptane/Isopropanol 95:5, 1 mL/min, λ = 254 nm, τ<sub>minor</sub> = 6.63 min  
τ<sub>major</sub> = 7.37 min.

[α]<sub>D</sub><sup>25</sup> = 186 (c 0.115, CHCl<sub>3</sub>).

**(3*R*,4*S*,4*aR*)-3-(4-chlorophenyl)-*N*-methoxy-*N*,4*a*-dimethyl-4,4*a*-dihydro-3*H*-benzo[4,5]oxazolo[3,2-*a*]pyridine-4-carboxamide **4****

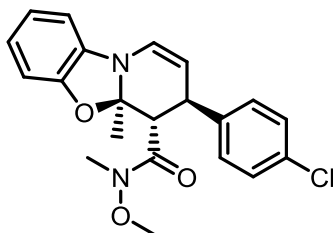

48% yield, *dr* > 20:1, 90% *ee*

According to the general procedure for the three-component reactions and starting from *N*-methoxy-*N*-methyl-3-oxobutanamide (29.0 mg, 0.200 mmol, 1 equiv), (*2E*)-3-(4-chlorophenyl)prop-2-enal (50.0 mg, 0.300 mmol, 1.5 equiv), 2-aminophenol (21.8 mg, 0.200 mmol, 1 equiv), benzoic acid (9.8 mg, 0.080 mmol, 0.4 equiv) and the catalyst (13.0 mg, 0.040 mmol, 0.2 equiv). The product **4** was isolated as a brown oil (37.0 mg, 0.096 mmol, 48% yield, 90% *ee*, *dr* > 20:1).

**TLC (DCM/EtOAc 100:0.5)** *R<sub>f</sub>* 0.45 (UV, *p*-anisaldehyde).

**<sup>1</sup>H NMR (400 MHz, CDCl<sub>3</sub>)** δ (ppm) 7.21 – 7.15 (m, 4H), 6.83 (td, *J* = 7.4, 1.4 Hz, 1H), 6.74 – 6.60 (m, 4H), 4.86 (dd, *J* = 7.6, 1.5 Hz, 1H), 3.99 (d, *J* = 11.6 Hz, 1H), 3.61 (d, *J* = 11.6 Hz, 1H), 3.34 (s, 3H), 3.02 (s, 3H), 1.73 (s, 3H).

**<sup>13</sup>C NMR (101 MHz, CDCl<sub>3</sub>)** δ (ppm) 170.9 (C), 149.3 (C), 140.5 (C), 134.3 (C), 132.7 (C), 129.5 (2 CH), 128.5 (2 CH), 124.1 (CH), 121.4 (CH), 120.0 (CH), 108.5 (CH), 106.7 (CH), 106.4 (CH), 100.4 (C), 61.1 (CH<sub>3</sub>), 48.5 (CH), 42.5 (CH), 32.1 (CH<sub>3</sub>), 20.8 (CH<sub>3</sub>).

**HRMS (ESI)** calc'd for [C<sub>21</sub>H<sub>21</sub>ClN<sub>2</sub>O<sub>3</sub> + H]<sup>+</sup>: 430.1164, found: 430.1163.



**HPLC** Chiralpak AZ-H, Heptane/Isopropanol 90:10, 1 mL/min,  $\lambda = 254$  nm,  $\tau_{\text{minor}} = 6.23$  min  
 $\tau_{\text{major}} = 7.29$  min.  
 $[\alpha]_{\text{D}}^{25} = 56.0$  (c 0.220,  $\text{CHCl}_3$ ).

**(3*R*,4*S*,4*aR*)-*N*-methoxy-*N*,4*a*-dimethyl-3-(4-nitrophenyl)-4,4*a*-dihydro-3*H*-benzo[4,5]oxazolo[3,2-*a*]pyridine-4-carboxamide 5**

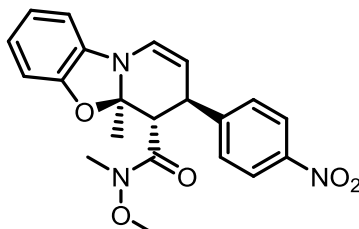

50% yield, dr > 20:1, 94% *ee*

According to the general procedure for the three-component reactions and starting from *N*-methoxy-*N*-methyl-3-oxobutanamide (29.0 mg, 0.200 mmol, 1 equiv), (*2E*)-3-(4-nitrophenyl)prop-2-enal (53.1 mg, 0.300 mmol, 1.5 equiv), 2-aminophenol (21.8 mg, 0.200 mmol, 1 equiv), benzoic acid (9.8 mg, 0.080 mmol, 0.4 equiv) and the catalyst (13.0 mg, 0.040 mmol, 0.2 equiv). The product **5** was isolated as an orange solid (39.5 mg, 0.100 mmol, 50% yield, 94% *ee*, dr > 20:1).

**TLC (DCM/EtOAc 100:0.5)**  $R_f$  0.37 (UV, *p*-anisaldehyde).

**$^1\text{H}$  NMR (400 MHz,  $\text{CDCl}_3$ )**  $\delta$ (ppm) 8.13 (d,  $J = 8.6$  Hz, 2H), 7.46 (d,  $J = 8.5$  Hz, 2H), 6.88 (t,  $J = 7.4$  Hz, 1H), 6.72 (m, 4H), 4.88 (d,  $J = 7.6$  Hz, 1H), 4.16 (d,  $J = 11.6$  Hz, 1H), 3.67 (d,  $J = 11.7$  Hz, 1H), 3.41 (s, 3H), 3.02 (s, 3H), 1.76 (s, 3H).

**$^{13}\text{C}$  NMR (101 MHz,  $\text{CDCl}_3$ )**  $\delta$  (ppm) 170.5 (C), 150.0 (C), 149.2 (C), 147.2 (C), 134.1 (C), 129.1 (2 CH), 124.7 (CH), 123.6 (2 CH), 121.6 (CH), 120.3 (CH), 108.6 (CH), 106.9 (CH), 104.9 (CH), 100.2 (C), 61.1 ( $\text{CH}_3$ ), 48.3 (CH), 43.0 (CH), 32.1 ( $\text{CH}_3$ ), 20.8 ( $\text{CH}_3$ ).

**HRMS (ESI)** calc'd for  $[\text{C}_{21}\text{H}_{21}\text{N}_3\text{O}_5+\text{H}]^+$ : 396.1554, found: 396.1552.

**HPLC** Chiralpak AD-H, Heptane/Isopropanol 80:20, 1 mL/min,  $\lambda = 254$  nm,  $\tau_{\text{minor}} = 7.42$  min  
 $\tau_{\text{major}} = 12.00$  min.

$[\alpha]_{\text{D}}^{25} = 137$  (c 0.080,  $\text{CHCl}_3$ ).

**m.p.** = 74-75 °C.

**(3*R*,4*S*,4*aR*)-3-(3-chlorophenyl)-*N*-methoxy-*N*,4*a*-dimethyl-4,4*a*-dihydro-3*H*-benzo[4,5]oxazolo[3,2-*a*]pyridine-4-carboxamide 6**

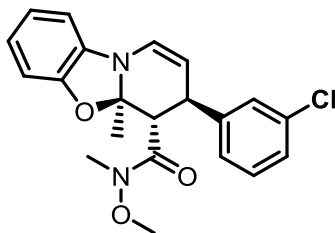

49% yield, dr > 20:1, 94% *ee*

According to the general procedure for the three-component reactions and starting from *N*-methoxy-*N*-methyl-3-oxobutanamide (29.0 mg, 0.200 mmol, 1 equiv), (2*E*)-3-(3-chlorophenyl)prop-2-enal (50.0 mg, 0.300 mmol, 1.5 equiv), 2-aminophenol (21.8 mg, 0.200 mmol, 1 equiv), benzoic acid (9.8 mg, 0.080 mmol, 0.4 equiv) and the catalyst (13.0 mg, 0.040 mmol, 0.2 equiv). The product **6** was isolated as an orange oil (38.0 mg, 0.099 mmol, 49% yield, 94% *ee*, dr > 20:1).

**TLC (DCM/EtOAc 100:0.5)** R<sub>f</sub> 0.35 (UV, *p*-anisaldehyde).

**<sup>1</sup>H NMR (400 MHz, CDCl<sub>3</sub>)** δ 7.26 (s, 1H), 7.20 – 7.11 (m, 3H), 6.83 (dd, *J* = 7.1, 2.1 Hz, 1H), 6.72 – 6.61 (m, 4H), 4.88 (dd, *J* = 7.6, 1.8 Hz, 1H), 3.99 (d, *J* = 11.6 Hz, 1H), 3.62 (d, *J* = 11.6 Hz, 1H), 3.33 (s, 3H), 3.03 (s, 3H), 1.74 (s, 3H).

**<sup>13</sup>C NMR (101 MHz, CDCl<sub>3</sub>)** δ 171.1 (C), 149.4 (C), 144.2 (C), 134.4 (C), 134.3 (C), 129.7 (CH), 128.1 (CH), 127.4 (CH), 126.6 (CH), 124.3 (CH), 121.6 (CH), 120.1 (CH), 108.6 (CH), 106.8 (CH), 106.2 (CH), 100.5 (C), 612.2 (CH<sub>3</sub>), 48.6 (CH), 42.9 (CH), 32.2 (CH<sub>3</sub>), 20.9 (CH<sub>3</sub>).

**HRMS (ESI)** calc'd for [C<sub>21</sub>H<sub>21</sub>N<sub>2</sub>O<sub>3</sub>Cl+H]<sup>+</sup>: 385.1313, found: 385.1313.

**HPLC** Chiralpak ID, Heptane/Ethanol 95:5, 1 mL/min, λ = 254 nm, τ<sub>minor</sub> = 6.34 min τ<sub>major</sub> = 7.38 min.

[α]<sub>D</sub><sup>20</sup> = 124 (c 0.100, CHCl<sub>3</sub>).

**(3*R*,4*S*,4*aR*)-8-chloro-*N*-methoxy-*N*,4*a*-dimethyl-3-(4-nitrophenyl)-4,4*a*-dihydro-3*H*-benzo[4,5]oxazolo[3,2-*a*]pyridine-4-carboxamide 7**

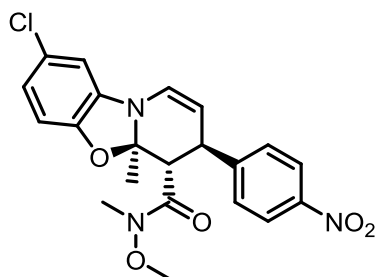

43% yield, dr > 20:1, 90% *ee*

According to the general procedure for the three-component reactions and starting from *N*-methoxy-*N*-methyl-3-oxobutanamide (29.0 mg, 0.200 mmol, 1 equiv), (2*E*)-3-(4-

nitrophenyl)prop-2-enal (53.1 mg, 0.300 mmol, 1.5 equiv), 2-amino-4-chlorophenol (28.7 mg, 0.200 mmol, 1 equiv), benzoic acid (9.8 mg, 0.080 mmol, 0.4 equiv) and the catalyst (13.0 mg, 0.040 mmol, 0.2 equiv). The product **7** was isolated as an orange solid (37.0 mg, 0.086 mmol, 43% yield, 90% *ee*, *dr* > 20:1).

**TLC (DCM/EtOAc 100:0.5)** *R<sub>f</sub>* 0.29 (UV, *p*-anisaldehyde).

**<sup>1</sup>H NMR (400 MHz, CDCl<sub>3</sub>)** δ (ppm) 8.12 (d, *J* = 8.6 Hz, 2H), 7.43 (d, *J* = 8.5 Hz, 2H), 6.69 – 6.54 (m, 4H), 4.92 (dd, *J* = 7.6, 1.6 Hz, 1H), 4.13 (d, *J* = 11.7 Hz, 1H), 3.63 (d, *J* = 11.7 Hz, 1H), 3.35 (s, 3H), 3.00 (s, 3H), 1.74 (s, 3H).

**<sup>13</sup>C NMR (101 MHz, CDCl<sub>3</sub>)** δ (ppm) 170.1 (C), 149.5 (C), 148.0 (C), 147.2 (C), 135.2 (C), 129.1 (2 CH), 126.6 (C), 124.2 (CH), 123.7 (2 CH), 119.6 (CH), 108.9 (CH), 107.4 (CH), 106.3 (CH), 101.3 (C), 61.1 (CH<sub>3</sub>), 48.3 (CH), 43.0 (CH), 32.1 (CH<sub>3</sub>), 20.7 (CH<sub>3</sub>).

**HRMS (ESI)** calc'd for [C<sub>21</sub>H<sub>20</sub>N<sub>3</sub>O<sub>5</sub>Cl+Na]<sup>+</sup>: 452.0984, found: 452.0984.

**HPLC** Chiralcel OD-3, Heptane/Isopropanol 80:20, 1 mL/min, λ = 254 nm, τ<sub>minor</sub> = 6.87 min  
τ<sub>major</sub> = 13.51 min.

[α]<sub>D</sub><sup>25</sup> = 218 (c 0.095, CHCl<sub>3</sub>).

**m.p.** = 85-87 °C.

**(3*R*,4*S*,4*aR*)-7-chloro-*N*-methoxy-*N*,4*a*-dimethyl-3-(4-nitrophenyl)-4,4*a*-dihydro-3*H*-benzo[4,5]oxazolo[3,2-*a*]pyridine-4-carboxamide **8****

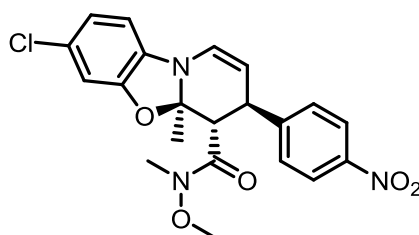

41% yield, *dr* > 20:1, 92% *ee*

According to the general procedure for the three-component reactions and starting from *N*-methoxy-*N*-methyl-3-oxobutanamide (29.0 mg, 0.200 mmol, 1 equiv), (*2E*)-3-(4-nitrophenyl)prop-2-enal (53.1 mg, 0.300 mmol, 1.5 equiv), 2-amino-5-chlorophenol (28.7 mg, 0.200 mmol, 1 equiv), benzoic acid (9.8 mg, 0.080 mmol, 0.4 equiv) and the catalyst (13.0 mg, 0.040 mmol, 0.2 equiv). The product **8** was isolated as an orange solid (35.0 mg, 0.081 mmol, 41% yield, 92% *ee*, *dr* > 20:1).

**TLC (DCM/EtOAc 100:0.5)** *R<sub>f</sub>* 0.28 (UV, *p*-anisaldehyde).

**<sup>1</sup>H NMR (400 MHz, CDCl<sub>3</sub>)** δ (ppm) 8.17 – 8.02 (m, 2H), 7.43 (d, *J* = 8.3 Hz, 2H), 6.82 (dd, *J* = 8.3, 1.9 Hz, 1H), 6.67 (d, *J* = 2.0 Hz, 1H), 6.63 (dd, *J* = 7.7, 2.0 Hz, 1H), 6.56 (d, *J* = 8.1 Hz, 1H), 4.89 (dd, *J* = 7.7, 1.9 Hz, 1H), 4.12 (d, *J* = 11.8 Hz, 1H), 3.62 (d, *J* = 11.7 Hz, 1H), 3.37 (s, 3H), 3.00 (s, 3H), 1.73 (s, 3H).

**<sup>13</sup>C NMR (101 MHz, CDCl<sub>3</sub>)** δ (ppm) 170.2 (C), 150.0 (C), 149.6 (C), 147.2 (C), 133.0 (C), 129.1 (2 CH), 124.8 (C), 124.4 (CH), 123.7 (2 CH), 121.3 (CH), 109.5 (CH), 107.0 (CH), 105.6 (CH), 101.4 (C), 61.2 (CH<sub>3</sub>), 48.3 (CH), 42.9 (CH), 32.1 (CH<sub>3</sub>), 20.8 (CH<sub>3</sub>).

**HRMS (ESI)** calc'd for  $[C_{21}H_{20}N_3O_5Cl+H]^+$ : 430.1164, found: 430.1163.

**HPLC** Chiralpak AD-H, Heptane/Isopropanol 80:20, 1 mL/min,  $\lambda = 254$  nm,  $\tau_{\text{minor}} = 5.87$  min  
 $\tau_{\text{major}} = 10.16$  min.

$[\alpha]_D^{25} = 63.7$  (c 0.110,  $CHCl_3$ ).

**m.p.** = 77-79 °C.

**(3R,4S,4aR)-N-methoxy-N,4a,9-trimethyl-3-(4-nitrophenyl)-4,4a-dihydro-3H-benzo[4,5]oxazolo[3,2-a]pyridine-4-carboxamide 9**

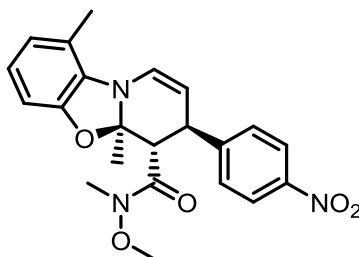

45% yield, dr > 20:1, 90% *ee*

According to the general procedure for the three-component reactions and starting from *N*-methoxy-*N*-methyl-3-oxobutanamide (29.0 mg, 0.200 mmol, 1 equiv), (2*E*)-3-(4-nitrophenyl)prop-2-enal (53.1 mg, 0.300 mmol, 1.5 equiv), 2-amino-3-methylphenol (24.6 mg, 0.200 mmol, 1 equiv), benzoic acid (9.8 mg, 0.080 mmol, 0.4 equiv) and the catalyst (13.0 mg, 0.040 mmol, 0.2 equiv). The product **9** was isolated as an orange solid (36.0 mg, 0.088 mmol, 45% yield, 90% *ee*, dr > 20:1).

**TLC (DCM/EtOAc 100:0.5)** *R*<sub>f</sub> 0.29 (UV, *p*-anisaldehyde).

**<sup>1</sup>H NMR (400 MHz, CDCl<sub>3</sub>)**  $\delta$  (ppm) 8.11 (d, *J* = 8.6 Hz, 2H), 7.44 (d, *J* = 8.3 Hz, 2H), 6.99 (dd, *J* = 7.9, 1.8 Hz, 1H), 6.68 – 6.60 (m, 2H), 6.56 (dd, *J* = 7.2, 1.8 Hz, 1H), 4.77 (dd, *J* = 8.0, 1.9 Hz, 1H), 4.10 (d, *J* = 11.8 Hz, 1H), 3.69 (d, *J* = 11.8 Hz, 1H), 3.40 (s, 3H), 3.00 (s, 3H), 2.42 (s, 3H), 1.73 (s, 3H).

**<sup>13</sup>C NMR (101 MHz, CDCl<sub>3</sub>)**  $\delta$  (ppm) 170.7 (C), 150.2 (C), 149.2 (C), 147.1 (C), 131.6 (C), 129.1 (2 CH), 126.3 (CH), 124.6 (CH), 123.6 (2 CH), 120.4 (CH), 119.0 (C), 106.6 (CH), 104.2 (CH), 99.6 (C), 61.2 (CH<sub>3</sub>), 48.6 (CH<sub>3</sub>), 42.6 (CH), 32.1 (CH), 20.6 (CH<sub>3</sub>), 18.7 (CH<sub>3</sub>).

**HRMS (ESI)** calc'd for  $[C_{22}H_{23}N_3O_5+H]^+$ : 410.1710, found: 410.1711.

**HPLC** Lux-Cellulose-4, Heptane/Isopropanol 80:20, 1 mL/min,  $\lambda = 254$  nm,  $\tau_{\text{minor}} = 9.35$  min  
 $\tau_{\text{major}} = 11.23$  min.

$[\alpha]_D^{25} = 36.9$  (c 0.095,  $CHCl_3$ ).

**m.p.** = 89-90 °C

**(3R,4S,4aR)-N-methoxy-N,4a,7-trimethyl-3-(4-nitrophenyl)-4,4a-dihydro-3H-benzo[4,5]oxazolo[3,2-a]pyridine-4-carboxamide 10**

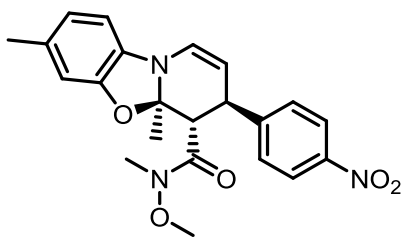

45% yield, dr > 20:1, 92% *ee*

According to the general procedure for the three-component reactions and starting from *N*-methoxy-*N*-methyl-3-oxobutanamide (29.0 mg, 0.200 mmol, 1 equiv), (*2E*)-3-(4-nitrophenyl)prop-2-enal (53.1 mg, 0.300 mmol, 1.5 equiv), 6-amino-*m*-cresol (24.6 mg, 0.200 mmol, 1 equiv), benzoic acid (9.8 mg, 0.080 mmol, 0.4 equiv) and the catalyst (13.0 mg, 0.040 mmol, 0.2 equiv). The product **10** was isolated as an orange solid (36.0 mg, 0.088 mmol, 45% yield, 92% *ee*, dr > 20:1).

**TLC (DCM/EtOAc 100:0.5)** *R*<sub>f</sub> 0.28 (UV, *p*-anisaldehyde).

**<sup>1</sup>H NMR (400 MHz, CDCl<sub>3</sub>)** δ (ppm) δ 8.17 – 8.00 (m, 2H), 7.49 – 7.38 (m, 2H), 6.68 – 6.63 (m, 2H), 6.57 (d, *J* = 7.7 Hz, 1H), 6.52 (s, 1H), 4.81 (dd, *J* = 7.6, 1.9 Hz, 1H), 4.12 (dd, *J* = 11.5, 2.1 Hz, 1H), 3.62 (d, *J* = 11.6 Hz, 1H), 3.39 (s, 3H), 3.00 (s, 3H), 2.25 (s, 3H), 1.72 (s, 3H).

**<sup>13</sup>C NMR (101 MHz, CDCl<sub>3</sub>)** δ (ppm) <sup>13</sup>C NMR (101 MHz, CDCl<sub>3</sub>) δ 170.8 (C), 150.3 (C), 149.4 (C), 147.2 (C), 132.0 (C), 130.4 (C), 129.2 (2 CH), 125.1 (CH), 123.7 (2 CH), 121.6 (CH), 109.7 (CH), 106.6 (CH), 104.4 (CH), 100.4 (C), 61.3 (CH<sub>3</sub>), 48.4 (CH<sub>3</sub>), 43.0 (CH), 32.2 (CH), 21.3 (CH<sub>3</sub>), 21.0 (CH<sub>3</sub>).

**HRMS (ESI)** calc'd for [C<sub>23</sub>H<sub>23</sub>N<sub>3</sub>O<sub>5</sub>+H]<sup>+</sup>: 410.1710, found: 410.1711.

**HPLC** Chiralpak IF, Heptane/Isopropanol 80:20, 1 mL/min, λ = 254 nm, τ<sub>minor</sub> = 6.57 min  
τ<sub>major</sub> = 8.75 min.

[α]<sub>D</sub><sup>25</sup> = 255 (c 0.090, CHCl<sub>3</sub>).

**m.p.** = 73-74 °C.

**(3R,4S,4aR)-N-methoxy-N,4a-dimethyl-3-(4-nitrophenyl)-4,4a-dihydro-3H-naphtho[2',3':4,5]oxazolo[3,2-a]pyridine-4-carboxamide 11**

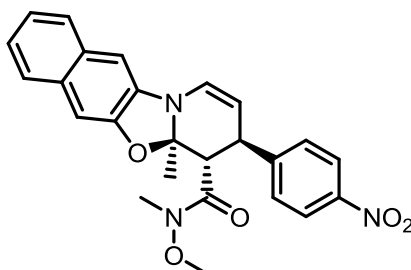

55% yield, dr > 20:1, 96% *ee*

According to the general procedure for the three-component reactions and starting from *N*-methoxy-*N*-methyl-3-oxobutanamide (29.0 mg, 0.200 mmol, 1 equiv), (*2E*)-3-(4-

nitrophenyl)prop-2-enal (53.1 mg, 0.300 mmol, 1.5 equiv), 3-aminonaphthalen-2-ol (31.8 mg, 0.200 mmol, 1 equiv), benzoic acid (9.8 mg, 0.080 mmol, 0.4 equiv) and the catalyst (13.0 mg, 0.040 mmol, 0.2 equiv). The product **11** was isolated as an orange solid (49.0 mg, 0.110 mmol, 55% yield, 96% *ee*, *dr* > 20:1).

**2-mmol scale reaction:** According to the general procedure for the three-component reactions, a larger amount of (3*R*,4*S*,4*aR*)-*N*-methoxy-*N*,4*a*-dimethyl-3-(4-nitrophenyl)-4,4*a*-dihydro-3*H* naphtho[2',3':4,5]oxazolo[3,2-*a*]pyridine-4-carboxamide was prepared starting from *N*-methoxy-*N*-methyl-3-oxobutanamide (290 mg, 2 mmol, 1 equiv), (2*E*)-3-(4-nitrophenyl)prop-2-enal (531 mg, 3 mmol, 1.5 equiv), 3-aminonaphthalen-2-ol (318 mg, 2 mmol, 1 equiv), benzoic acid (98 mg, 0.800 mmol, 0.4 equiv) and the catalyst (130 mg, 0.400 mmol, 0.2 equiv). The product **11** was isolated as an orange solid (472 mg, 1.06 mmol, 53% yield, 94% *ee*, *dr* > 20:1).

**TLC (DCM/EtOAc 100:0.5)** *R*<sub>f</sub> 0.39 (UV, *p*-anisaldehyde).

**<sup>1</sup>H NMR (400 MHz, CDCl<sub>3</sub>)** δ (ppm) 8.12 (d, *J* = 8.7 Hz, 2H), 7.63 (d, *J* = 7.9 Hz, 1H), 7.58 (d, *J* = 7.7 Hz, 1H), 7.44 (d, *J* = 8.6 Hz, 2H), 7.36 – 7.20 (m, 2H), 6.97 (s, 1H), 6.90 (s, 1H), 6.84 (dd, *J* = 7.6, 1.9 Hz, 1H), 4.98 (dd, *J* = 7.7, 1.9 Hz, 1H), 4.18 (d, *J* = 11.7 Hz, 1H), 3.65 (d, *J* = 11.7 Hz, 1H), 3.38 (s, 3H), 3.03 (s, 3H), 1.79 (s, 3H).

**<sup>13</sup>C NMR (101 MHz, CDCl<sub>3</sub>)** δ (ppm) 170.3(C), 149.7 (C), 149.6 (C), 147.2 (C), 134.2 (C), 130.8 (C), 129.9 (C), 129.1 (2 CH), 126.9 (CH), 126.1 (CH), 124.5 (CH), 124.2 (CH), 123.7 (3 CH), 106.4 (CH), 103.8 (CH), 101.5 (CH), 100.3 (C), 61.2 (CH<sub>3</sub>), 48.9 (CH), 43.2 (CH), 32.1 (CH<sub>3</sub>), 20.7 (CH<sub>3</sub>).

**HRMS (ESI)** calc'd for [C<sub>25</sub>H<sub>23</sub>N<sub>3</sub>O<sub>5</sub>+H]<sup>+</sup>: 446.1710, found: 446.1709.

**HPLC** Chiralpak IA, Heptane/Isopropanol 80:20, 1 mL/min, λ = 254 nm, τ<sub>minor</sub> = 7.03 min, τ<sub>major</sub> = 8.01 min.

[α]<sub>D</sub><sup>25</sup> = 281.6 (c 0.100, CHCl<sub>3</sub>).

**m.p.** = 112-113 °C.

**(3*R*,4*S*,4*aR*)-*N*-methoxy-*N*,4*a*-dimethyl-3-phenyl-4,4*a*-dihydro-3*H*-naphtho[2',3':4,5]oxazolo[3,2-*a*]pyridine-4-carboxamide **12****

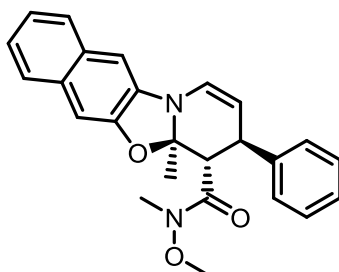

43% yield, *dr* > 20:1, 94% *ee*

**2-mmol scale reaction:** According to the general procedure for the three-component reactions, a larger amount of (3*R*,4*S*,4*aR*)-*N*-methoxy-*N*,4*a*-dimethyl-3-phenyl-4,4*a*-dihydro-3*H*-naphtho[2',3':4,5]oxazolo [3,2-*a*]pyridine-4-carboxamide was prepared starting from *N*-

methoxy-*N*-methyl-3-oxobutanamide (290 mg, 2 mmol, 1 equiv), (*2E*)-cinnamaldehyde (378  $\mu$ L, 3 mmol, 1.5 equiv), 3-aminonaphthalen-2-ol (318 mg, 2 mmol, 1 equiv), benzoic acid (98 mg, 0.800 mmol, 0.4 equiv) and the catalyst (130 mg, 0.400 mmol, 0.2 equiv). The product **12** was isolated as a yellow oil (344 mg, 0.859 mmol, 43% yield, 94% ee, dr > 20:1).

**TLC (DCM/EtOAc 100:0.5)** R<sub>f</sub> 0.38 (UV, *p*-anisaldehyde).

**<sup>1</sup>H NMR (400 MHz, CDCl<sub>3</sub>)**  $\delta$  (ppm) 7.63 (d, *J* = 7.9 Hz, 1H), 7.58 (d, *J* = 7.7 Hz, 1H), 7.36 – 7.13 (m, 7H), 6.96 (s, 1H), 6.87 (s, 1H), 6.78 (dd, *J* = 7.7, 1.8 Hz, 1H), 5.07 (dd, *J* = 7.6, 1.8 Hz, 1H), 4.06 (d, *J* = 11.5 Hz, 1H), 3.66 (d, *J* = 11.5 Hz, 1H), 3.24 (s, 3H), 3.04 (s, 3H), 1.81 (s, 3H).

**<sup>13</sup>C NMR (101 MHz, CDCl<sub>3</sub>)**  $\delta$  (ppm) 171.0 (C), 150.2 (C), 141.7 (C), 134.8 (C), 131.0 (C), 129.9 (C), 128.5 (2 CH), 128.2 (2 CH), 127.3 (CH), 126.9 (CH), 126.1 (CH), 124.4 (CH), 123.5 (CH), 123.4 (CH), 108.8 (CH), 103.7 (CH), 101.1 (CH), 100.8 (C), 61.1 (CH<sub>3</sub>), 49.5 (CH), 43.5 (CH), 32.1 (CH<sub>3</sub>), 20.8 (CH<sub>3</sub>).

**HRMS (ESI)** calc'd for [C<sub>25</sub>H<sub>24</sub>N<sub>2</sub>O<sub>3</sub>+H]<sup>+</sup>: 401.1865, found: 401.1866.

**HPLC** Chiralpak AZ-H, Heptane/Isopropanol 95:5, 1 mL/min,  $\lambda$  = 254 nm,  $\tau_{\text{minor}}$  = 11.36 min  
 $\tau_{\text{major}}$  = 14.39 min.

**$[\alpha]_{\text{D}}^{25}$**  = 54.5 (c 0.090, CHCl<sub>3</sub>).

**(3*R*,4*S*,4*aR*)-*N,N*,4*a*-trimethyl-3-(4-nitrophenyl)-4,4*a*-dihydro-3*H*-benzo[4,5]oxazolo[3,2-*a*]pyridine-4-carboxamide 13**

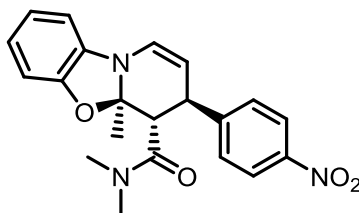

29% yield, dr > 20:1, 92% ee

According to the general procedure for the three-component reactions and starting from *N,N*-dimethylacetamide (24.0  $\mu$ L, 0.200 mmol, 1 equiv), (*2E*)-3-(4-nitrophenyl)prop-2-enal (53.1 mg, 0.300 mmol, 1.5 equiv), 2-aminophenol (21.8 mg, 0.200 mmol, 1 equiv), benzoic acid (9.8 mg, 0.080 mmol, 0.4 equiv) and the catalyst (13.0 mg, 0.040 mmol, 0.2 equiv). The product **13** was isolated as an orange solid (22.0 mg, 0.058 mmol, 29% yield, 92% ee, dr > 20:1).

**TLC (DCM/EtOAc 100:0.5)** R<sub>f</sub> 0.21 (UV, *p*-anisaldehyde).

**<sup>1</sup>H NMR (400 MHz, CDCl<sub>3</sub>)**  $\delta$  (ppm) 8.10 (d, *J* = 8.6 Hz, 2H), 7.45 (d, *J* = 8.7 Hz, 2H), 6.90 – 6.84 (m, 1H), 6.77 – 6.65 (m, 4H), 4.85 (dd, *J* = 7.6, 1.9 Hz, 1H), 4.26 (d, *J* = 11.3 Hz, 1H), 3.28 (d, *J* = 11.2 Hz, 1H), 2.84 (s, 3H), 2.79 (s, 3H), 1.69 (s, 3H).

**<sup>13</sup>C NMR (101 MHz, CDCl<sub>3</sub>)**  $\delta$  (ppm) <sup>13</sup>C NMR (101 MHz, CDCl<sub>3</sub>)  $\delta$  168.9 (C), 150.6 (C), 149.1 (C), 147.1 (C), 134.2 (C), 129.1 (2 CH), 124.5 (CH), 123.7 (2 CH), 121.8 (CH), 120.3

(CH), 108.6 (CH), 107.0 (CH), 105.5 (CH), 100.8 (C), 49.7 (CH), 42.9 (CH), 38.0 (CH<sub>3</sub>), 36.2 (CH<sub>3</sub>), 20.9 (CH<sub>3</sub>).

**HRMS (ESI)** calc'd for [C<sub>21</sub>H<sub>21</sub>N<sub>3</sub>O<sub>4</sub>+H]<sup>+</sup>: 380.1605, found: 380.1602.

**HPLC** Chiralpak IA, Heptane/Isopropanol 80:20, 1 mL/min, λ = 254 nm, τ<sub>minor</sub> = 5.58 min  
τ<sub>major</sub> = 6.42 min.

[α]<sub>D</sub><sup>25</sup> = 86.7 (c 0.090, CHCl<sub>3</sub>).

**m.p.** = 69-71 °C

**(3R,4S,4aR)-N,N-dibenzyl-4a-methyl-3-(4-nitrophenyl)-4,4a-dihydro-3H-benzo[4,5]oxazolo[3,2-a]pyridine-4-carboxamide 14**

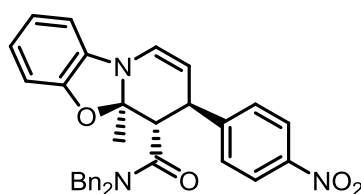

34% yield, dr > 20:1, 92% ee

According to the general procedure for the three-component reactions and starting from *N,N*-dibenzyl-3-oxobutanamide (56.3 mg, 0.200 mmol, 1 equiv), (*2E*)-3-(4-nitrophenyl)prop-2-enal (53.1 mg, 0.300 mmol, 1.5 equiv), 2-aminophenol (21.8 mg, 0.200 mmol, 1 equiv), benzoic acid (9.8 mg, 0.080 mmol, 0.4 equiv) and the catalyst (13.0 mg, 0.040 mmol, 0.2 equiv). The product **14** was isolated as an orange oil (36.0 mg, 0.068 mmol, 34% yield, 92% ee, dr > 20:1).

**TLC (DCM/EtOAc 97:3)** R<sub>f</sub> 0.45 (UV, *p*-anisaldehyde).

**<sup>1</sup>H NMR (400 MHz, CDCl<sub>3</sub>)** δ (ppm) 8.03 (d, *J* = 8.7 Hz, 2H), 7.38 (d, *J* = 8.7 Hz, 2H), 7.29 – 7.25 (m, 3H), 7.15 (t, *J* = 7.4 Hz, 1H), 7.08 – 7.05 (m, 2H), 7.00 (t, *J* = 7.7 Hz, 2H), 6.85 (t, *J* = 7.6 Hz, 1H), 6.73 – 6.65 (m, 3H), 6.60 (d, *J* = 7.7 Hz, 1H), 6.42 (d, *J* = 7.4 Hz, 2H), 4.96 (d, *J* = 15.1 Hz, 1H), 4.86 (dd, *J* = 7.6, 1.8 Hz, 1H), 4.67 (d, *J* = 17.0 Hz, 1H), 4.41 (d, *J* = 11.0 Hz, 1H), 4.18 (d, *J* = 17.1 Hz, 1H), 4.03 (d, *J* = 15.1 Hz, 1H), 3.29 (d, *J* = 11.0 Hz, 1H), 1.77 (s, 3H).

**<sup>13</sup>C NMR (101 MHz, CDCl<sub>3</sub>)** δ (ppm) 169.6 (C), 150.4 (C), 148.8 (C), 147.1 (C), 136.8 (C), 136.1 (C), 134.1 (C), 129.5 (2 CH), 128.6 (4 CH), 127.6 (CH), 127.4 (2 CH), 127.3 (CH), 126.3 (2 CH), 124.5 (CH), 123.7 (2 CH), 121.9 (CH), 120.4 (CH), 108.7 (CH), 107.0 (CH), 105.5 (CH), 100.7 (C), 50.4 (CH<sub>2</sub>), 50.3 (CH), 48.8 (CH<sub>2</sub>), 42.9 (CH), 21.1 (CH<sub>3</sub>).

**HRMS (ESI)** calc'd for [C<sub>33</sub>H<sub>29</sub>N<sub>3</sub>O<sub>4</sub>+H]<sup>+</sup>: 532.2231, found: 532.2233.

**HPLC** Chiralpak IA, Heptane/Isopropanol 80:20, 1 mL/min, λ = 254 nm, τ<sub>minor</sub> = 6.29 min  
τ<sub>major</sub> = 8.81 min.

[α]<sub>D</sub><sup>25</sup> = 147 (c 0.115, CHCl<sub>3</sub>).



### 3.2 Procedures for the post-functionalization of product 11:

#### (3*R*,4*S*,4*aR*)-3-(4-aminophenyl)-*N*-methoxy-*N*,4*a*-dimethyl-2,3,4,4*a*-tetrahydro-1*H*-naphtho[2',3':4,5]oxazolo[3,2-*a*]pyridine-4-carboxamide 15

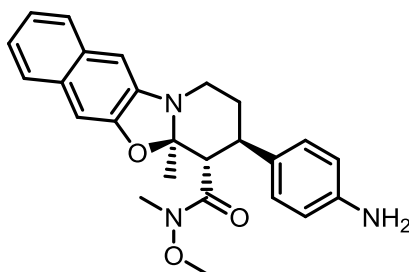

91% yield, dr > 20:1, 94% *ee*

The previously described (3*R*,4*S*,4*aR*)-*N*-methoxy-*N*,4*a*-dimethyl-3-(4-nitrophenyl)-4,4*a*-dihydro-3*H* naphtho[2',3':4,5]oxazolo[3,2-*a*]pyridine-4-carboxamide **11** (20 mg, 0.045 mmol, 1 equiv) was dissolved in methanol (2 mL) under an argon atmosphere. Then, Pd/C (4 mg, 0.038 mmol, 20 wt. %) was added to the solution before flushing the reaction mixture with hydrogen. The reaction was stirred at room temperature during 13 h. After filtration on celite and washing with dichloromethane, solvents were removed under vacuum. Purification over silica gel (dichloromethane/ethyl acetate (gradient from 80:20 to 2:1)) directly yielded the corresponding hydrogenated product **15** as a red solid (17 mg, 0.041 mmol, 91 % yield, 94% *ee*, dr > 20:1).

**TLC (DCM/EtOAc 100:0.5)** R<sub>f</sub> 0.35 (UV, *p*-anisaldehyde).

**<sup>1</sup>H NMR (400 MHz, CDCl<sub>3</sub>)** 7.59 (t, *J* = 6.8 Hz, 2H), 7.19 – 7.34 (m, 2H), 6.96 – 6.87 (m, 3H), 6.65 – 6.57 (m, 3H), 3.88 (dd, *J* = 14.6, 3.0 Hz, 1H), 3.76 (d, *J* = 11.8 Hz, 1H), 3.60 (s, 3H), 3.44 – 3.33 (m, 1H), 3.21 – 3.10 (m, 1H), 2.90 (s, 3H), 1.91 (s, 3H), 1.82 (td, *J* = 13.0, 4.3 Hz, 1H), 1.71 (d, *J* = 12.1 Hz, 1H). The 2 H of the NH<sub>2</sub> group appear as a very broad and flat signal between 4.40 and 2.60 ppm.

**<sup>13</sup>C NMR (101 MHz, CDCl<sub>3</sub>)** 171.8 (C), 149.9 (C), 143.7 (C), 139.0 (C), 133.3 (C), 131.5 (C), 129.4 (C), 128.6 (2 CH), 126.8 (CH), 125.8 (CH), 124.2 (CH), 122.7 (CH), 115.8 (2 CH), 103.8 (CH), 102.2 (C), 99.5 (CH), 61.4 (CH<sub>3</sub>), 49.4 (CH), 42.9 (CH), 41.7 (CH<sub>2</sub>), 32.1 (CH<sub>3</sub>), 30.5 (CH<sub>2</sub>), 20.3 (CH<sub>3</sub>).

**HRMS (ESI)** calc'd for [C<sub>25</sub>H<sub>27</sub>N<sub>3</sub>O<sub>3</sub>+H]<sup>+</sup>: 418.2125, found: 418.2122.

**HPLC** Lux-Cellulose-4, Heptane/Ethanol 80:20, 1 mL/min, λ = 254 nm, τ<sub>minor</sub> = 18.99 min  
τ<sub>major</sub> = 21.02 min.

**[α]<sub>D</sub><sup>25</sup>** = 112 (c 0.095, CHCl<sub>3</sub>).

**m.p.** = 126-127°C.

**(1*S*,3*R*,4*S*,4*aR*)-*N*-methoxy-*N*,4*a*-dimethyl-3-(4-nitrophenyl)-1-(phenylethynyl)-2,3,4,4*a*-tetrahydro-1*H*-naphtho[2',3':4,5]oxazolo[3,2-*a*]pyridine-4-carboxamide 16**

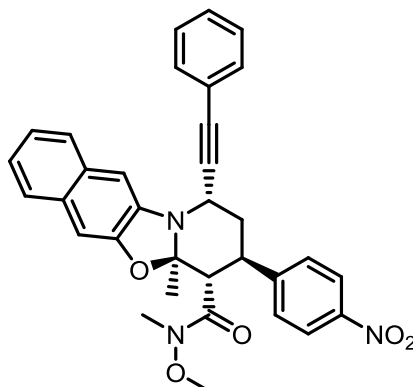

77% yield, dr > 20:1, 90% *ee*

A mixture of (3*R*,4*S*,4*aR*)-*N*-methoxy-*N*,4*a*-dimethyl-3-(4-nitrophenyl)-4,4*a*-dihydro-3*H* naphtho[2',3':4,5]oxazolo[3,2-*a*]pyridine-4-carboxamide **11** (20 mg, 0.045 mmol, 1 equiv), potassium phenylacetylenetrifluoroborate (11.2 mg, 0.054 mmol, 1.2 equiv) and scandium triflate (2.2 mg, 0.004 mmol, 0.1 equiv) was dissolved in 2 mL dichloromethane under argon atmosphere. The reaction mixture was stirred at room temperature during 13h. After filtration on celite, the dichloromethane were removed under vacuum. Purification over silica gel (dichloromethane/ethyl acetate (100:0.5)) directly yielded the desired product **16** as pale yellow solid (19 mg, 0.035 mmol, 77 % yield, 90% *ee*, dr > 20:1).

**TLC (DCM/EtOAc 100:0.5)** R<sub>f</sub> 0.35 (UV, *p*-anisaldehyde).

**<sup>1</sup>H NMR (400 MHz, CDCl<sub>3</sub>)** δ (ppm) 8.17 – 8.07 (m, 2H), 7.66 – 7.58 (m, 2H), 7.54 – 7.50 (m, 2H), 7.42 – 7.23 (m, 7H), 6.97 (s, 1H), 6.74 (s, 1H), 5.21 (dd, *J* = 5.2 and 1.9 Hz, 1H), 4.02 – 3.89 (m, 2H), 3.74 (s, 3H), 2.91 (s, 3H), 2.17 (s, 3H), 2.22 – 2.06 (m, 2H).

**<sup>13</sup>C NMR (101 MHz, CDCl<sub>3</sub>)** δ (ppm) 170.8 (C), 149.4 (C), 148.8 (C), 147.1 (C), 137.8 (C), 131.8 (2 CH), 131.2 (C), 129.7 (C), 129.0 (CH), 128.8 (2 CH), 128.6 (2 CH), 126.9 (CH), 126.1 (CH), 124.5 (CH), 123.9 (2 CH), 123.4 (CH), 122.4 (C), 104.2 (CH), 102.3 (C), 100.3 (CH), 87.2 (C), 85.1 (C), 61.5 (CH<sub>3</sub>), 49.2 (CH<sub>3</sub>), 45.0 (CH<sub>3</sub>), 40.1 (CH), 36.2 (CH<sub>2</sub>), 32.2 (CH), 23.2 (CH).

**HRMS (ESI)** calc'd for [C<sub>33</sub>H<sub>29</sub>N<sub>3</sub>O<sub>5</sub>+H]<sup>+</sup>: 548.2180, found: 548.2180.

**HPLC** Lux-Cellulose-2, Heptane/Ethanol 70:30, 1 mL/min, λ = 254 nm, τ<sub>major</sub> = 8.96 min  
τ<sub>minor</sub> = 9.91 min.

**[α]<sub>D</sub><sup>25</sup>** = 49.5 (c 0.090, CHCl<sub>3</sub>).

**m.p.** = 136-137 °C.

## 4.DETERMINATION OF RELATIVE CONFIGURATIONS:

### 4.1 Absolute Configurations of the products of the multicomponent reaction 1-14:

Even though no definitive proof for the absolute configuration could be obtained, it could be tentatively deduced from the previous results by Jørgensen and coworkers.<sup>2</sup> The fact that the sequential reaction (Table 1, entry 9), in which the Michael addition is performed in the absence of the 2-aminophenol, affords the product with the same absolute configuration as the multicomponent reaction (Table 1, entry 8) tends to show that the 2-aminophenol has no direct influence on the enantiodiscriminating step. As a consequence, the absolute configuration of the 1,2,3,4-tetrahydropyridines **1-14** can be attributed with reasonable confidence by comparison with the results obtained by Jørgensen.

*Jørgensen and co-workers:*

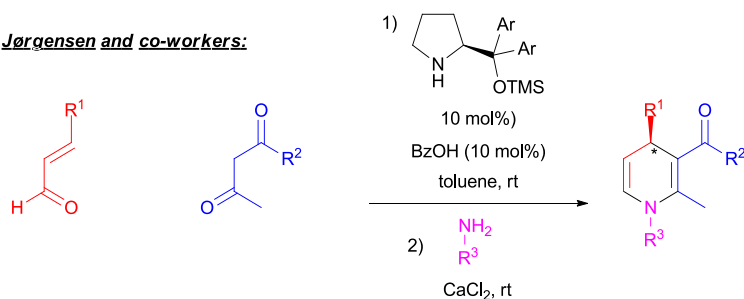

*Sequential reaction (Table 1, entry 8):*

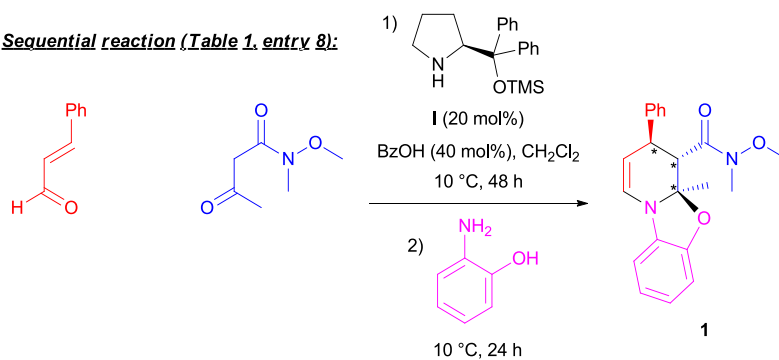

*Multicomponent reaction (Table 1, entry 9):*

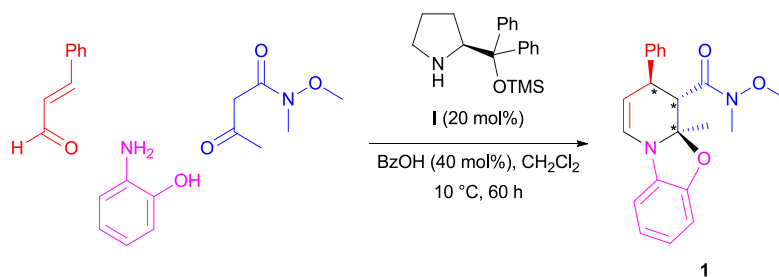

<sup>2</sup> P. T. Franke, R. L. Johansen, S. Bertelsen and K. A. Jørgensen, *Chem. Asian J.*, 2008, **3**, 216-224

## 4.2 Relative Configurations of the products of the multicomponent reaction 1-14:

The absolute configurations of the products were determined by analogy with related organocatalytic Michael additions.<sup>3</sup> With the use of (*S*)-catalyst, the title multicomponent reaction delivers the product with a (*3R*)-configuration.

The relative configurations of the products were assigned by the analysis of the coupling constants in <sup>1</sup>H NMR and NOESY experiments (the study below is given on compound **11**). At first, all the signals of the protons and carbon atoms were attributed thanks to 2D NMR studies (COSY, HMQC, HMBC). These 2D NMR spectra are presented at the end of this discussion on the relative configuration.

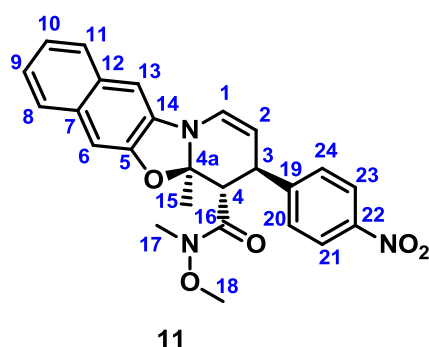

### Attributions:

The attribution of protons and carbon atoms 3 and 4 can be done thanks to HMQC and HMBC experiments:

- The HMQC spectrum shows that the carbon atom at 43.2 ppm is linked to the proton at 4.18 ppm whereas the carbon atom at 48.9 ppm is linked to the proton at 3.65 ppm (see below)
- In HMBC, we can see interactions between C<sub>3</sub> at 43.2 ppm and H<sub>2</sub> (4.98 ppm), H<sub>1</sub> (6.84 ppm) and H<sub>20</sub> and H<sub>24</sub> (7.44 ppm) (see below).
- In HMBC, we can see interactions between C<sub>4</sub> at 48.9 ppm and H<sub>15</sub> (1.79 ppm) and H<sub>2</sub> (4.98 ppm) (see below).
- There is also an interaction between H<sub>4</sub> at 3.65 ppm and C<sub>4a</sub> at 110.3 ppm.

The attribution of protons and carbon atoms 6, 13, 8 and 11 can be done thanks to NOESY and HMBC experiments:

- In the NOESY experiment, H<sub>1</sub> (which can be identified by its NOESY, HMBC and HMQC couplings with H<sub>2</sub> and C<sub>2</sub>) only interacts with one proton of the naphthyl

---

<sup>3</sup> P. T. Franke, R. L. Johansen, S. Bertelsen and K. A. Jørgensen, *Chem. Asian J.*, 2008, **3**, 216-224

moeity: it is H<sub>13</sub> at 6.90 ppm (see below) and we can deduce that H<sub>6</sub> is located just near to H<sub>13</sub> at 6.97 ppm.

- H<sub>13</sub> interacts with H<sub>11</sub> at 7.63 ppm and H<sub>6</sub> interacts with H<sub>8</sub> at 7.58 ppm (see below)

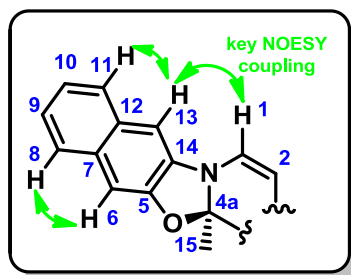

- On the HMBC spectrum, H<sub>13</sub> at 6.90 ppm interacts with C<sub>14</sub> at 149.7 ppm, H<sub>6</sub> at 6.97 ppm interacts with C<sub>5</sub> at 134.2 ppm. Moreover, H<sub>11</sub> at 7.63 ppm interacts with C<sub>12</sub> at 129.9 ppm, H<sub>8</sub> at 7.58 ppm interacts with C<sub>7</sub> at 130.8 ppm (see below).
- On the other aromatic system, H<sub>2</sub> at 4.98 ppm, H<sub>3</sub> at 4.18 ppm, H<sub>4</sub> at 3.65 ppm and H<sub>20,24</sub> at 7.44 ppm interact with C<sub>19</sub> at 149.6 ppm, whereas H<sub>21,23</sub> at 8.12 ppm and H<sub>20,24</sub> at 7.44 ppm interact with C<sub>22</sub> at 147.2 ppm (see below).

Based on these observations, we can give the following attributions:

**<sup>1</sup>H NMR (400 MHz, CDCl<sub>3</sub>)** δ (ppm) 8.12 (d, *J* = 8.7 Hz, 2H, H<sub>21</sub> and H<sub>23</sub>), 7.63 (d, *J* = 7.9 Hz, 1H, H<sub>11</sub>), 7.58 (d, *J* = 7.7 Hz, 1H, H<sub>8</sub>), 7.44 (d, *J* = 8.6 Hz, 2H, H<sub>20</sub> and H<sub>24</sub>), 7.36 – 7.20 (m, 2H, H<sub>9</sub> and H<sub>10</sub>), 6.97 (s, 1H, H<sub>6</sub>), 6.90 (s, 1H, H<sub>13</sub>), 6.84 (dd, *J* = 7.6, 1.9 Hz, 1H, H<sub>1</sub>), 4.98 (dd, *J* = 7.7, 1.9 Hz, 1H, H<sub>2</sub>), 4.18 (d, *J* = 11.7 Hz, 1H, H<sub>3</sub>), 3.65 (d, *J* = 11.7 Hz, 1H, H<sub>4</sub>), 3.38 (s, 3H, H<sub>18</sub>), 3.03 (s, 3H, H<sub>17</sub>), 1.79 (s, 3H, H<sub>15</sub>).

**<sup>13</sup>C NMR (101 MHz, CDCl<sub>3</sub>)** δ (ppm) 170.3 (C<sub>16</sub>), 149.7 (C<sub>14</sub>), 149.6 (C<sub>19</sub>), 147.2 (C<sub>22</sub>), 134.2 (C<sub>5</sub>), 130.8 (C<sub>7</sub>), 129.9 (C<sub>12</sub>), 129.1 (C<sub>20</sub> and C<sub>24</sub>), 126.9 (C<sub>8</sub>), 126.1 (C<sub>11</sub>), 124.5 (C<sub>10</sub>), 124.2 (C<sub>1</sub>), 123.7 (C<sub>9</sub>, C<sub>21</sub> and C<sub>23</sub>), 106.4 (C<sub>2</sub>), 103.8 (C<sub>6</sub>), 101.5 (C<sub>13</sub>), 100.3 (C<sub>4a</sub>), 61.2 (C<sub>18</sub>), 48.9 (C<sub>4</sub>), 43.2 (C<sub>3</sub>), 32.1 (C<sub>17</sub>), 20.7 (C<sub>15</sub>).

### Relative configurations:

On the schemes of the tetrahydropyridine ring presented below, the Weinreb amide is noted R and the two alkenyl protons are omitted for clarity. By application of Karplus equation:

- The <sup>2</sup>J<sub>gem</sub> between two geminal protons will have values between 11 and 14 Hz.
- The <sup>3</sup>J<sub>ax-ax</sub> between two axial protons on adjacent carbons will have values between 11 and 14 Hz.
- The <sup>3</sup>J<sub>ax-eq</sub> and <sup>3</sup>J<sub>eq-eq</sub> between two protons on adjacent carbons that are not both in axial positions will have values between 2 and 7 Hz.

Relative configuration at C<sub>4</sub>: In the <sup>1</sup>H NMR spectrum, the coupling constants of 11.7 Hz between H<sub>3</sub> and H<sub>4</sub> clearly indicates that those protons are in a *trans*-diaxial relationship, allowing determining the relative configuration at carbon C<sub>4</sub>.

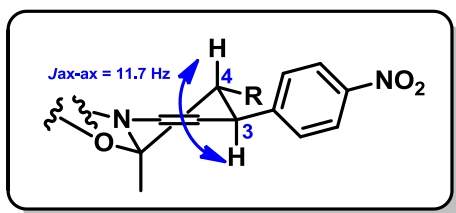

Relative configuration at  $\text{C}_{4a}$ : The NOE interaction between the 3  $\text{H}_{15}$  of the methyl group and  $\text{H}_3$  confirms that both groups are located in close proximity, on the same side on the polycyclic ring system, allowing the determination of the relative configuration at  $\text{C}_{4a}$ .

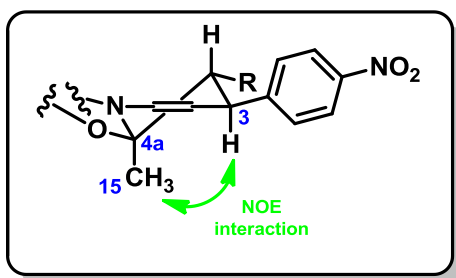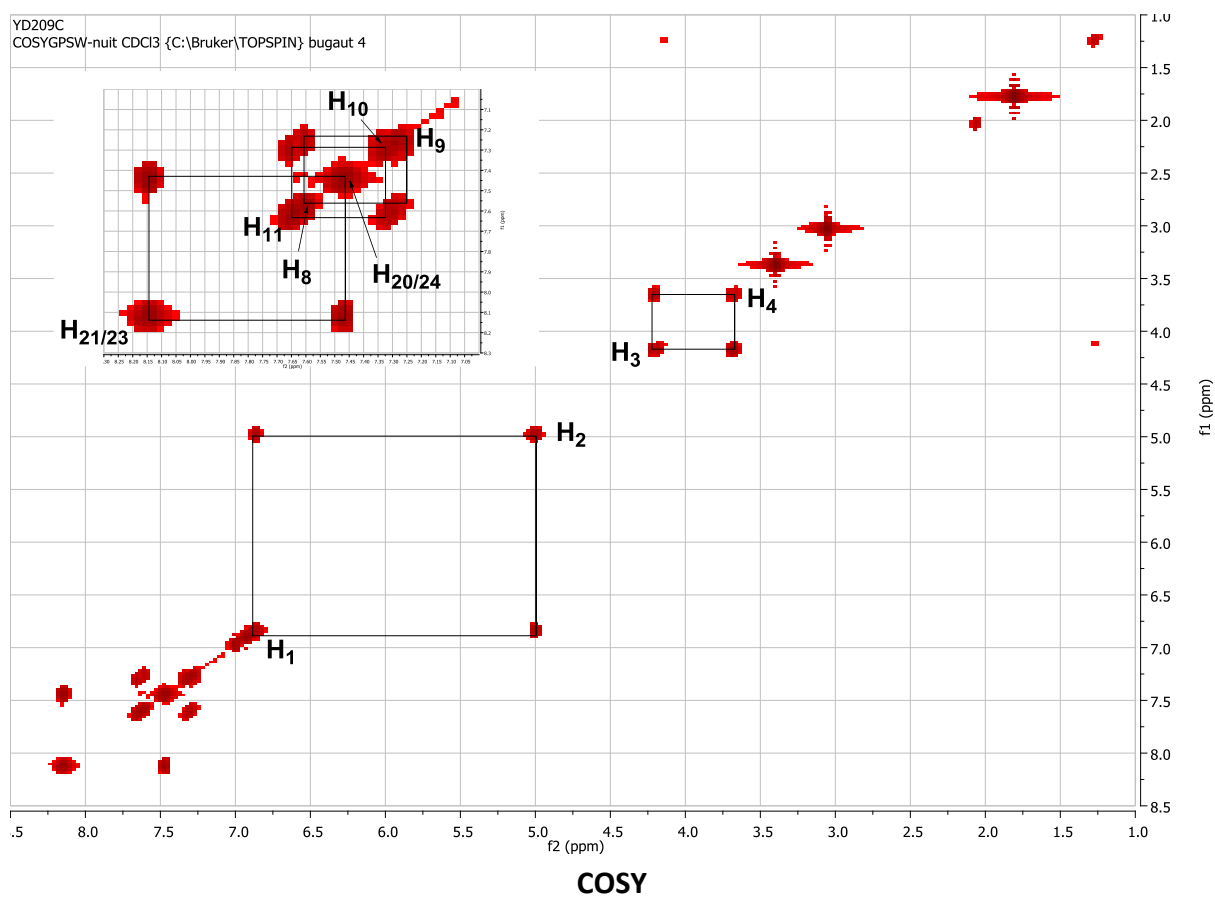

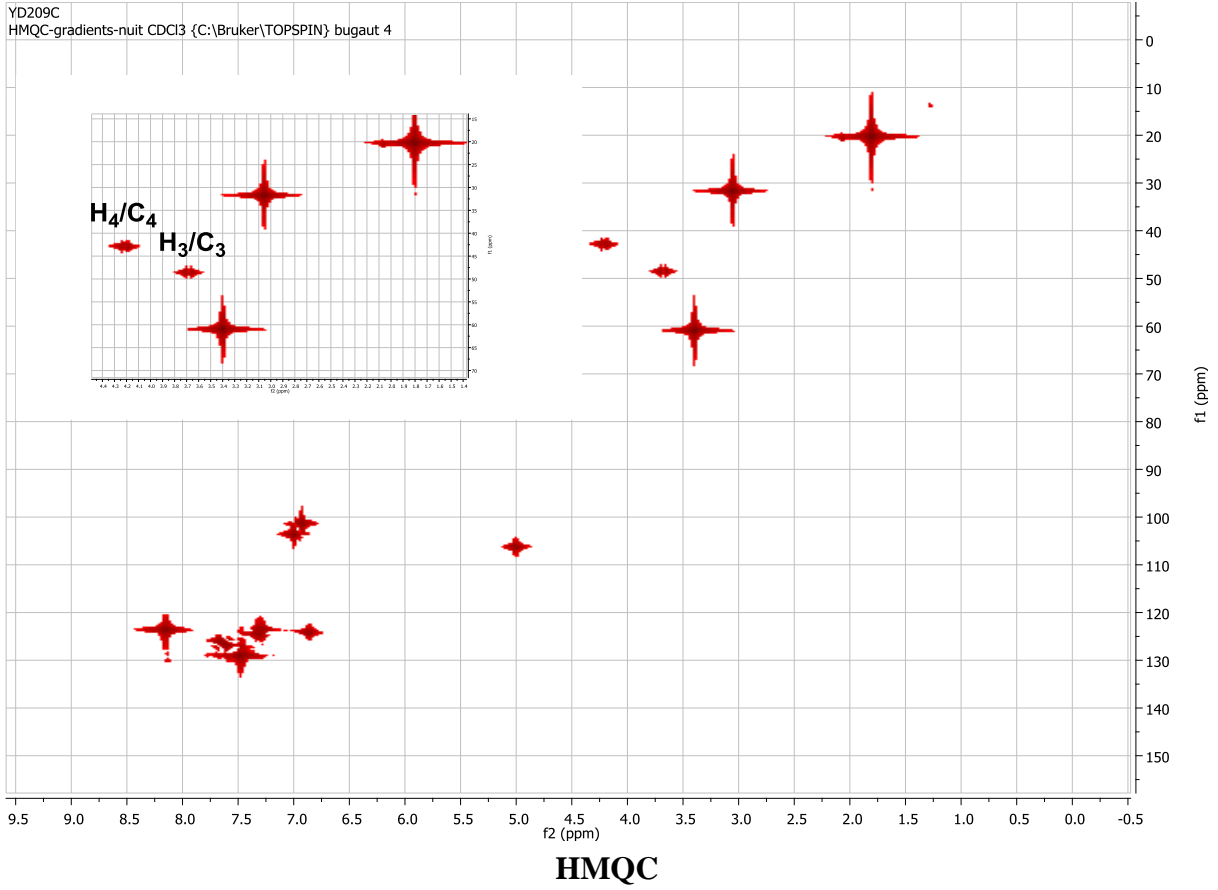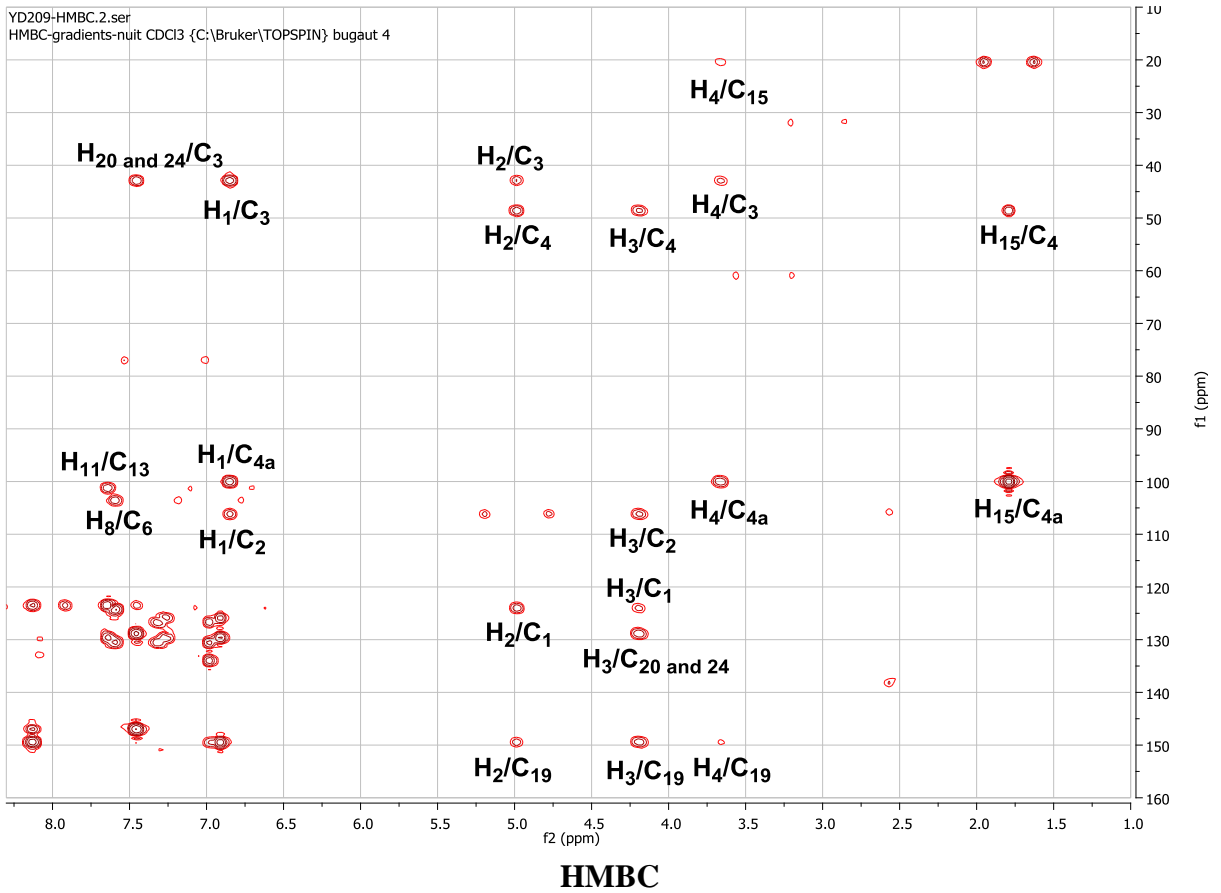

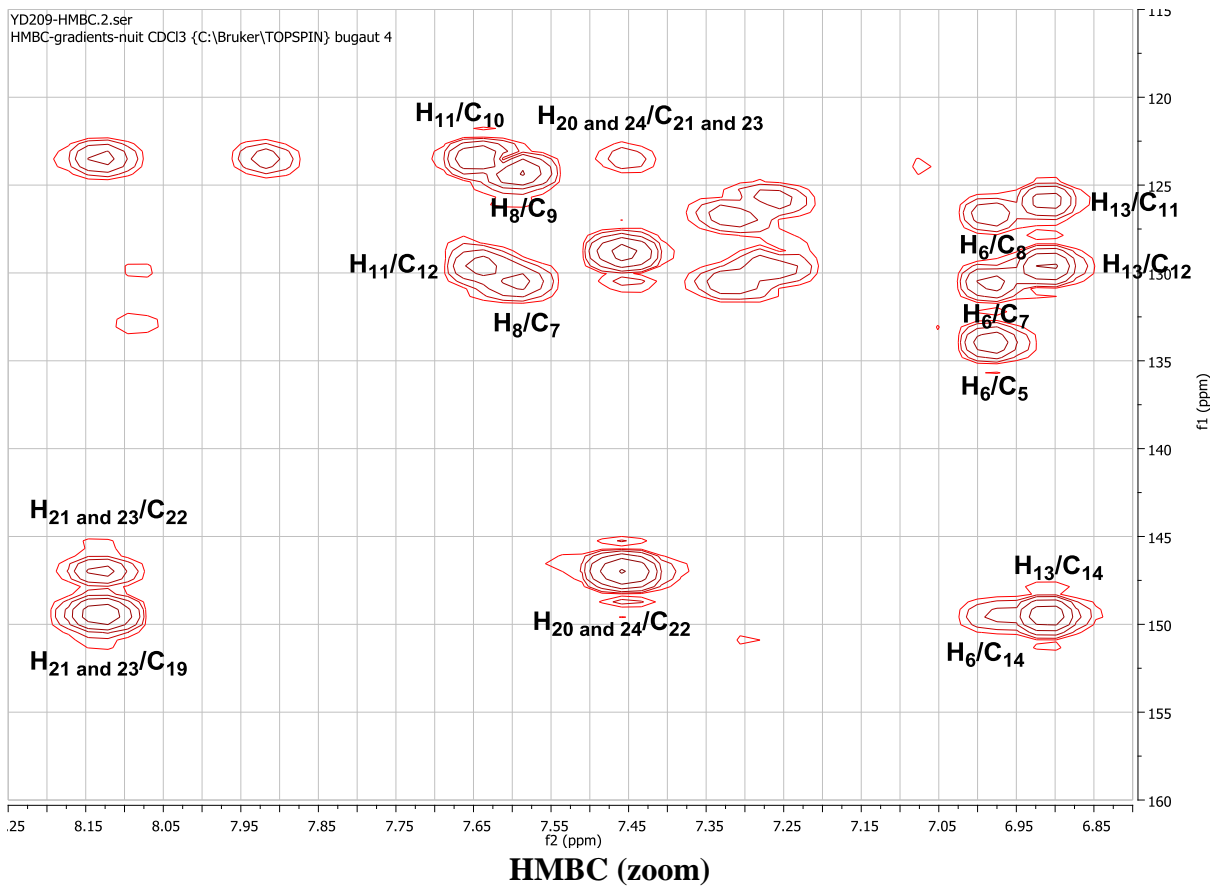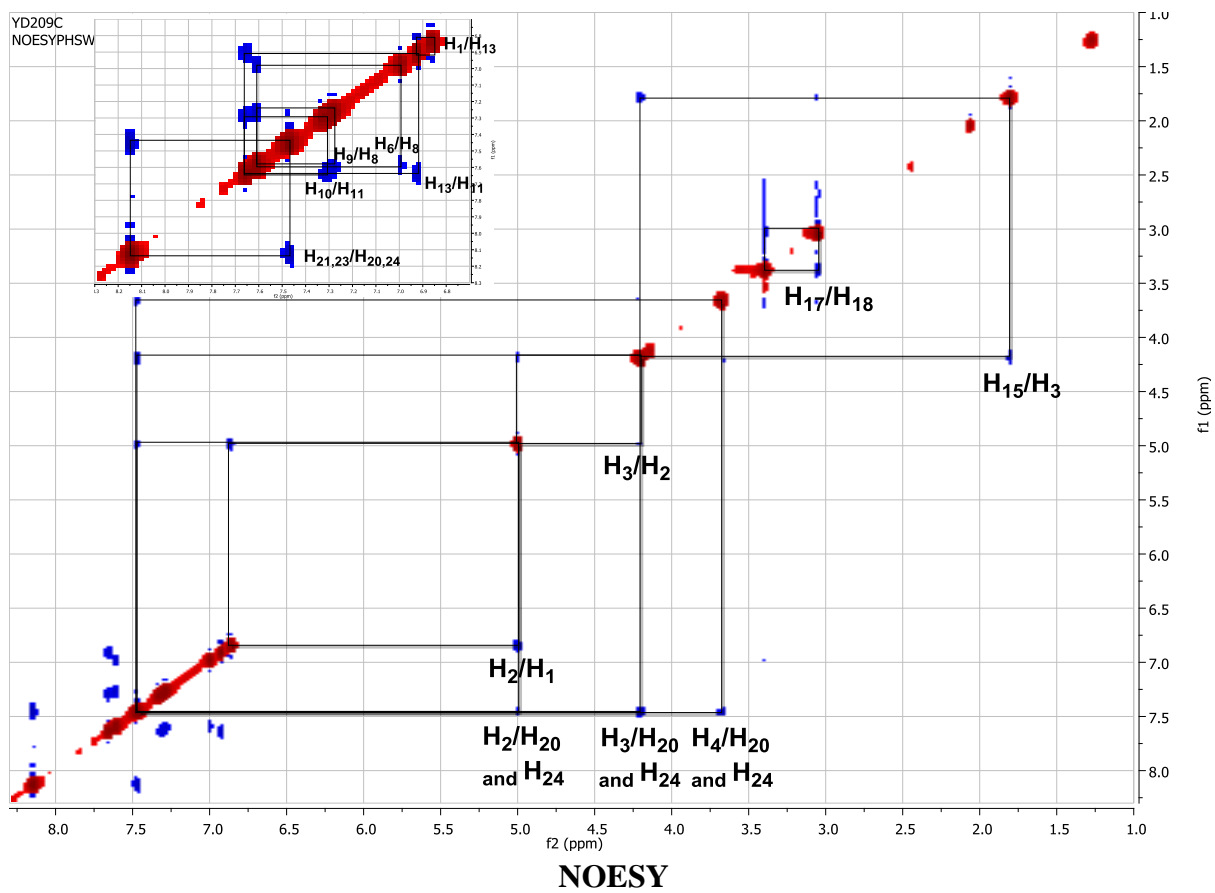



#### 4.3 Relative configuration of the product of postfunctionalization 16:

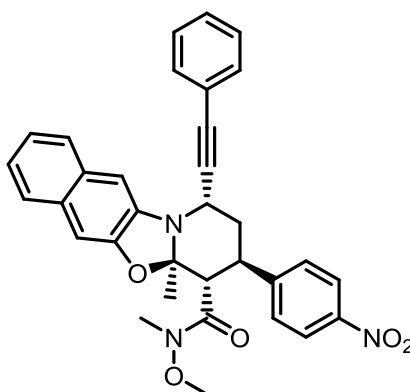

$^1\text{H NMR}$  (400 MHz,  $\text{CDCl}_3$ )  $\delta$  (ppm) 8.17 – 8.07 (m, 2H), 7.66 – 7.58 (m, 2H), 7.54 – 7.50 (m, 2H), 7.42 – 7.23 (m, 7H), 6.97 (s, 1H), 6.74 (s, 1H), 5.21 (dd,  $J = 5.2$  and 1.9 Hz, 1H), 4.02 – 3.89 (m, 2H), 3.74 (s, 3H), 2.91 (s, 3H), 2.17 (s, 3H), 2.22 – 2.06 (m, 2H).

$^{13}\text{C NMR}$  (101 MHz,  $\text{CDCl}_3$ )  $\delta$  (ppm) 170.8 (C), 149.4 (C), 148.8 (C), 147.1 (C), 137.8 (C), 131.8 (2 CH), 131.2 (C), 129.7 (C), 129.0 (CH), 128.8 (2 CH), 128.6 (2 CH), 126.9 (CH), 126.1 (CH), 124.5 (CH), 123.9 (2 CH), 123.4 (CH), 122.4 (C), 104.2 (CH), 102.3 (C), 100.3 (CH), 87.2 (C), 85.1 (C), 61.5 ( $\text{CH}_3$ ), 49.2 ( $\text{CH}_3$ ), 45.0 ( $\text{CH}_3$ ), 40.1 (CH), 36.2 ( $\text{CH}_2$ ), 32.2 (CH).

For the signal at 5.21 ppm, both coupling constants of 5.2 and 1.9 Hz are in the range of a classic  $^3J_{\text{ax-eq}}$  and  $^3J_{\text{eq-eq}}$  interactions, respectively, showing that the alkyne was added in axial position. On the scheme below, the Weinreb amide is noted E and the *para*-nitro aromatic Ar.

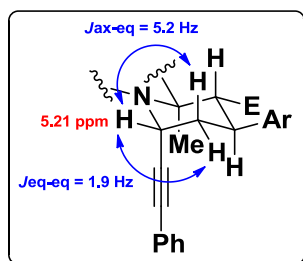

# 5. <sup>1</sup>H AND <sup>13</sup>C NMR SPECTRA:

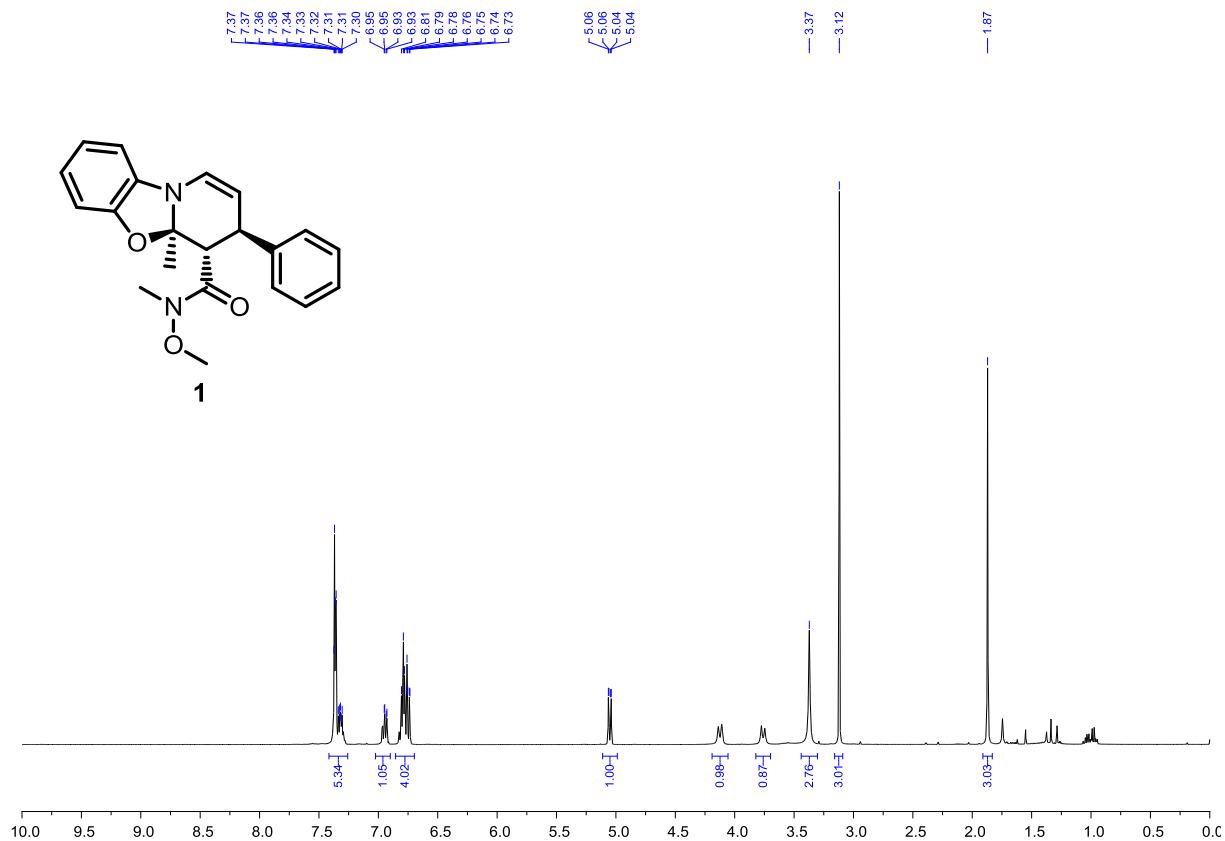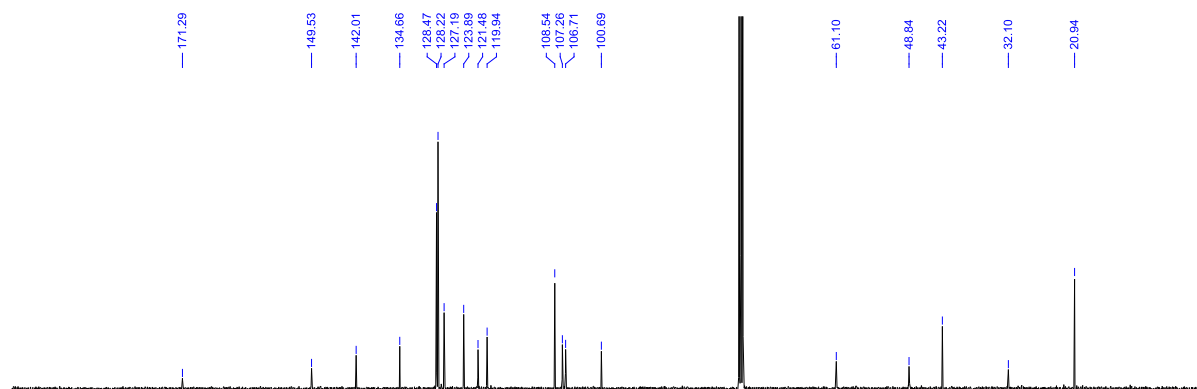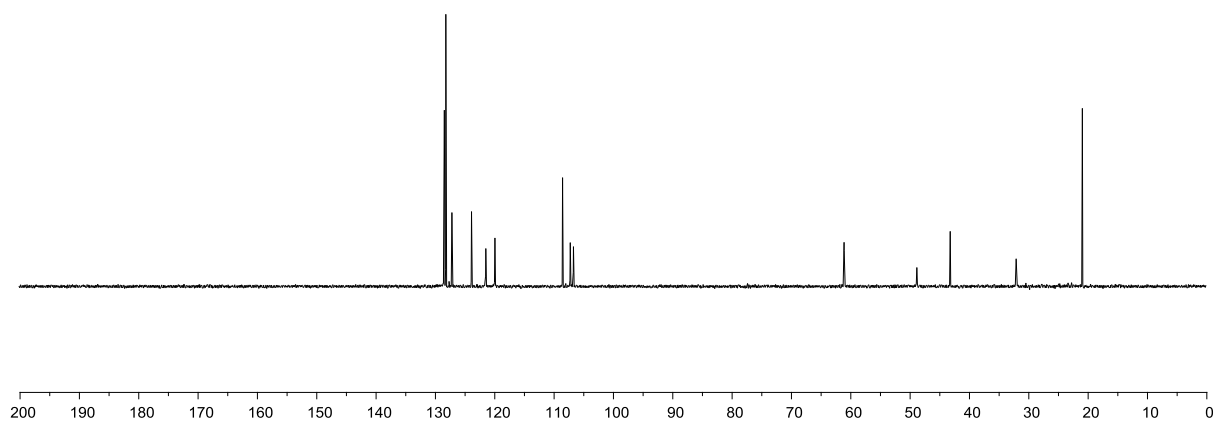

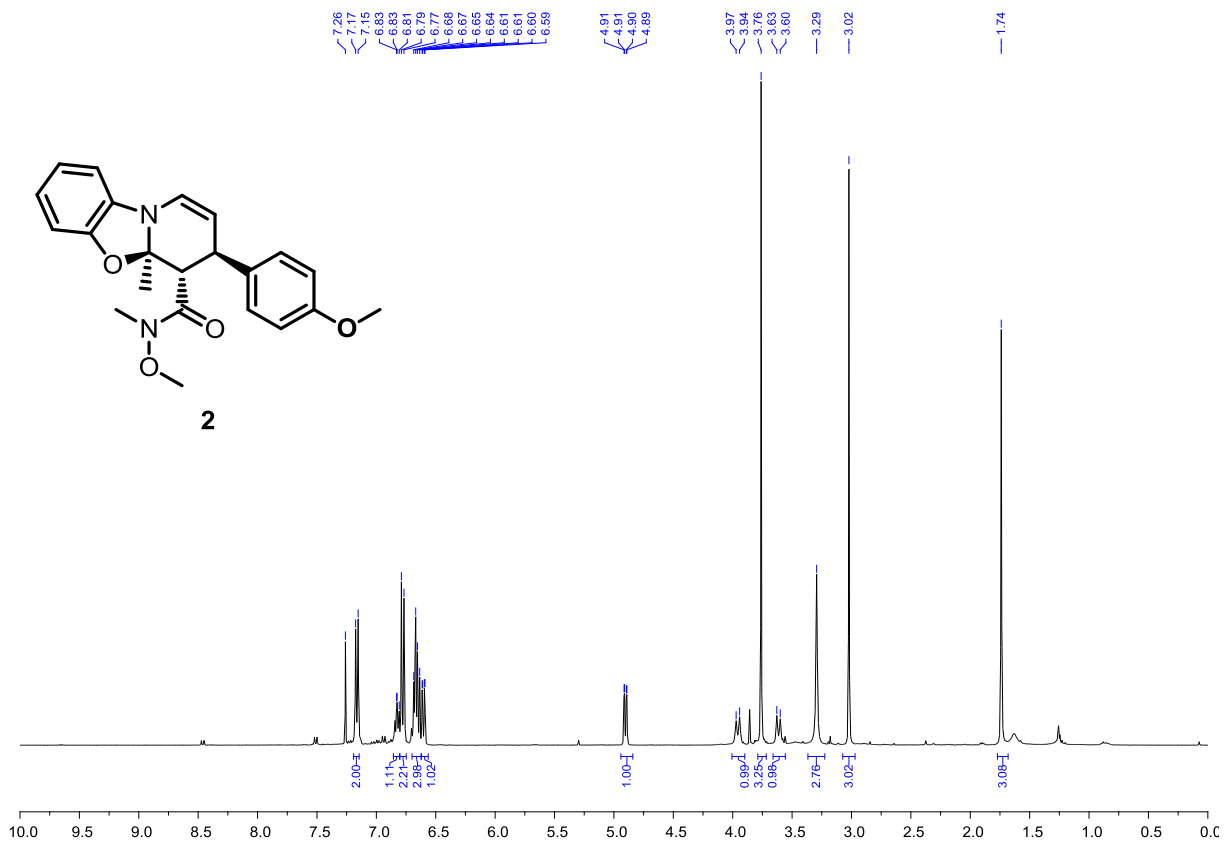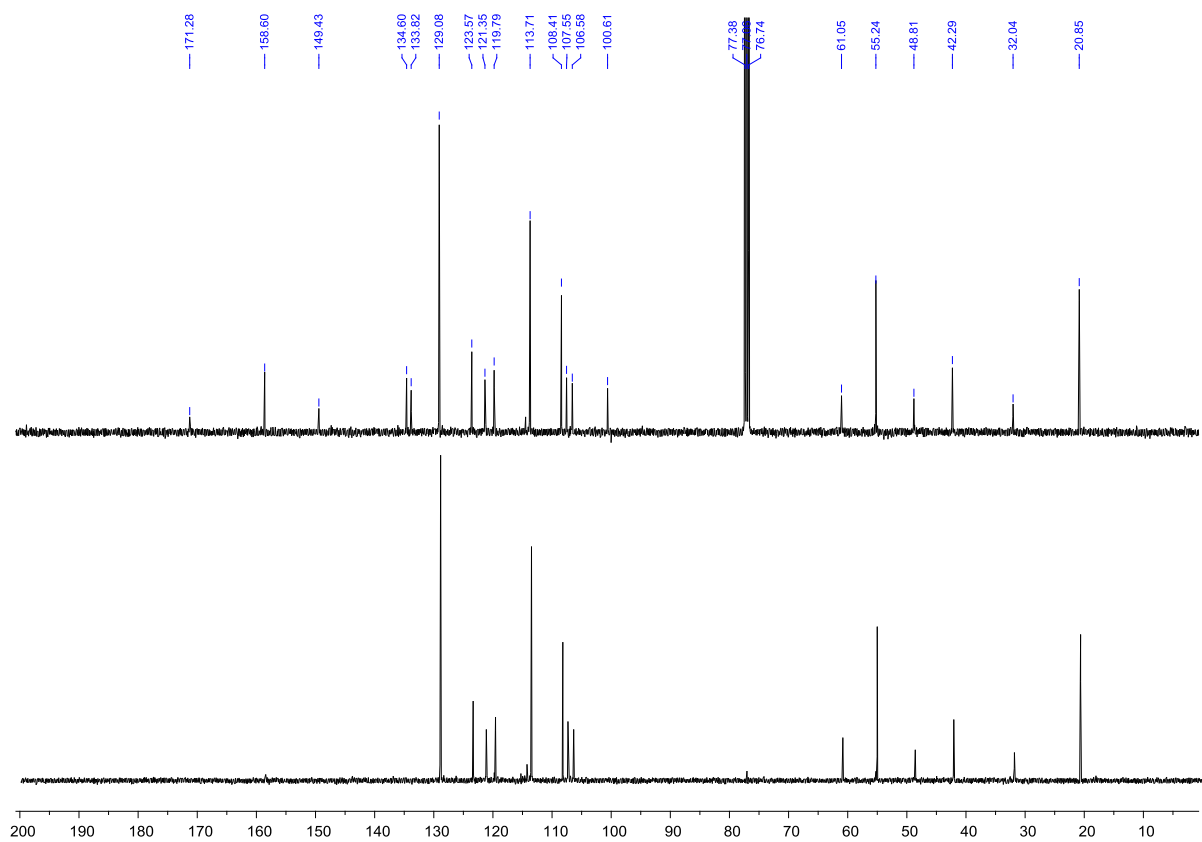

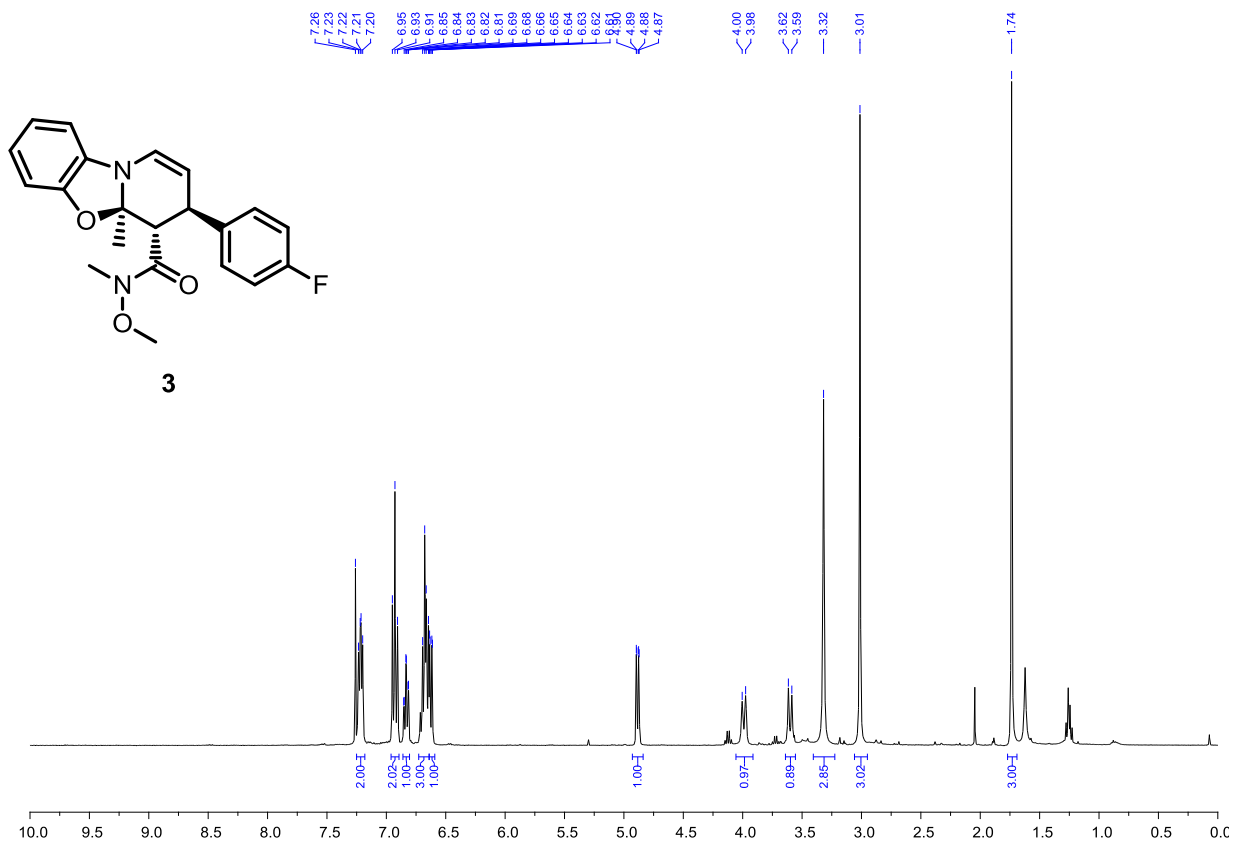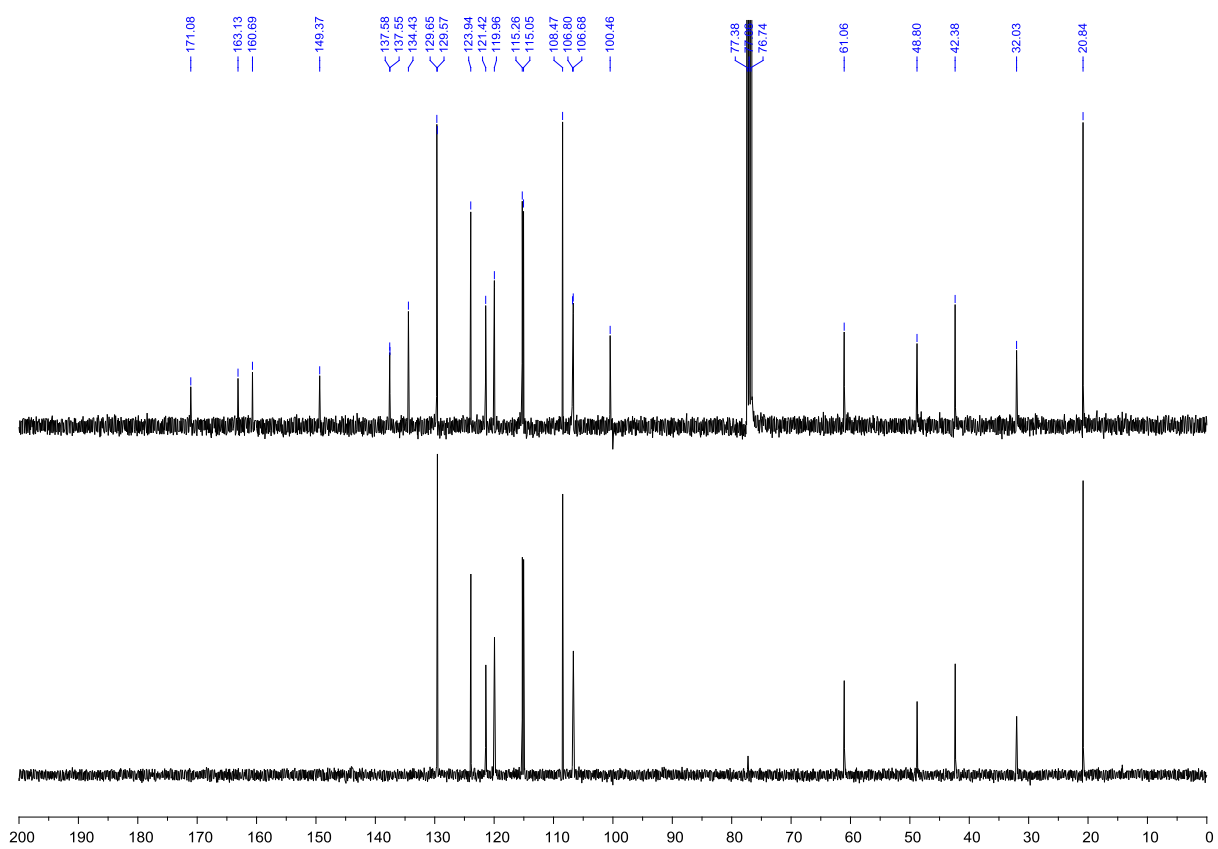

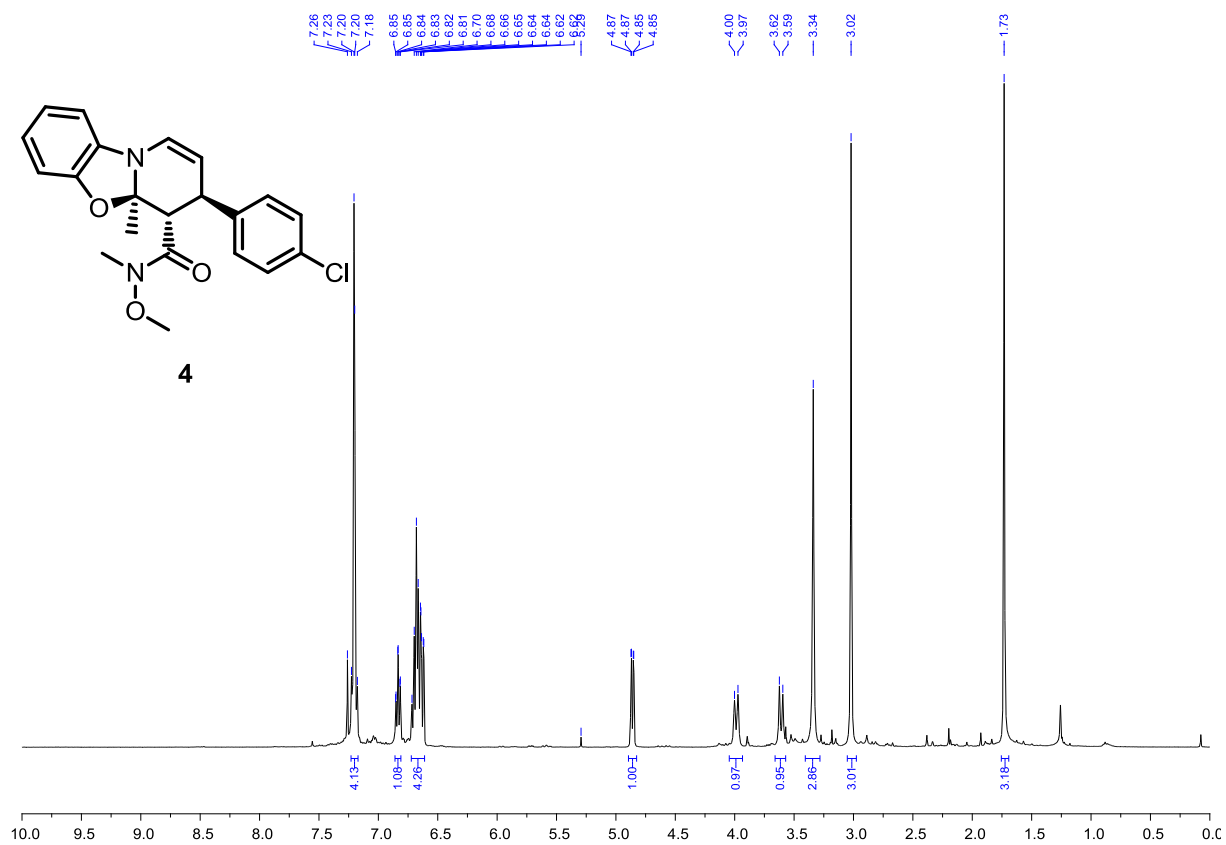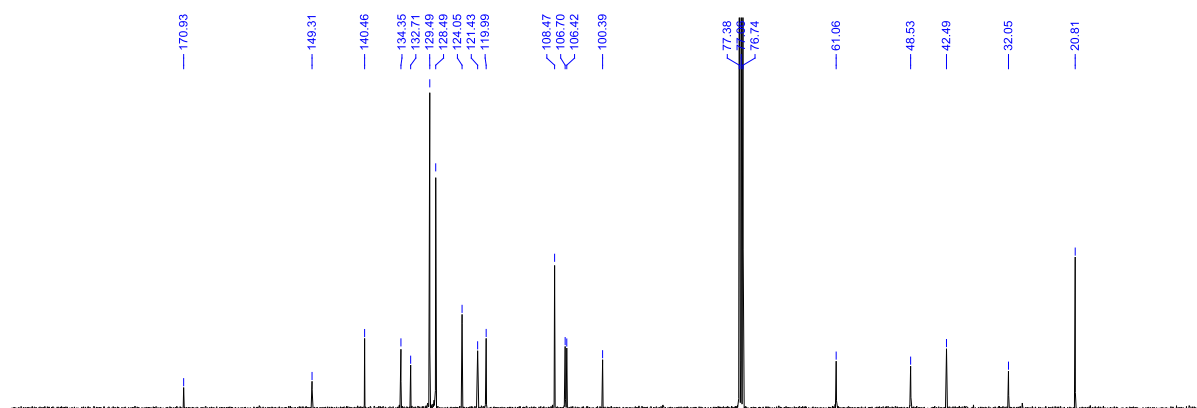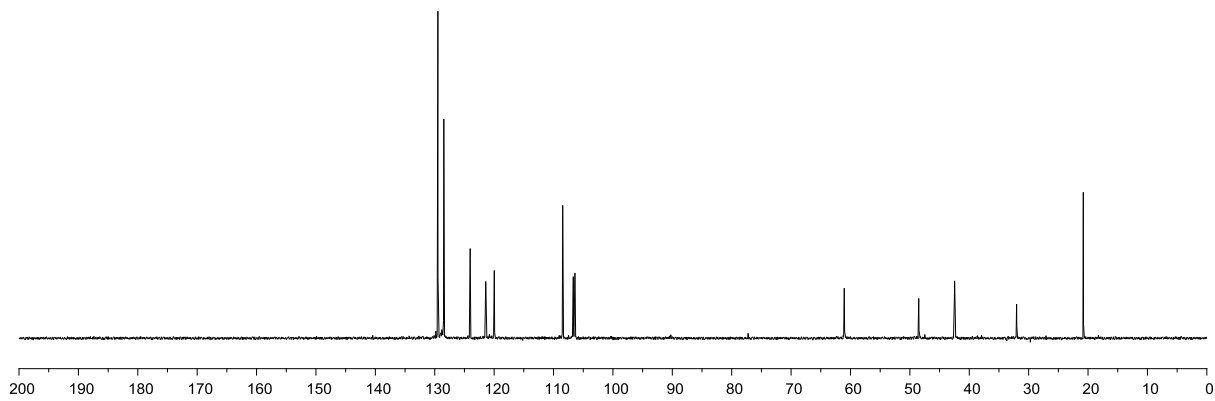

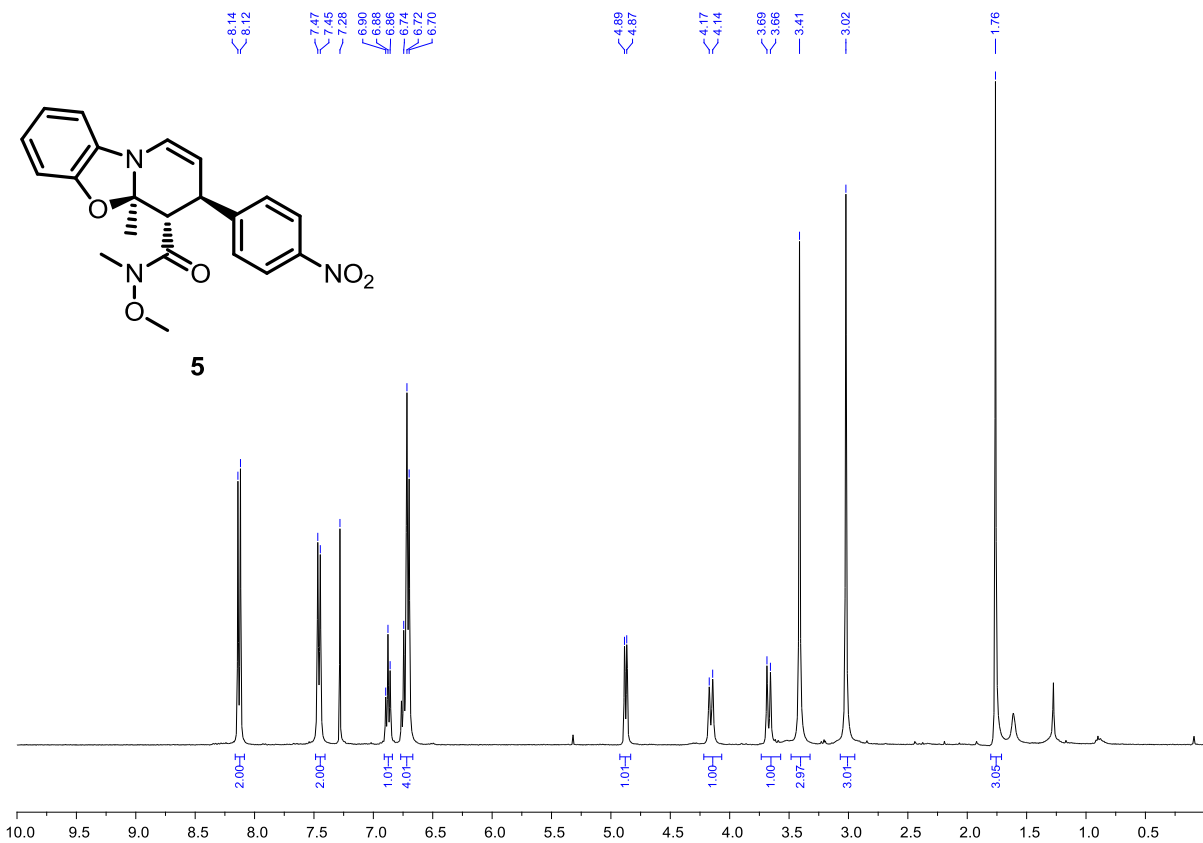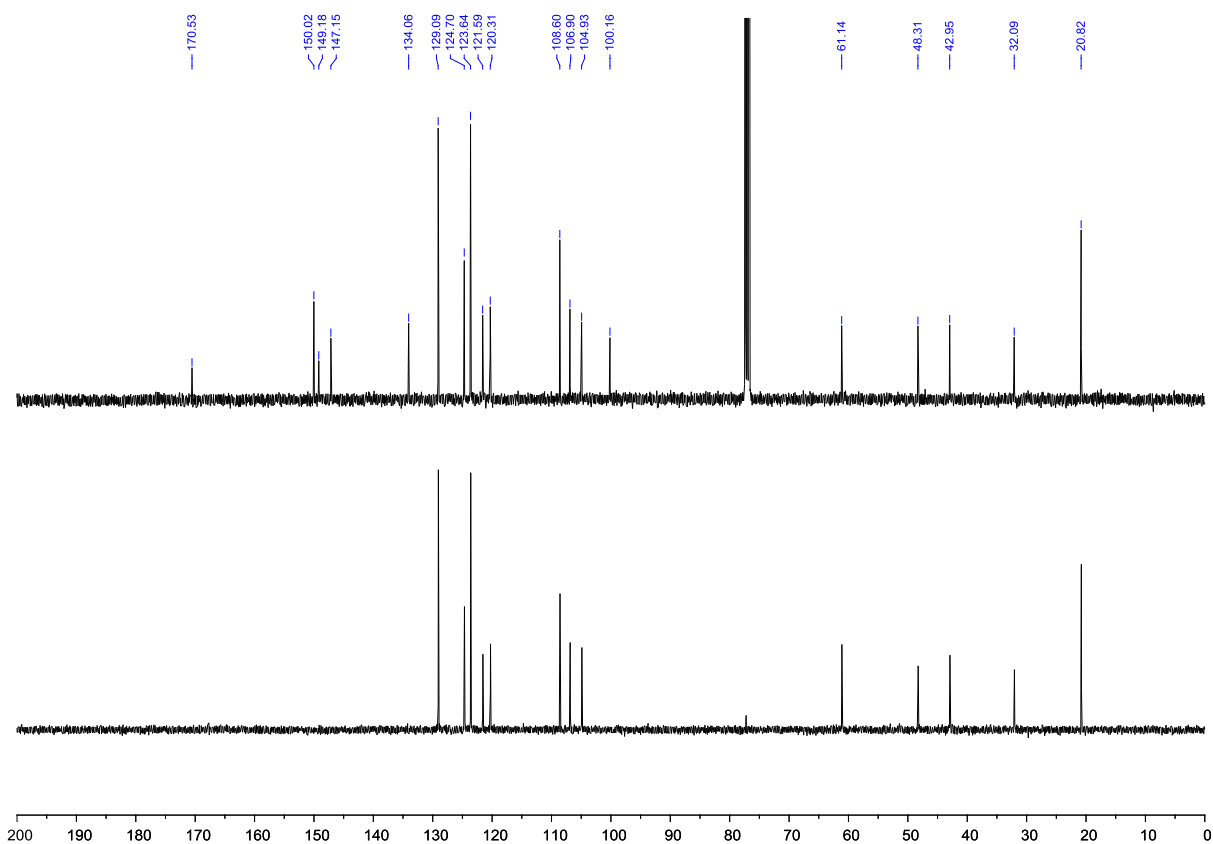

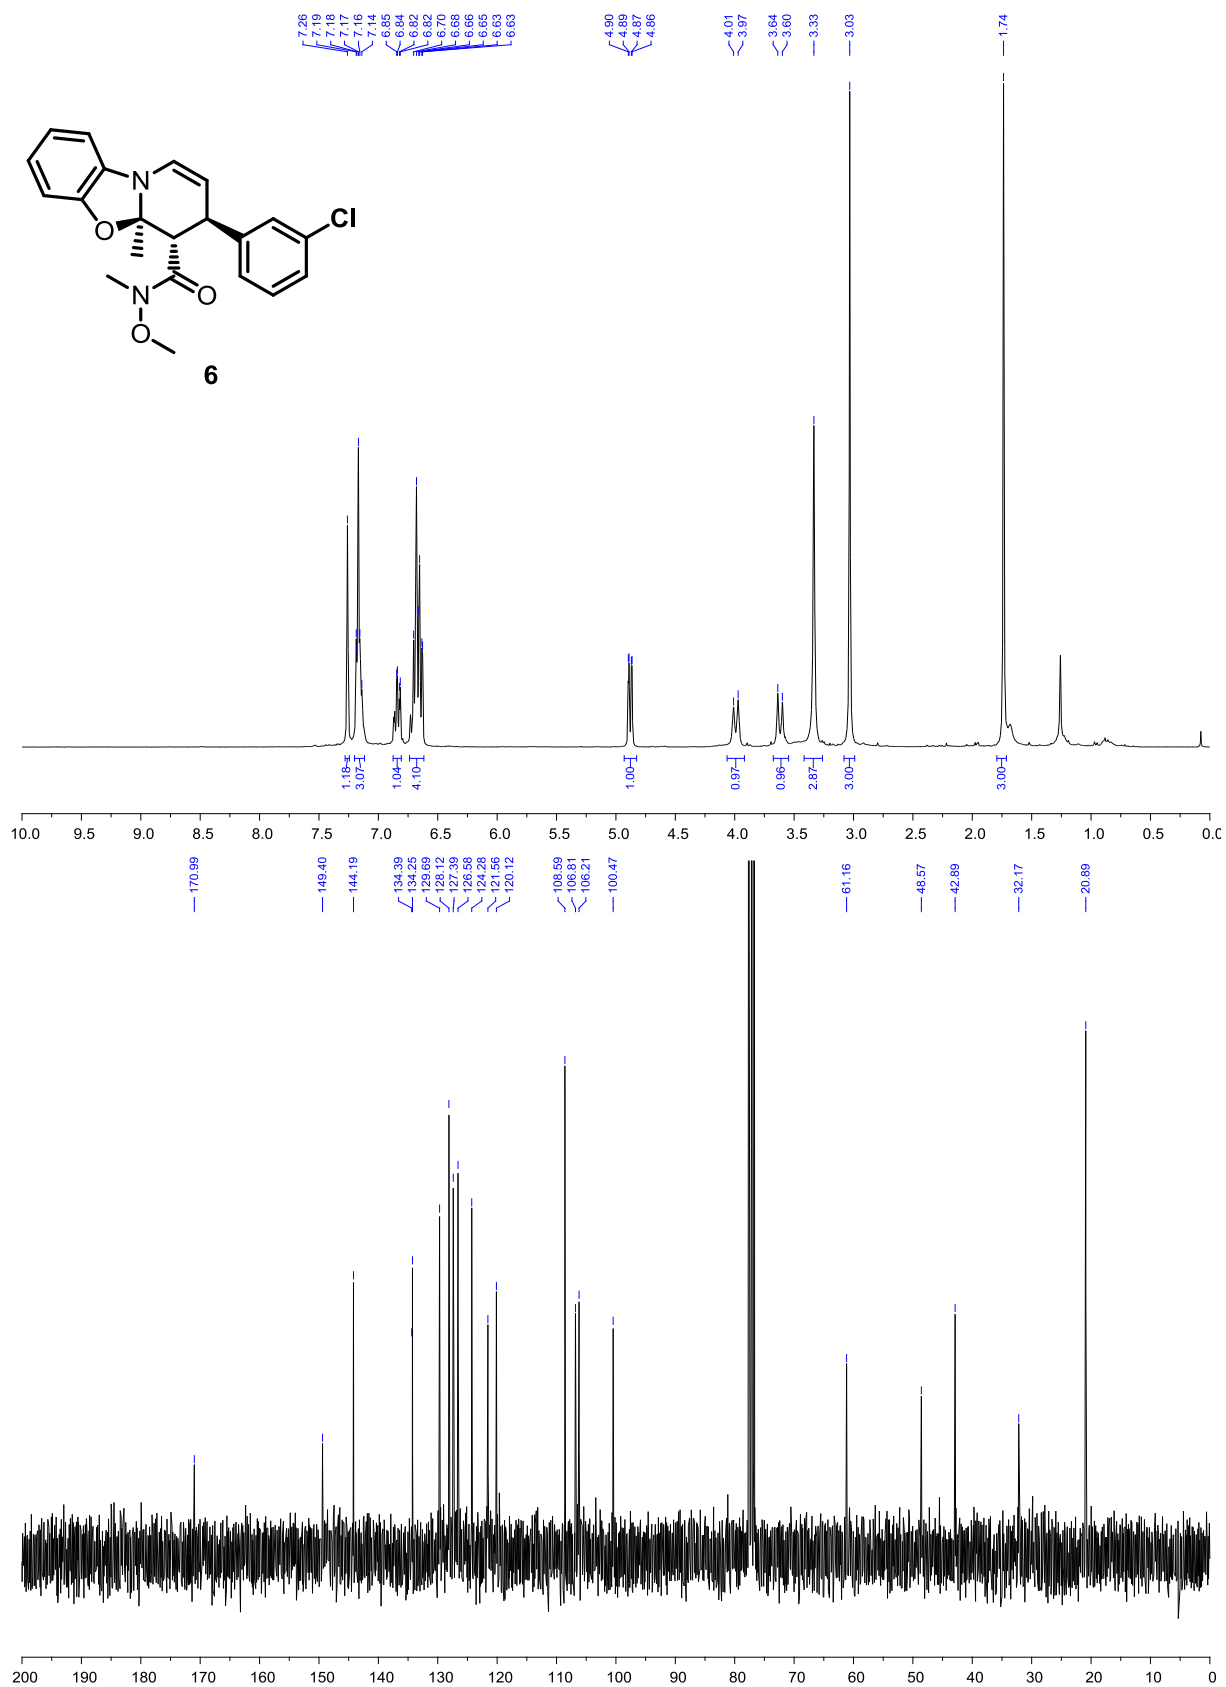

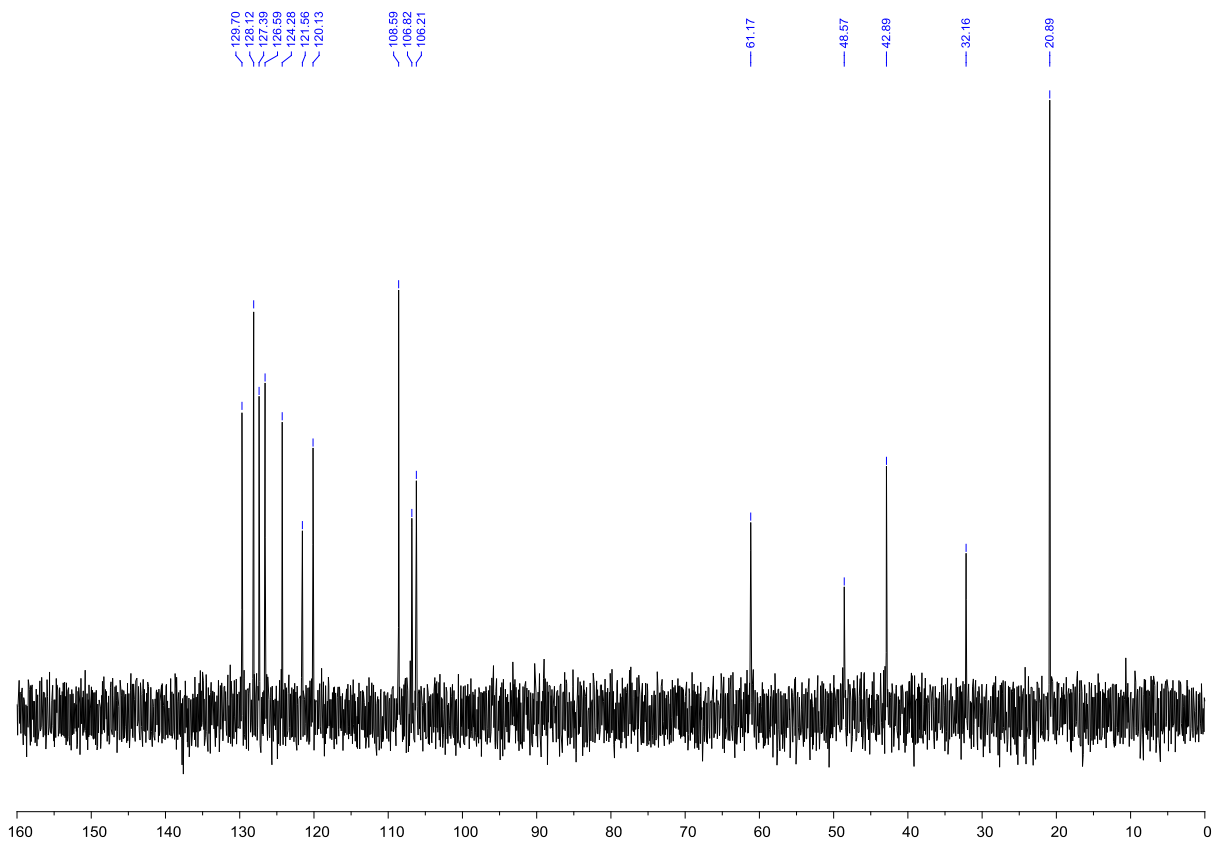



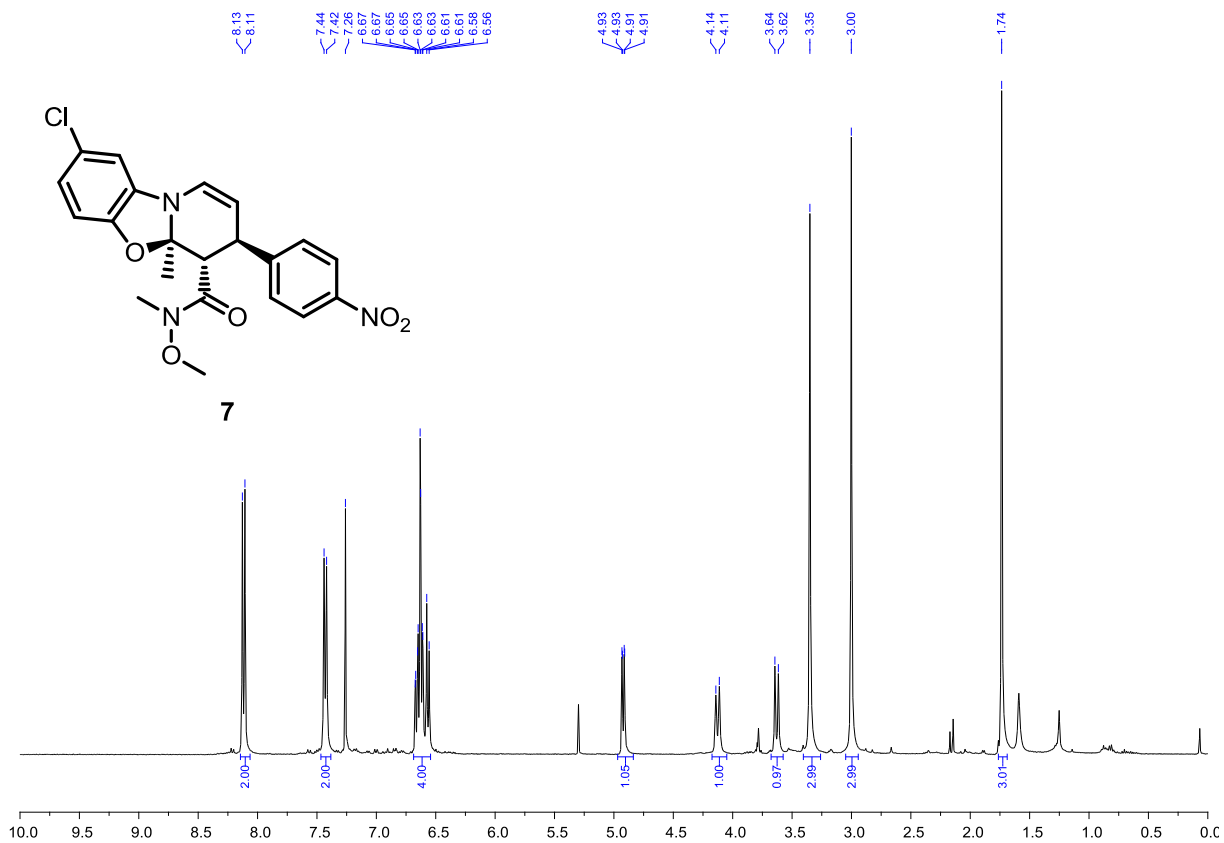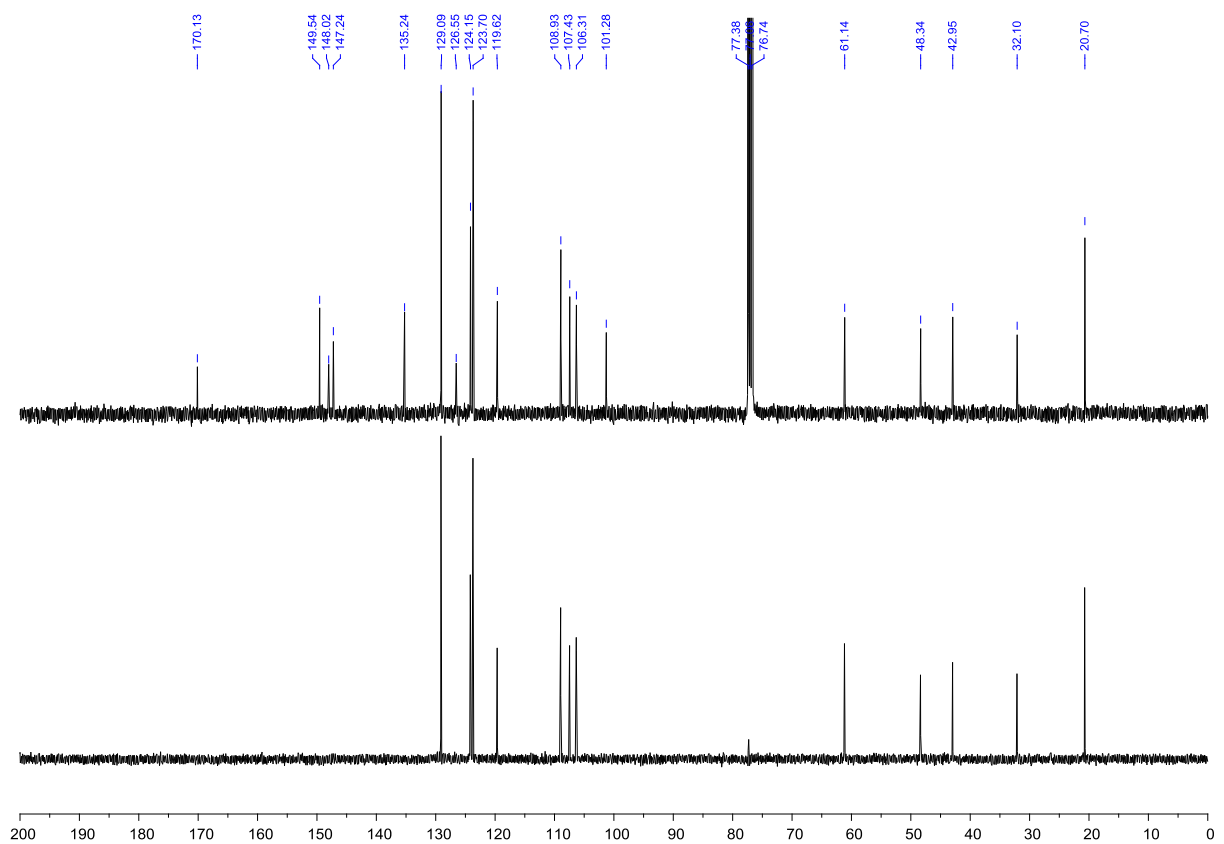

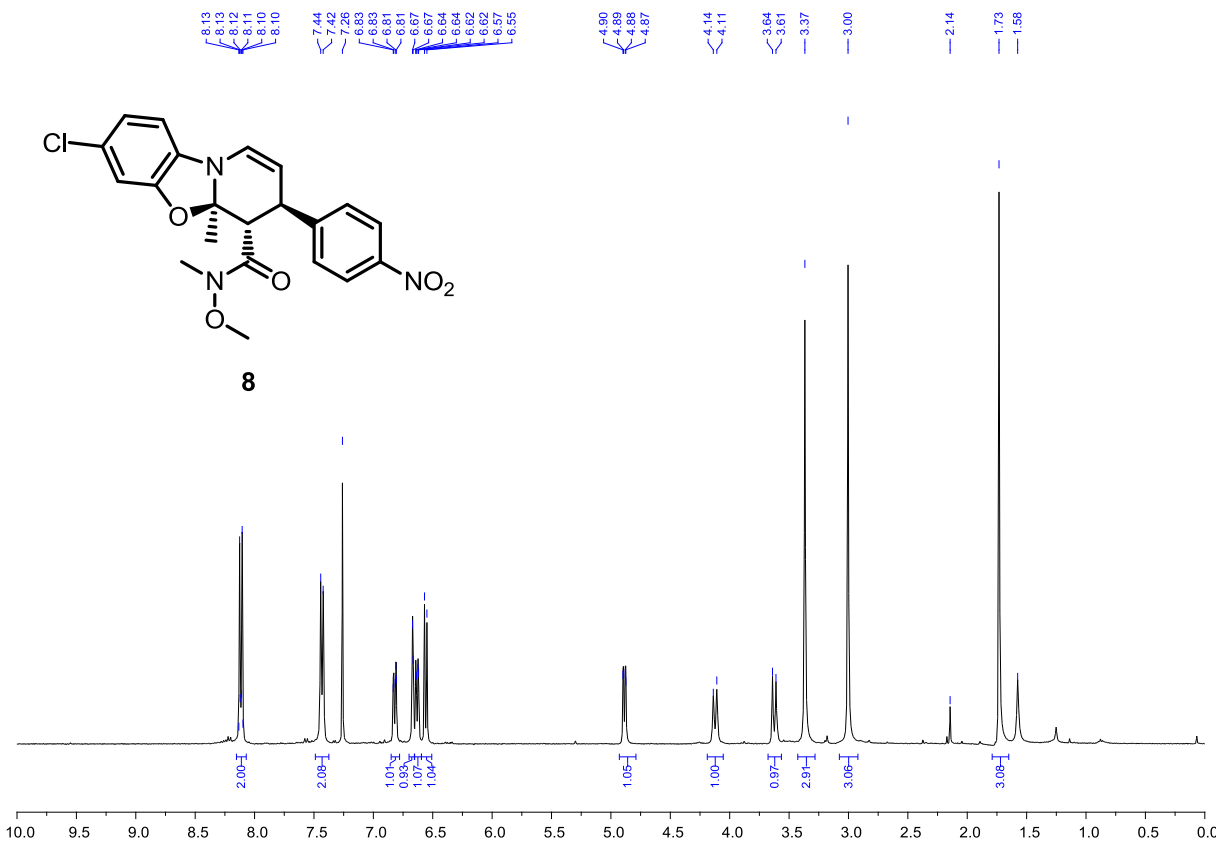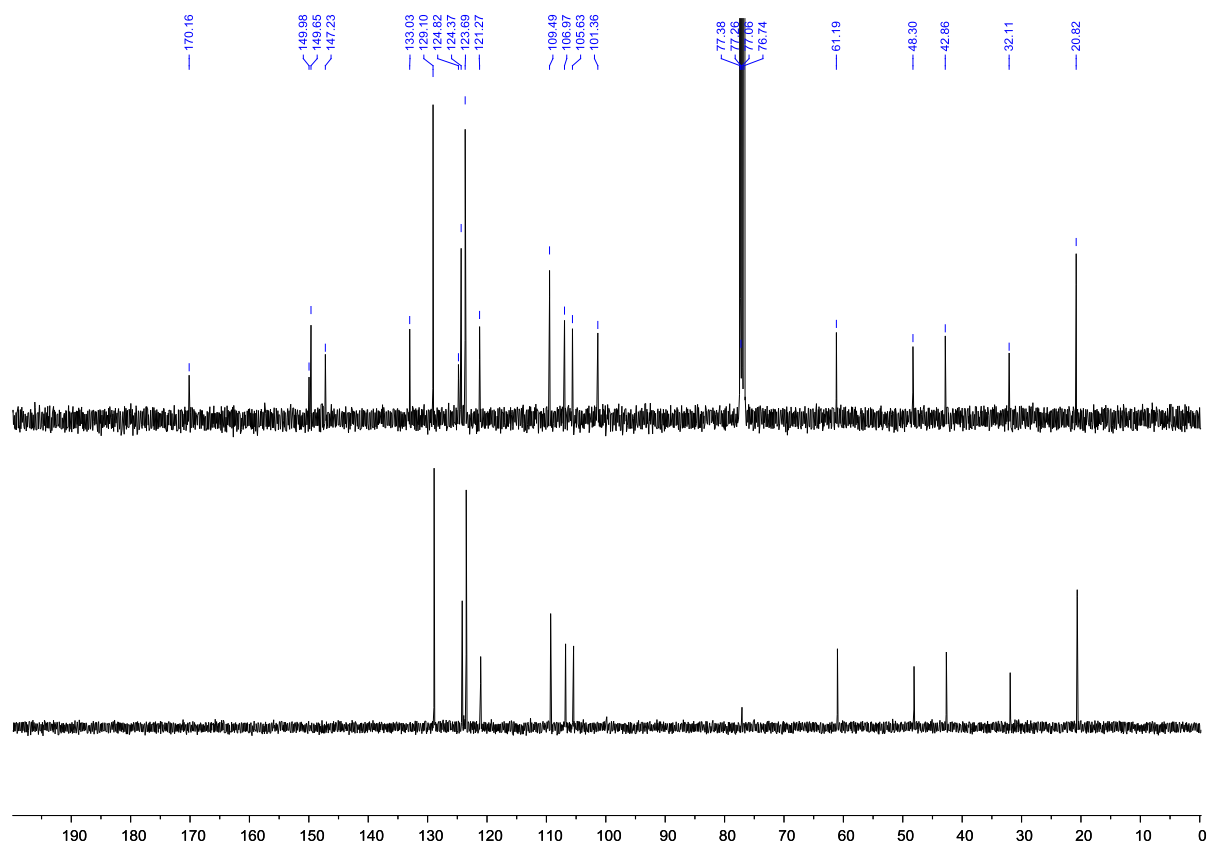

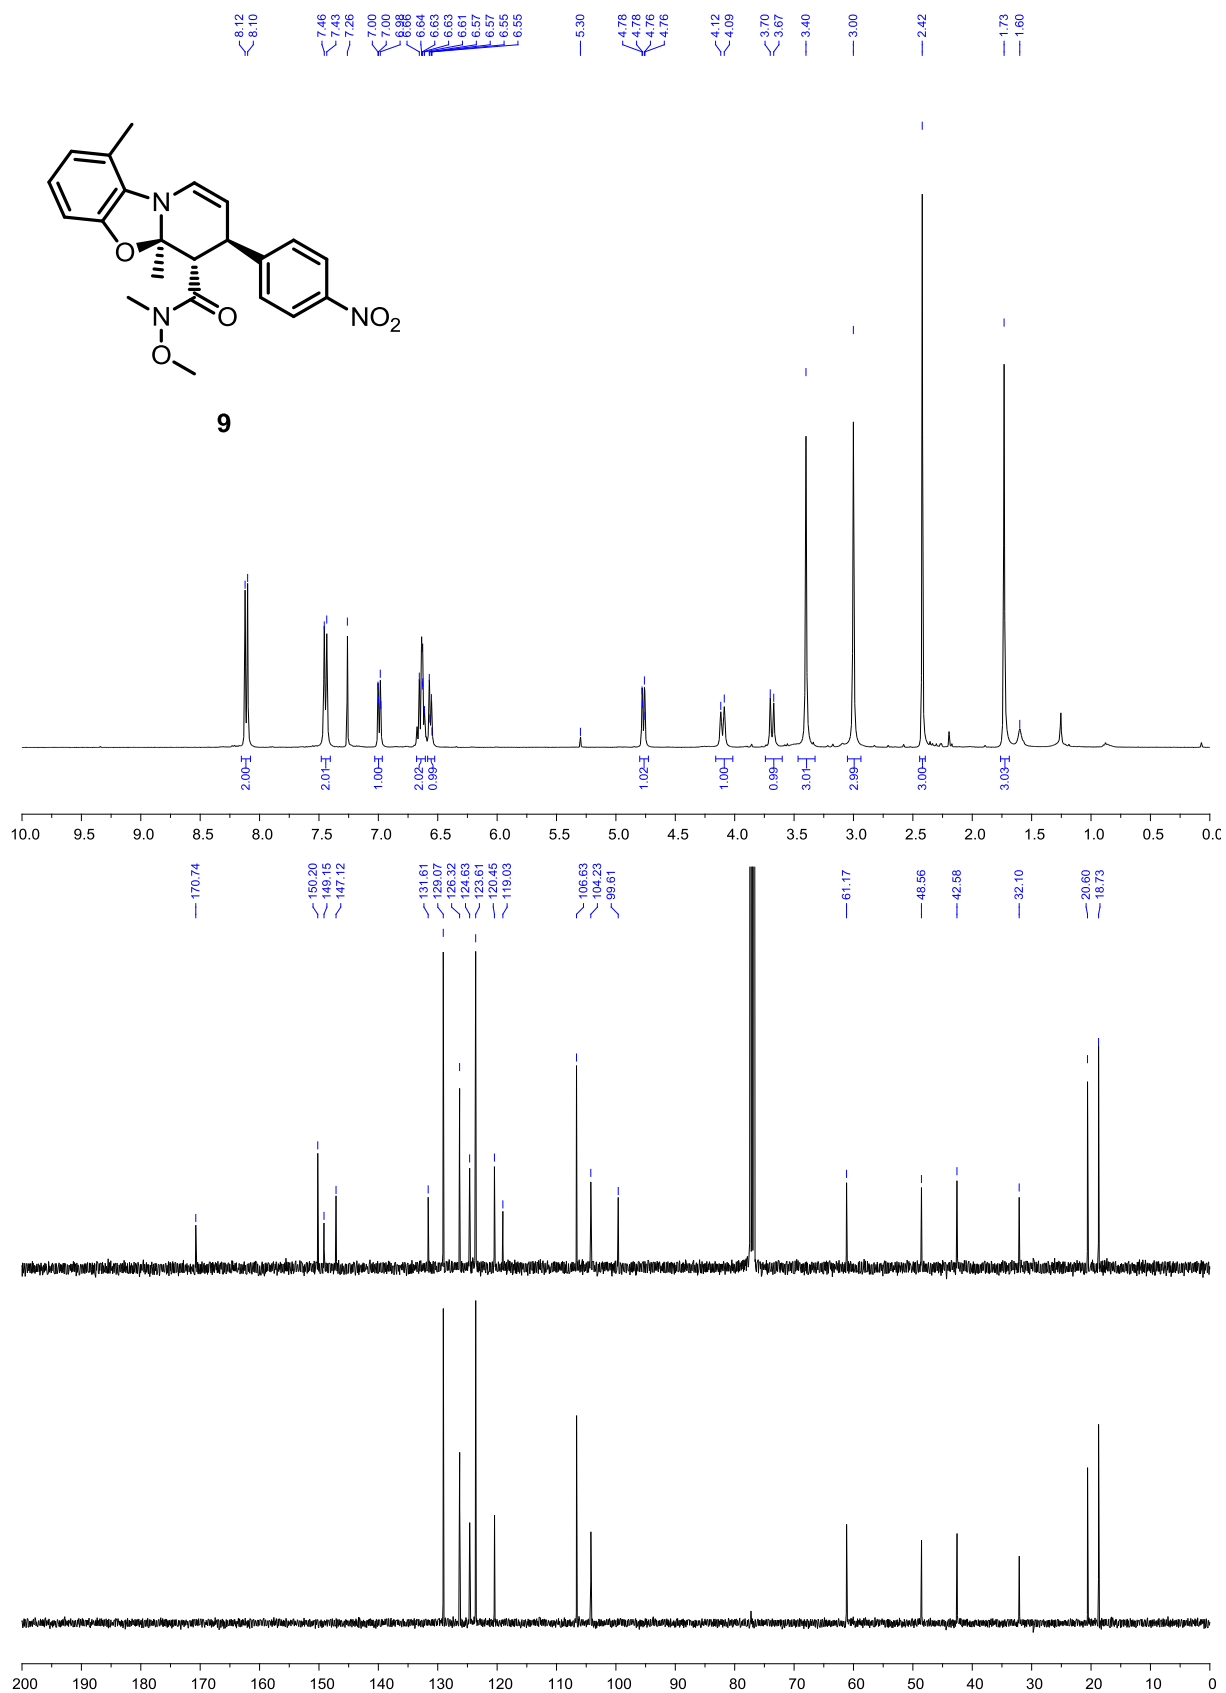

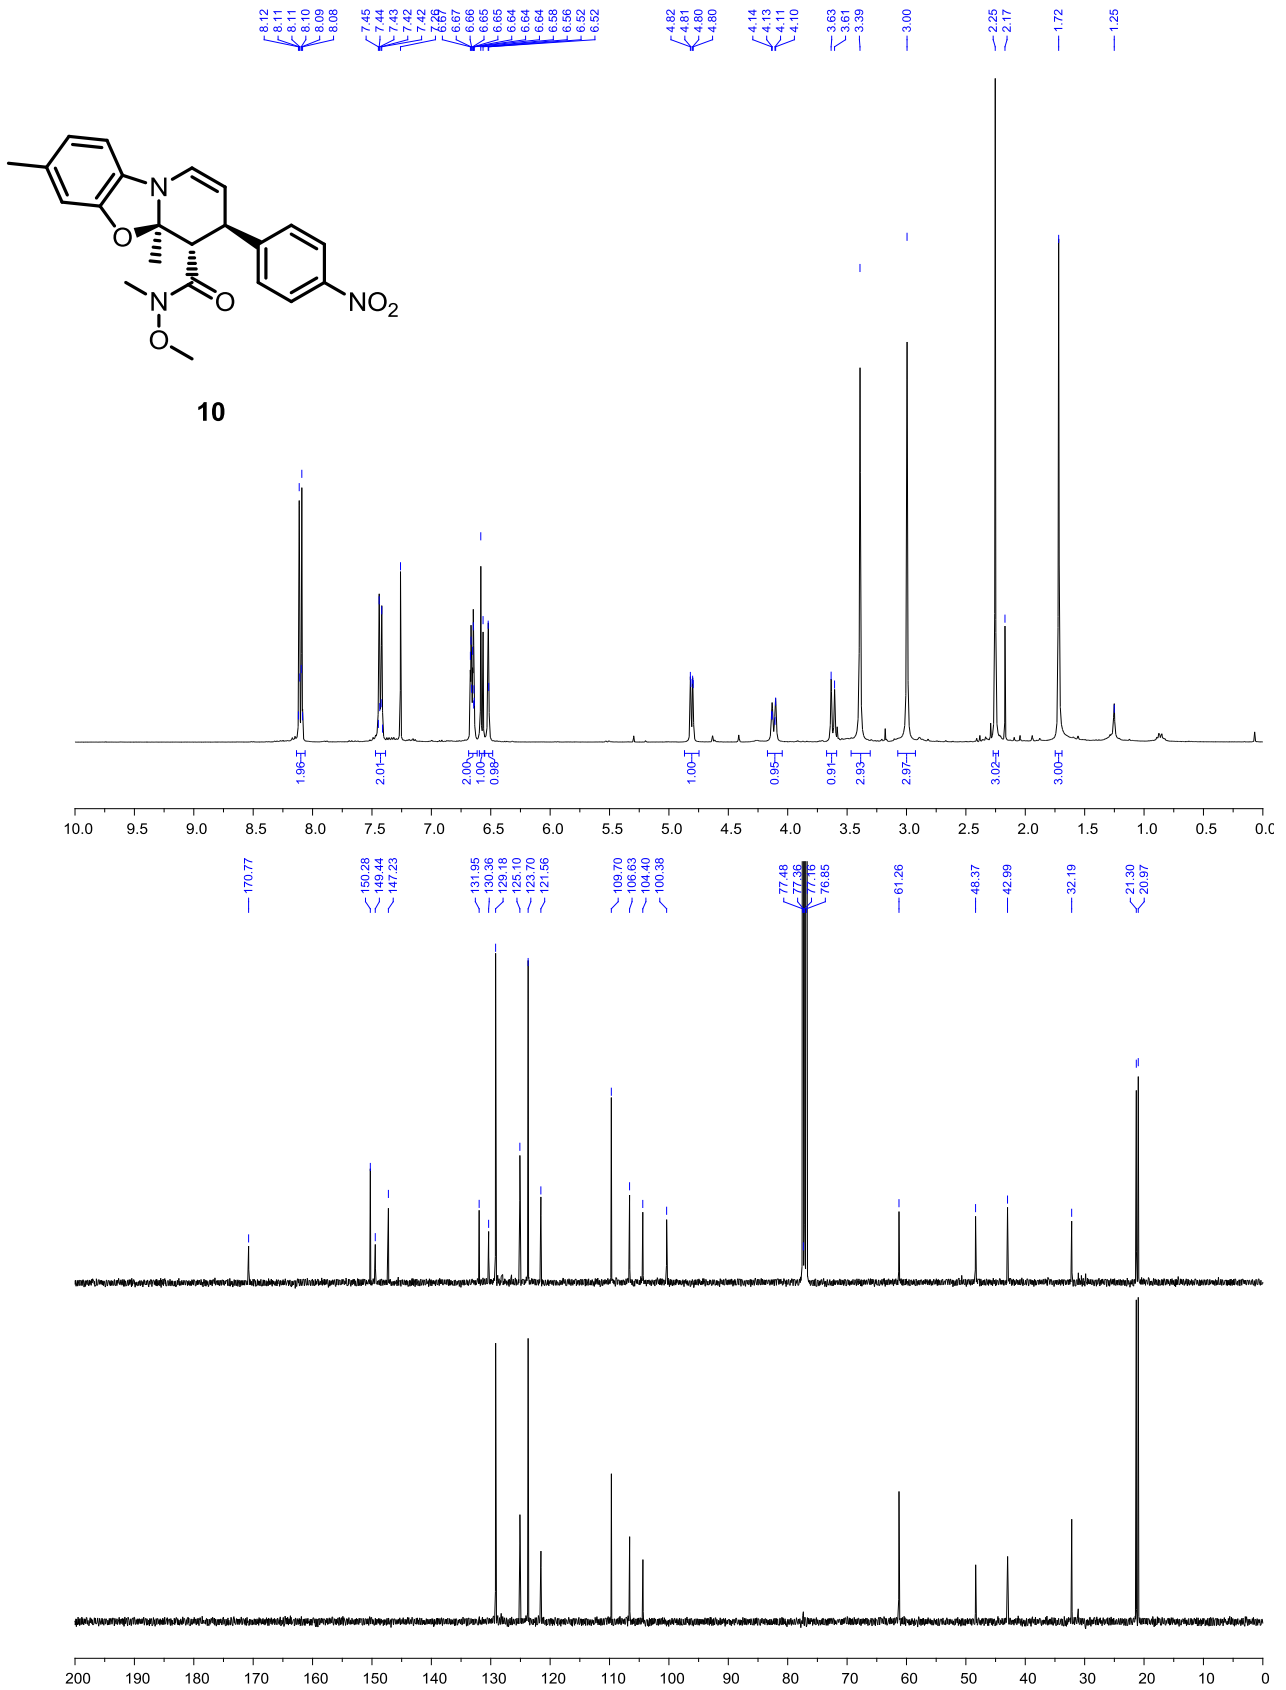

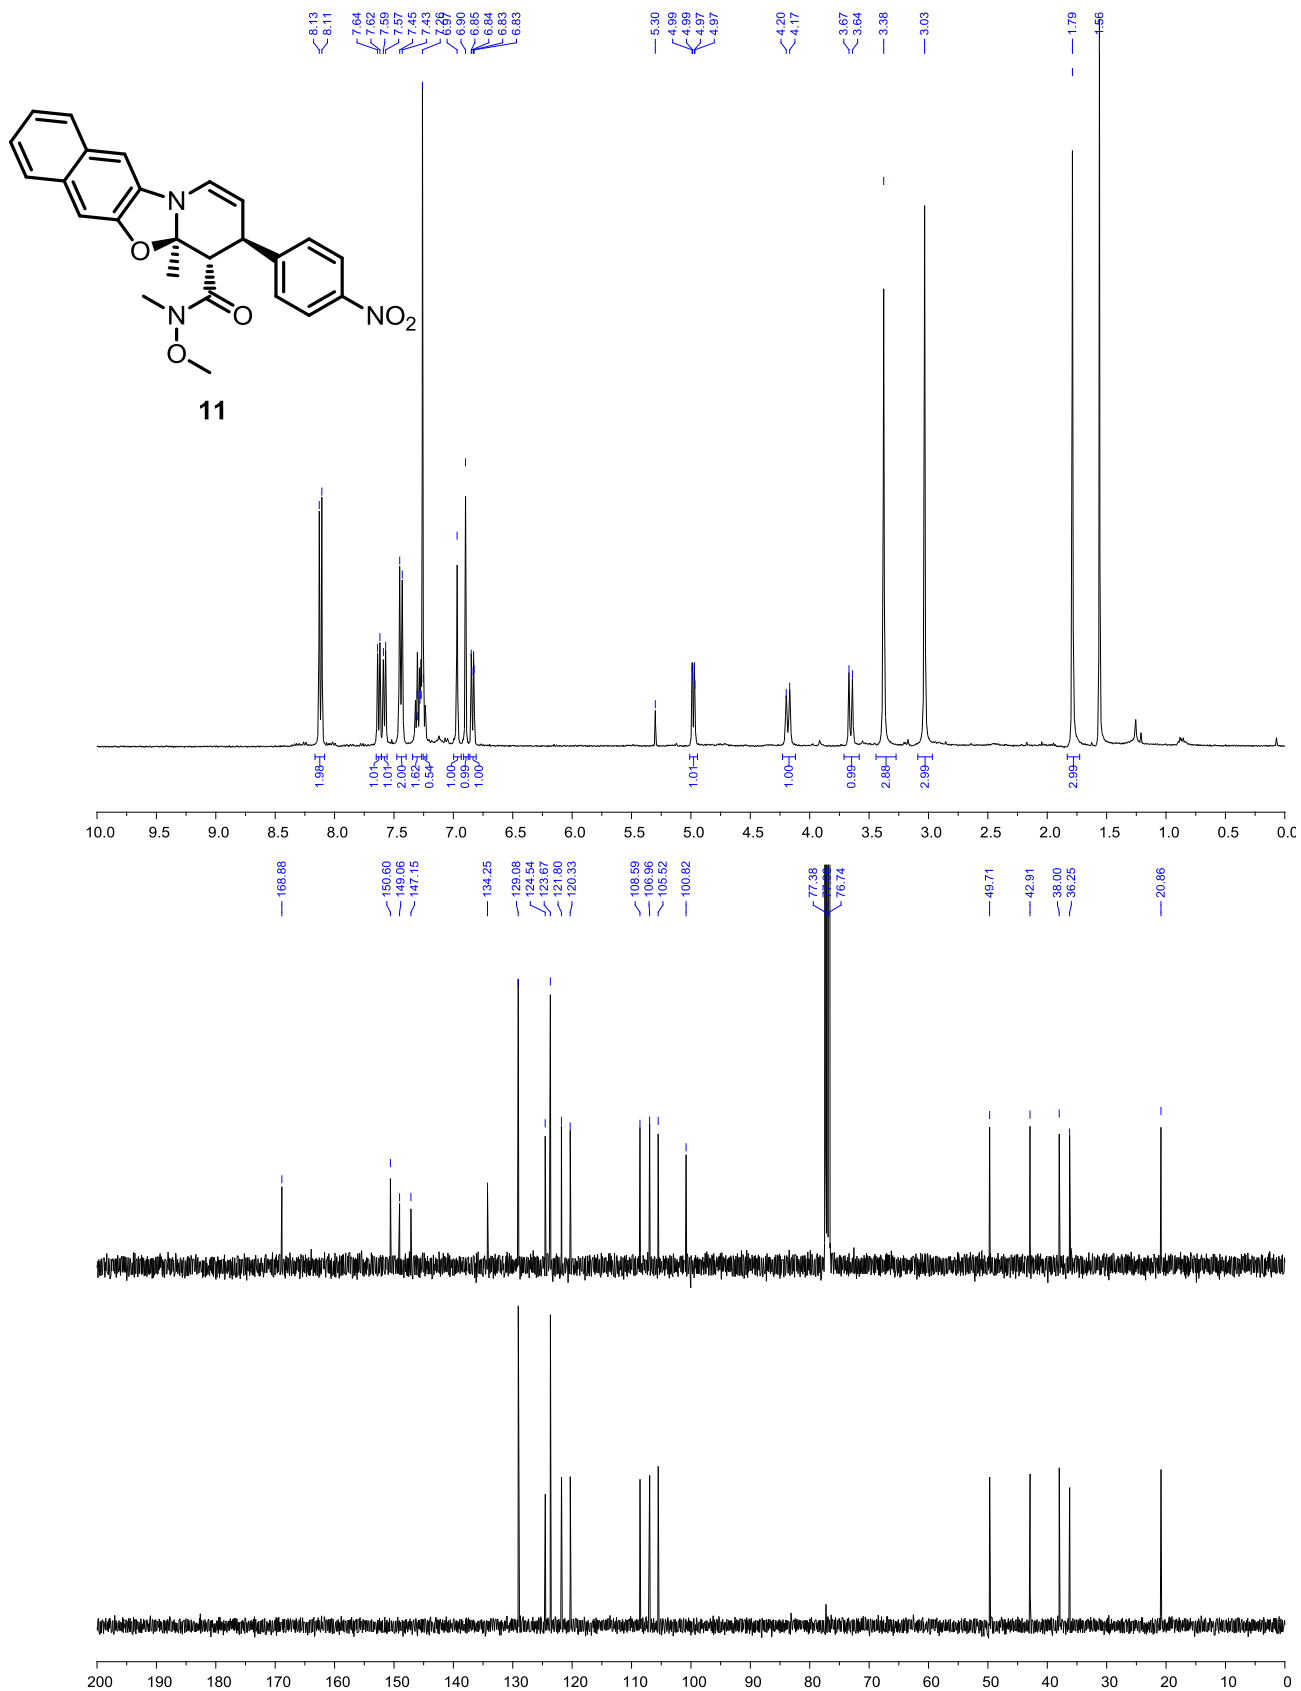

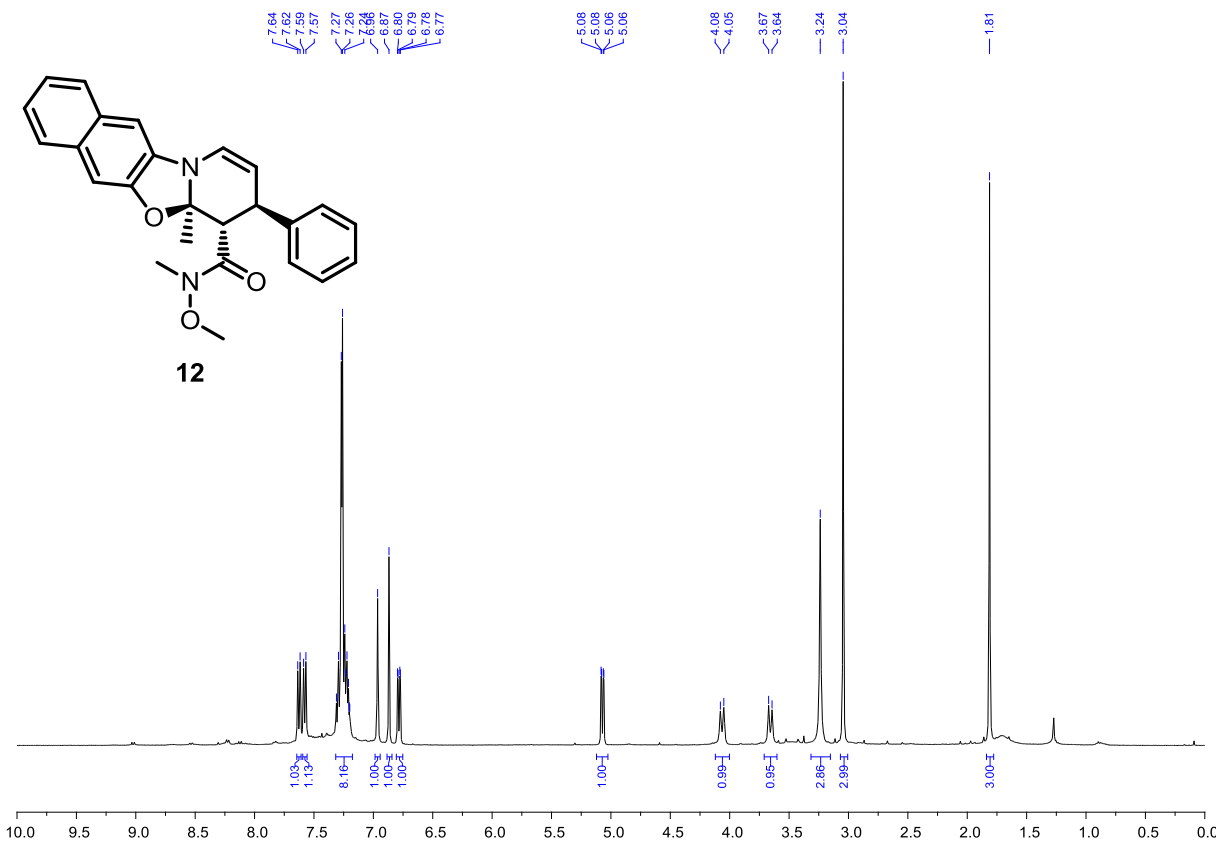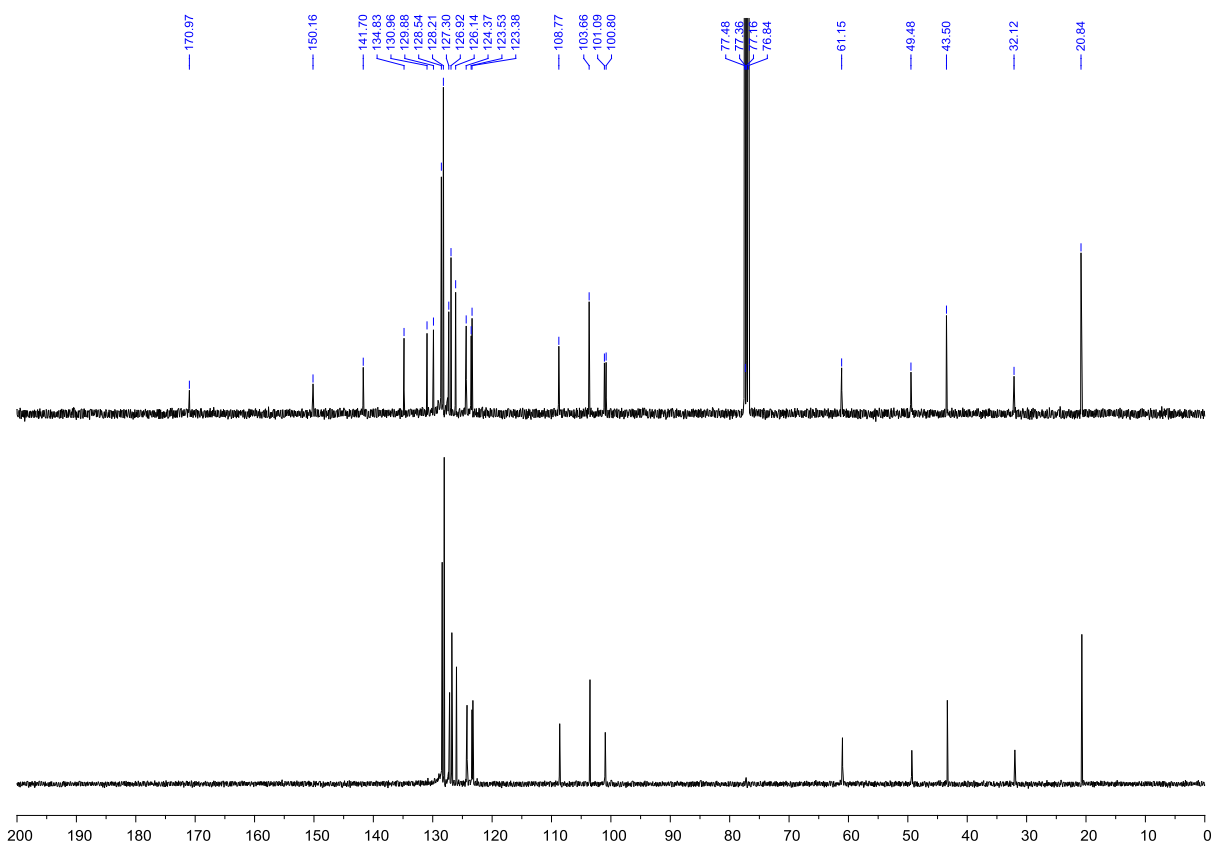

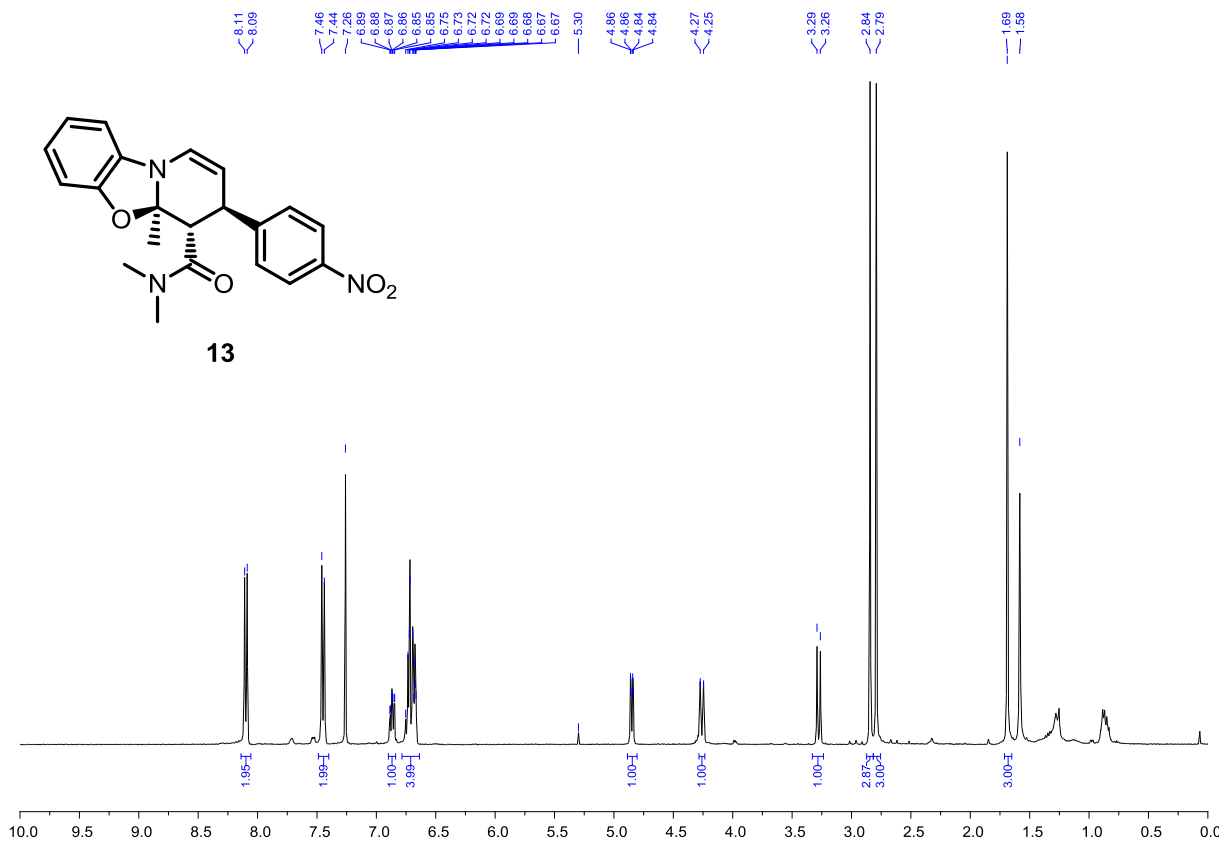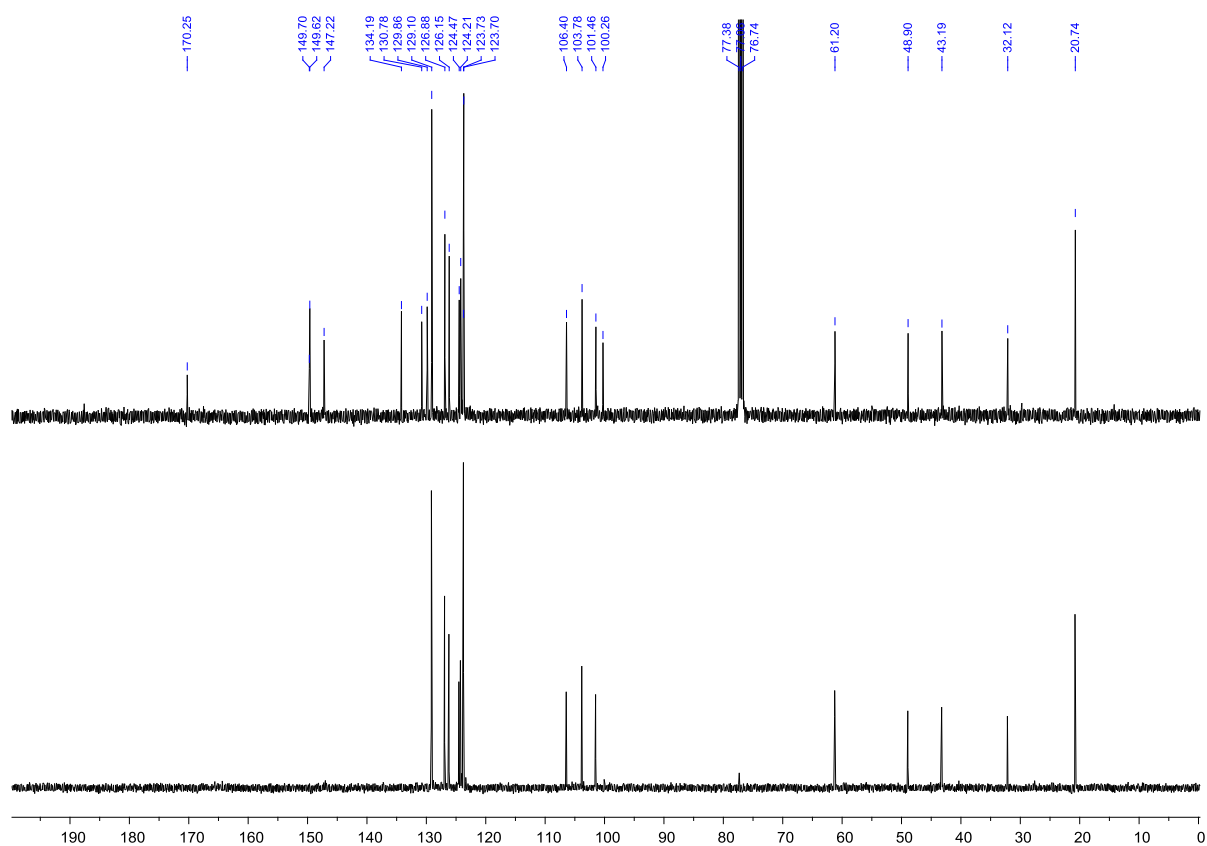

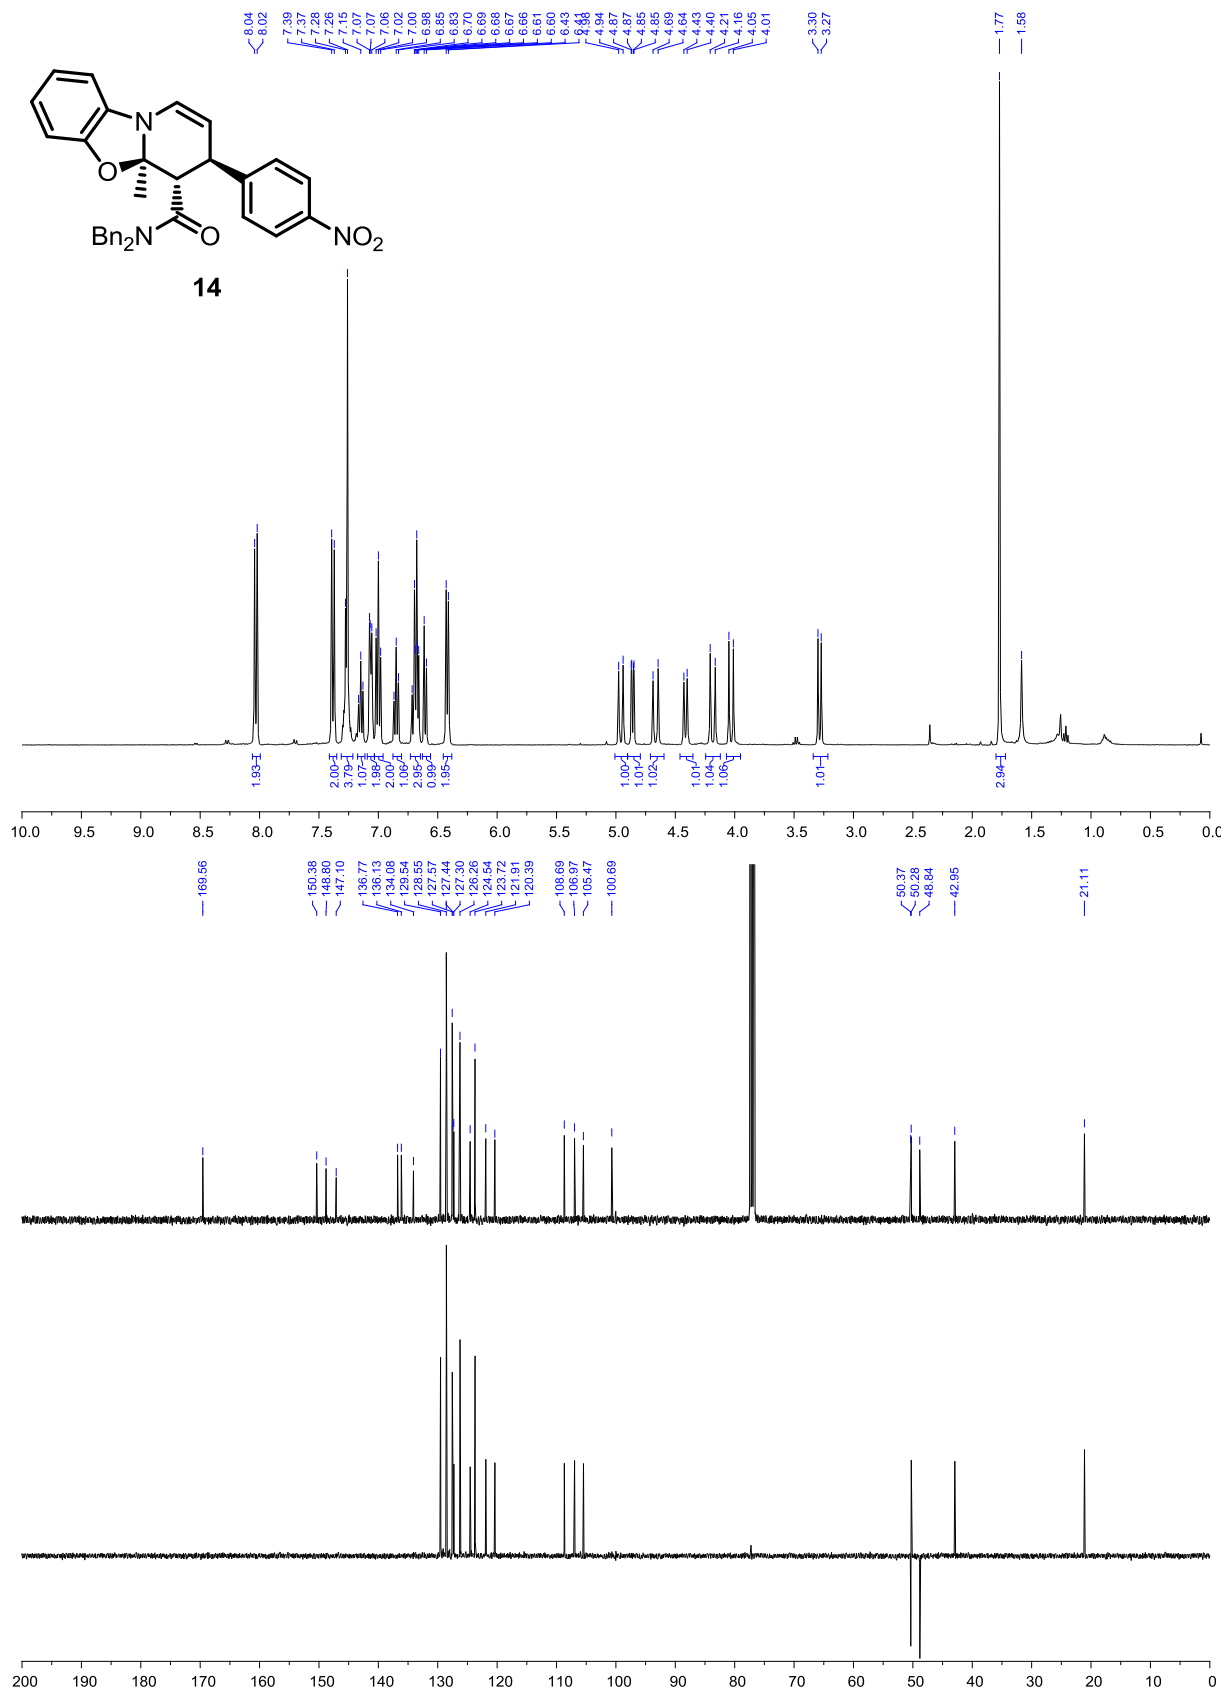



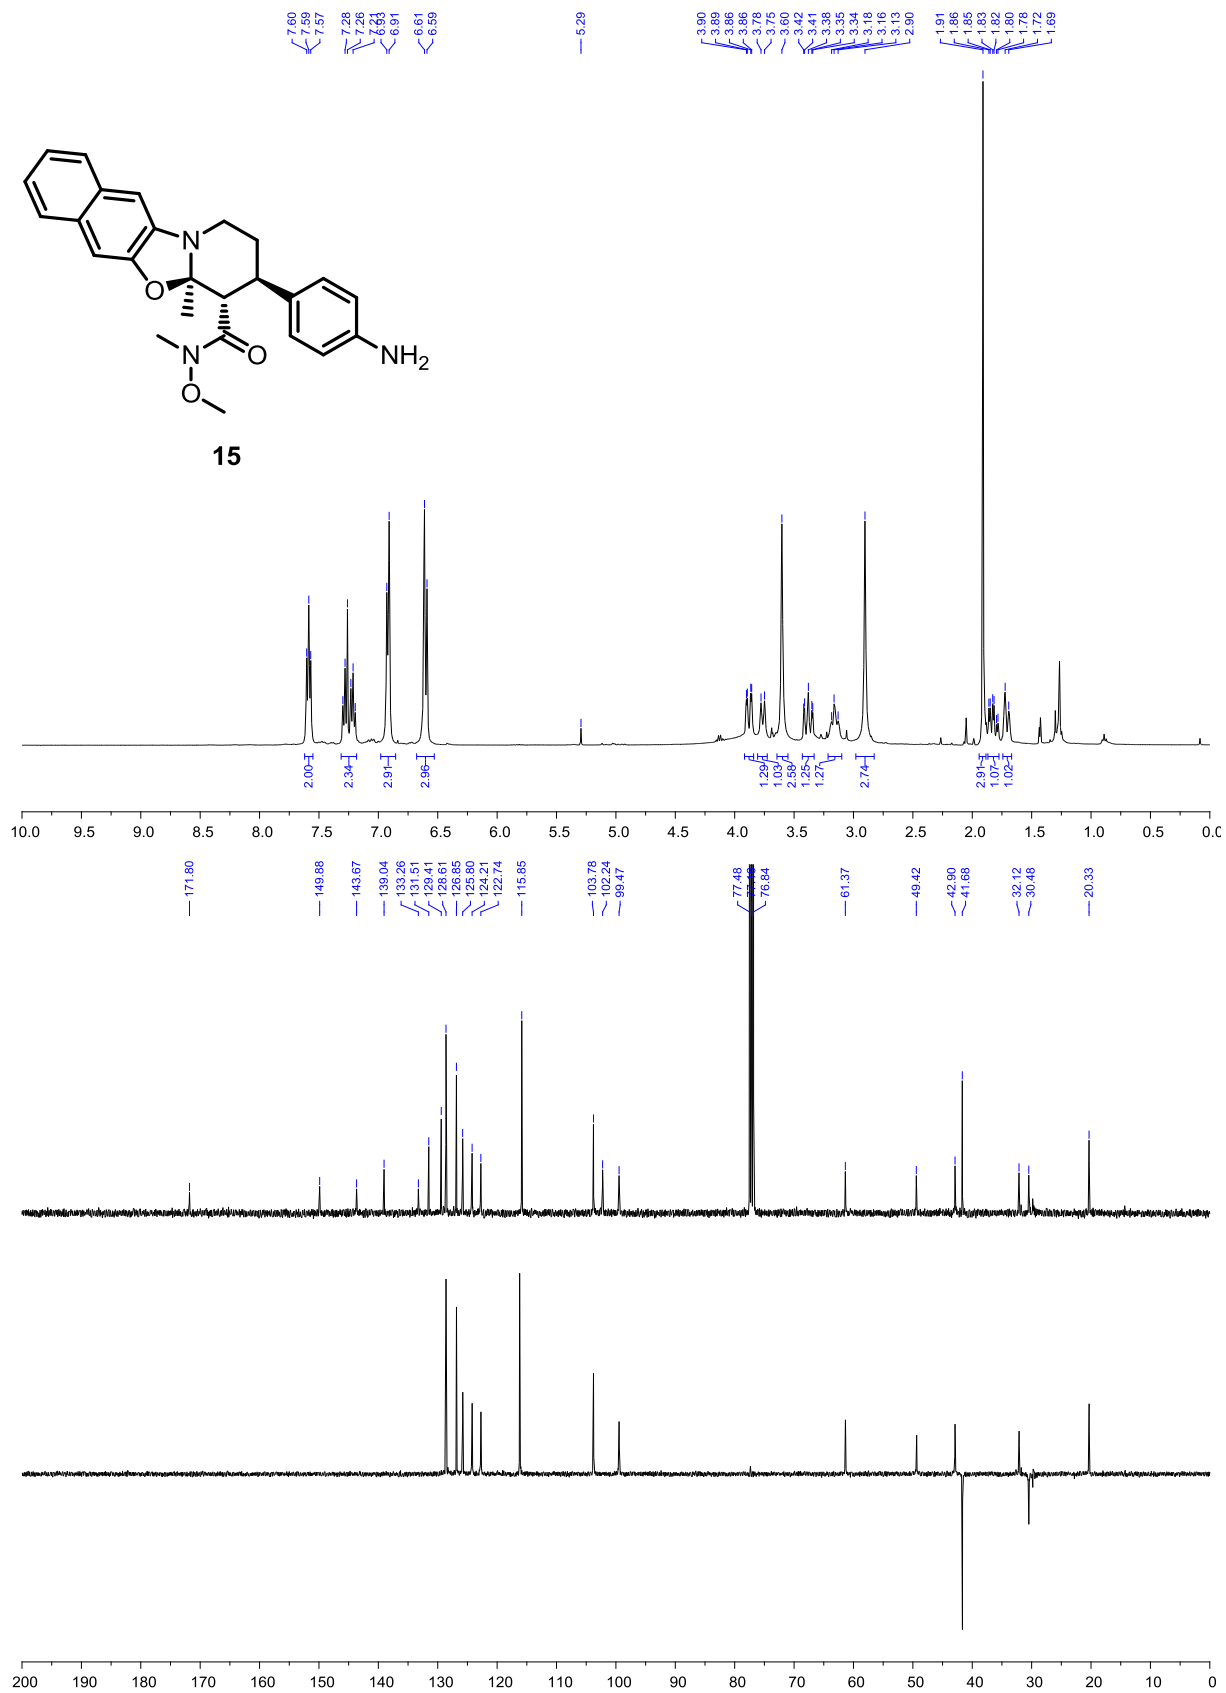

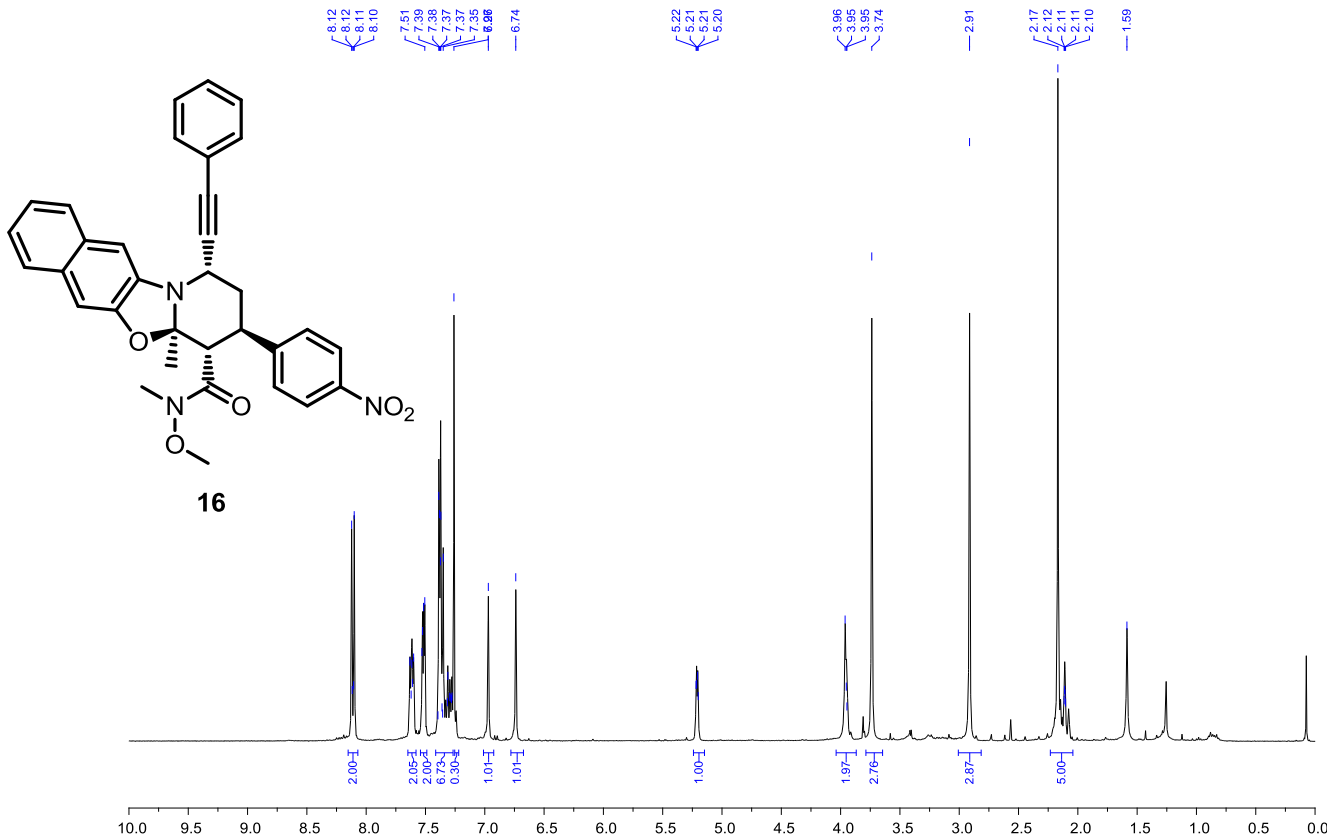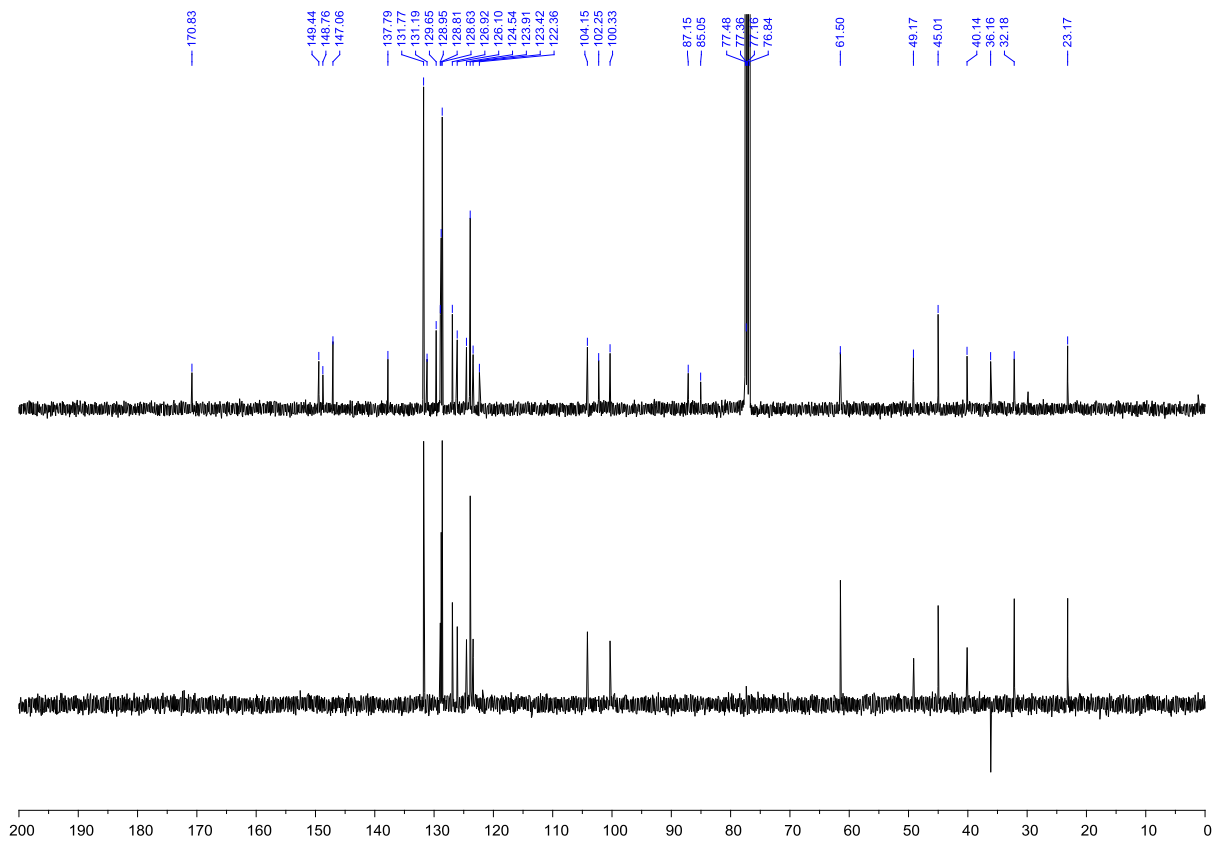

## 6. HPLC TRACES:

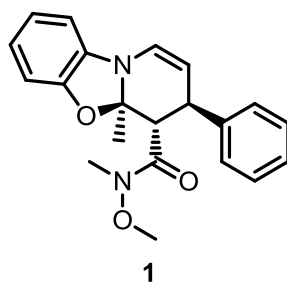

Sample : IIIHD137-dia

Method description : Chiralpak AZ-H, Hexane/Isopropanol 90/10, 1 ml/min, UV 254 nm et CD254nm

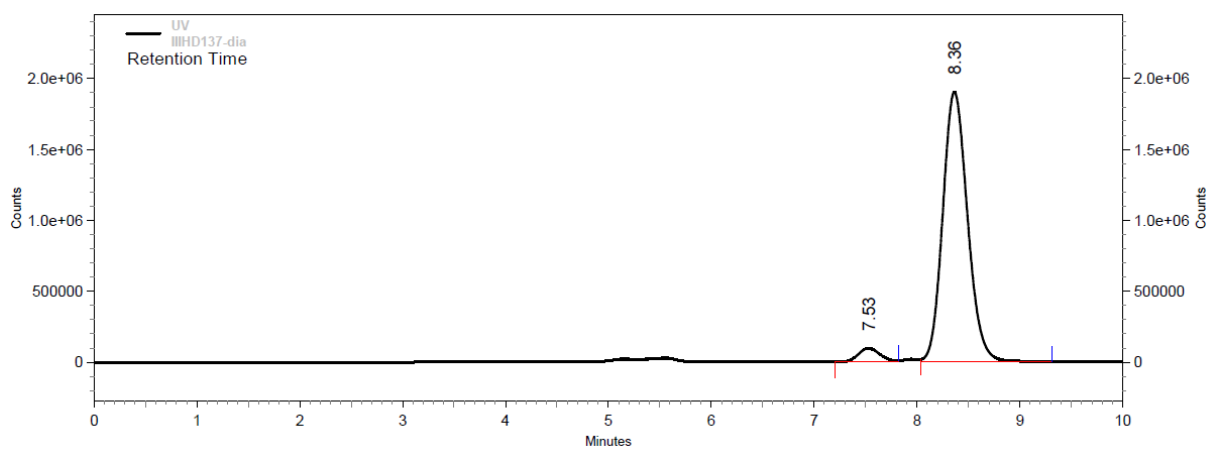

| UV Results     |          |        |                 |             |                  |  |
|----------------|----------|--------|-----------------|-------------|------------------|--|
| Retention Time | Area     | Area % | Capacity factor | Relative RT | Resolution (USP) |  |
| 7.53           | 1429721  | 4.31   | 1.51            | 1.00        | 0.00             |  |
| 8.36           | 31720471 | 95.69  | 1.79            | 1.18        | 1.98             |  |

Sample : IIIHD072-rac-AZ-H

Method description : Chiralpak AZ-H, Hexane/Isopropanol 90/10, 1 ml/min, UV 254 nm et CD254nm

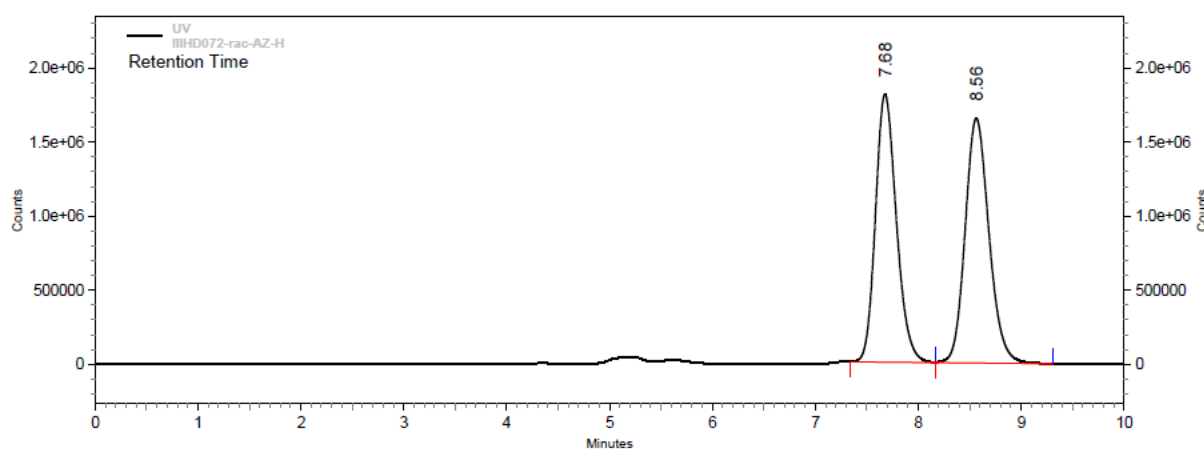

| UV Results     |          |        |                 |             |                  |  |
|----------------|----------|--------|-----------------|-------------|------------------|--|
| Retention Time | Area     | Area % | Capacity factor | Relative RT | Resolution (USP) |  |
| 7.68           | 25595534 | 49.05  | 1.56            | 1.00        | 0.00             |  |
| 8.56           | 26590076 | 50.95  | 1.85            | 1.19        | 2.22             |  |

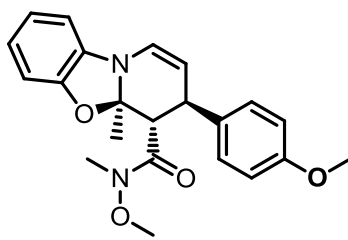

2

Sample : YD200

Method description : Chiralpak AD-H, Heptane/Isopropanol 90/10, 1 ml/min, UV 254 nm et CD254nm

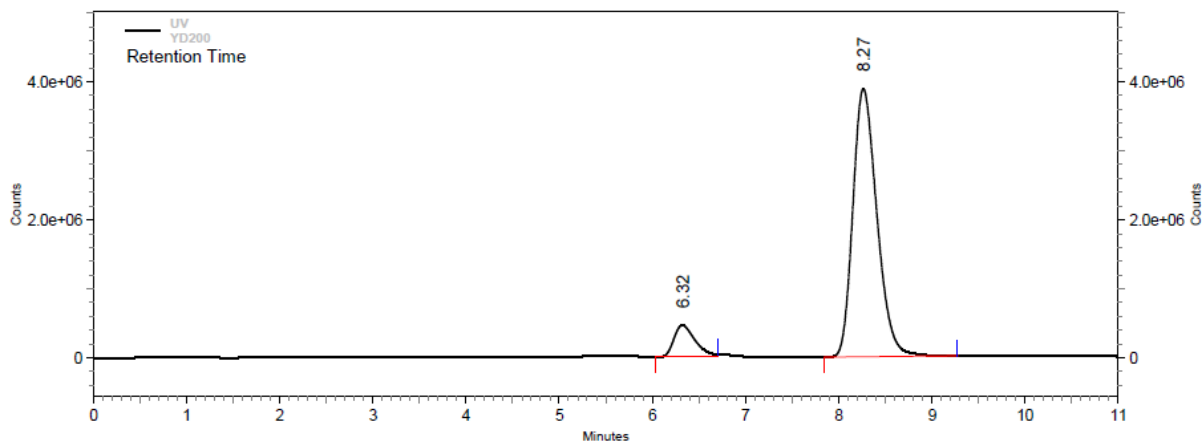

UV Results

| Retention Time | Area     | Area % | Capacity factor | Relative RT | Resolution (USP) |
|----------------|----------|--------|-----------------|-------------|------------------|
| 6.32           | 7289864  | 9.48   | 1.11            | 0.00        | 0.00             |
| 8.27           | 69591756 | 90.52  | 1.76            | 0.00        | 4.32             |

Sample : IIIHD341-rac

Method description : Chiralpak AD-H, Heptane/Isopropanol 90/10, 1 ml/min, UV 254 nm et CD254nm

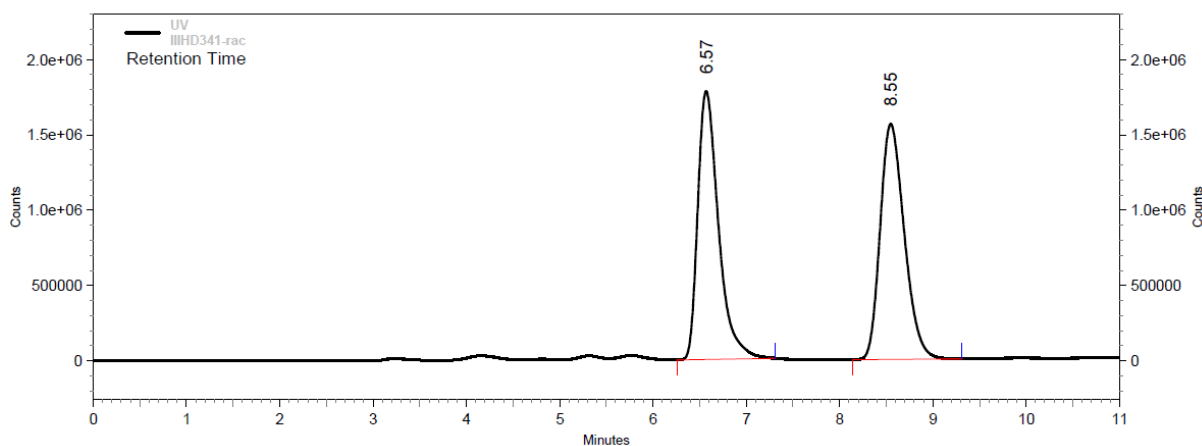

UV Results

| Retention Time | Area     | Area % | Capacity factor | Relative RT | Resolution (USP) |
|----------------|----------|--------|-----------------|-------------|------------------|
| 6.57           | 27458047 | 49.41  | 1.19            | 0.00        | 0.00             |
| 8.55           | 28109338 | 50.59  | 1.85            | 0.00        | 4.51             |

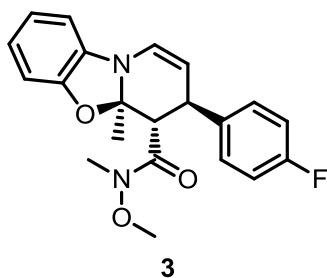

Sample : YD201

Method description : Chiralpak IF, Heptane/Isopropanol 95/5, 1 ml/min, DAD + CD254nm

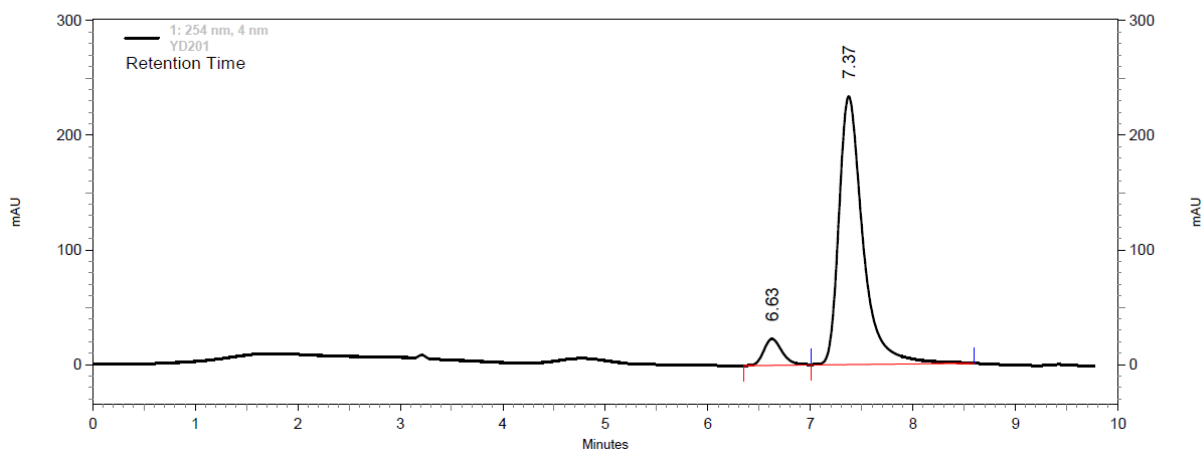

| Retention Time | Area     | Area % | Capacity factor | Relative RT | Resolution (USP) |
|----------------|----------|--------|-----------------|-------------|------------------|
| 6.63           | 1149151  | 7.01   | 1.21            | 1.00        | 0.00             |
| 7.37           | 15252742 | 92.99  | 1.46            | 1.21        | 2.05             |

Sample : IIIHD296-rac

Method description : Chiralpak IF, Heptane/Isopropanol 95/5, 1 ml/min, DAD + CD254nm

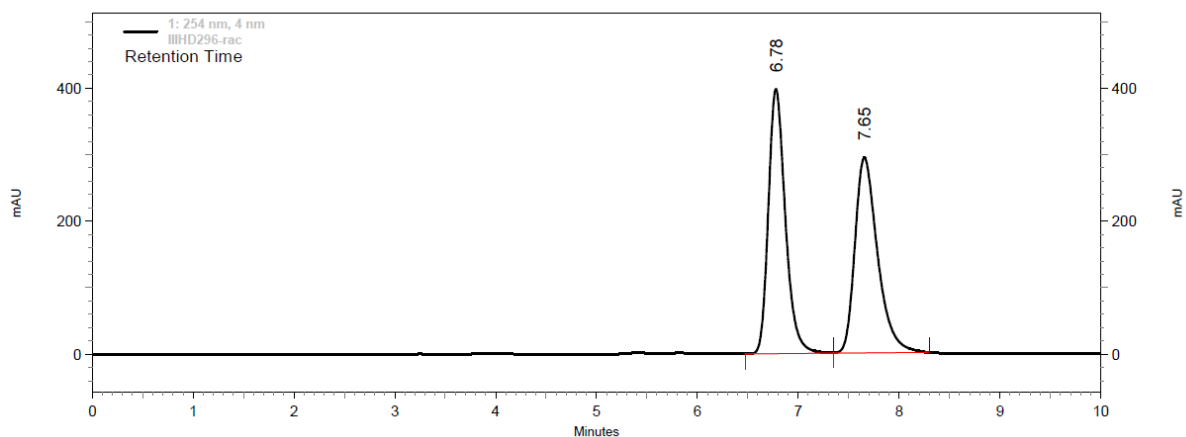

| Retention Time | Area     | Area % | Capacity factor | Relative RT | Resolution (USP) |
|----------------|----------|--------|-----------------|-------------|------------------|
| 6.78           | 18645957 | 50.39  | 1.26            | 1.00        | 0.00             |
| 7.65           | 18356588 | 49.61  | 1.55            | 1.23        | 2.46             |

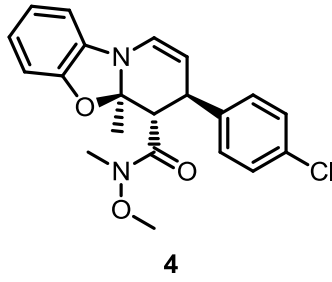

Sample : YD219

Method description : Chiralpak AZ-H, Heptane/ethanol 90/10, 1 ml/min, UV 254 nm et CD254nm

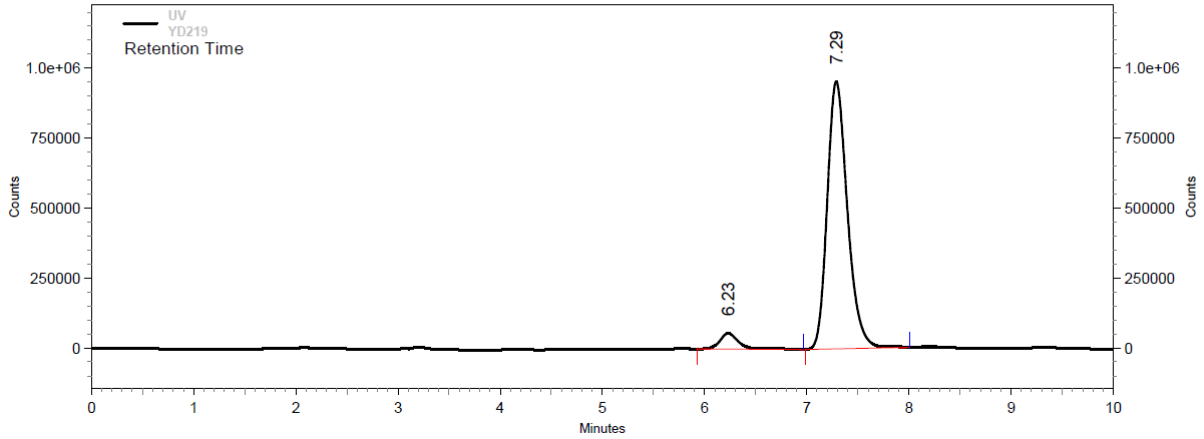

UV Results

| Retention Time | Area     | Area % | Capacity factor | Relative RT | Resolution (USP) |
|----------------|----------|--------|-----------------|-------------|------------------|
| 6.23           | 768439   | 5.53   | 1.08            | 1.00        | 0.00             |
| 7.29           | 13124214 | 94.47  | 1.43            | 1.33        | 3.11             |

Sample : YD230-rac

Method description : Chiralpak AZ-H, Heptane/ethanol 90/10, 1 ml/min, UV 254 nm et CD254nm

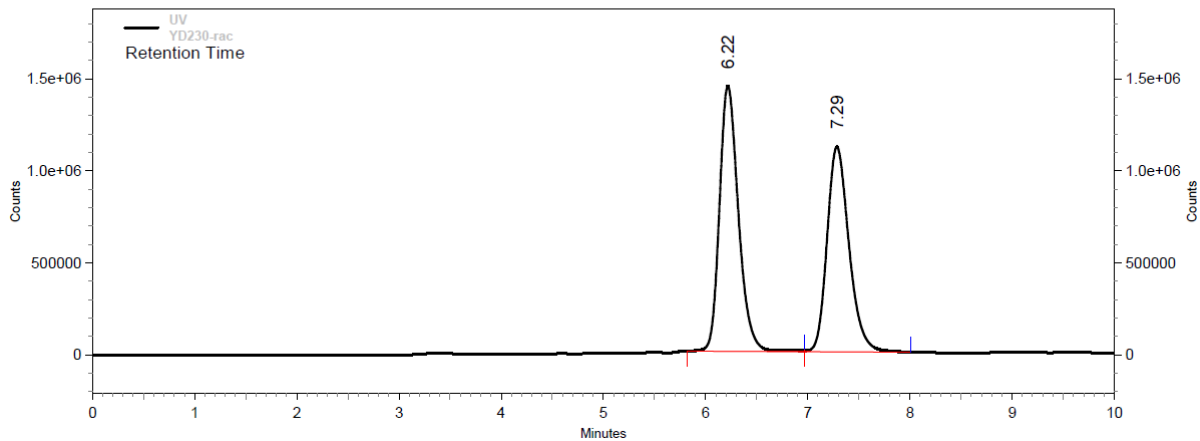

UV Results

| Retention Time | Area     | Area % | Capacity factor | Relative RT | Resolution (USP) |
|----------------|----------|--------|-----------------|-------------|------------------|
| 6.22           | 18619485 | 52.80  | 1.07            | 1.00        | 0.00             |
| 7.29           | 16644418 | 47.20  | 1.43            | 1.33        | 2.94             |

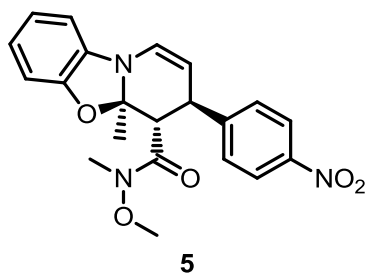

Sample : IIIHD343-dia

Method description : Chiralpak AD-H, Heptane/Isopropanol 80/20, 1 ml/min, UV 254 nm et CD254nm

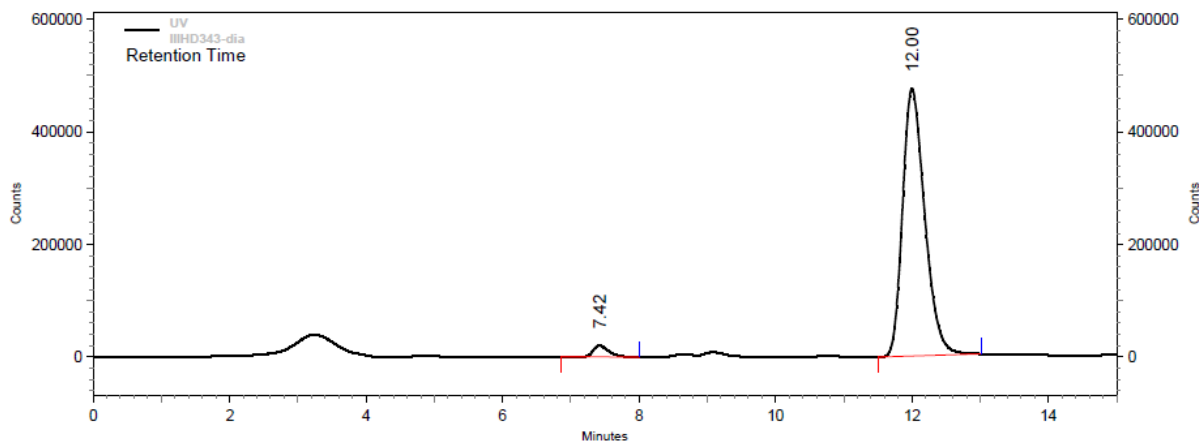

| UV Results     |          |        |                 |             |                  |  |
|----------------|----------|--------|-----------------|-------------|------------------|--|
| Retention Time | Area     | Area % | Capacity factor | Relative RT | Resolution (USP) |  |
| 7.42           | 323863   | 2.93   | 1.47            | 0.00        | 0.00             |  |
| 12.00          | 10733675 | 97.07  | 3.00            | 0.00        | 9.01             |  |

Sample : IIIHD340

Method description : Chiralpak AD-H, Heptane/Isopropanol 80/20, 1 ml/min, UV 254 nm et CD254nm

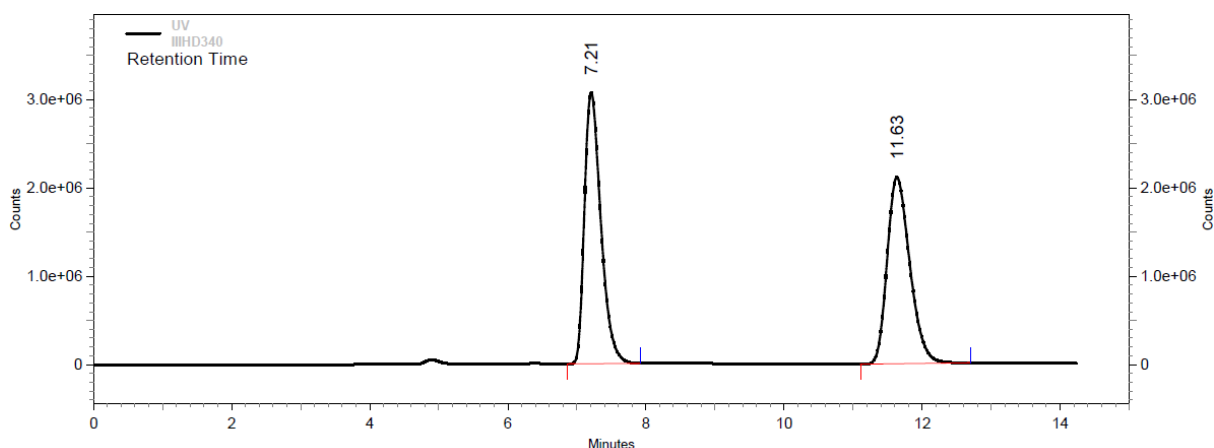

| UV Results     |          |        |                 |             |                  |  |
|----------------|----------|--------|-----------------|-------------|------------------|--|
| Retention Time | Area     | Area % | Capacity factor | Relative RT | Resolution (USP) |  |
| 7.21           | 50702065 | 51.26  | 1.40            | 0.00        | 0.00             |  |
| 11.63          | 48217051 | 48.74  | 2.88            | 0.00        | 8.50             |  |

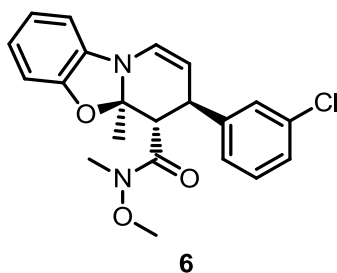

Sample : YD377

Method description : Chiralpak ID, Heptane/Ethanol 95/5, 1 ml/min, DAD and CD 254nm

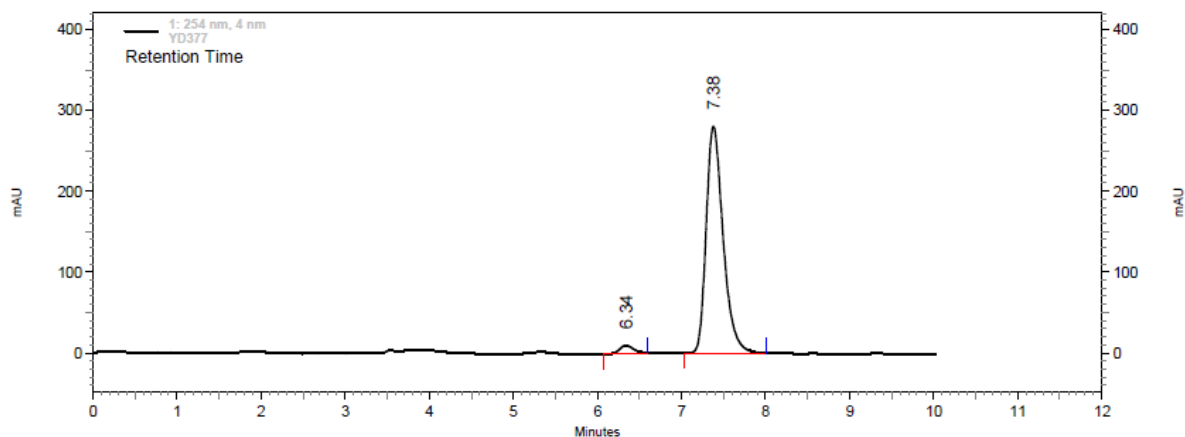

| Retention Time | Area     | Area % | Capacity factor | Relative RT | Resolution (USP) |
|----------------|----------|--------|-----------------|-------------|------------------|
| 6.34           | 508786   | 3.16   | 1.11            | 0.00        | 0.00             |
| 7.38           | 15612443 | 96.84  | 1.46            | 0.00        | 3.05             |

Sample : YD376-rac

Method description : Chiralpak ID, Heptane/Ethanol 95/5, 1 ml/min, DAD and CD 254nm

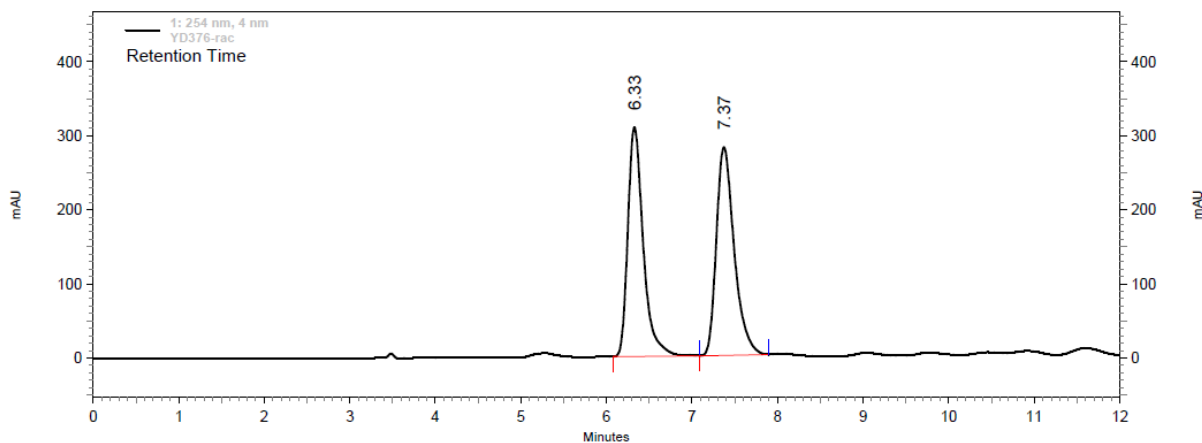

| Retention Time | Area     | Area % | Capacity factor | Relative RT | Resolution (USP) |
|----------------|----------|--------|-----------------|-------------|------------------|
| 6.33           | 15521471 | 48.82  | 1.11            | 0.00        | 0.00             |
| 7.37           | 16269612 | 51.18  | 1.46            | 0.00        | 3.01             |



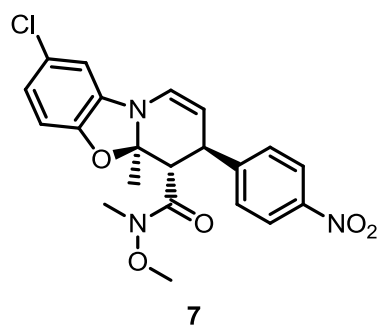

Sample : YD168

Method description : Chiralcel OD-3, Heptane/Isopropanol 80/20, 1 ml/min, UV 254 nm et polarimetre

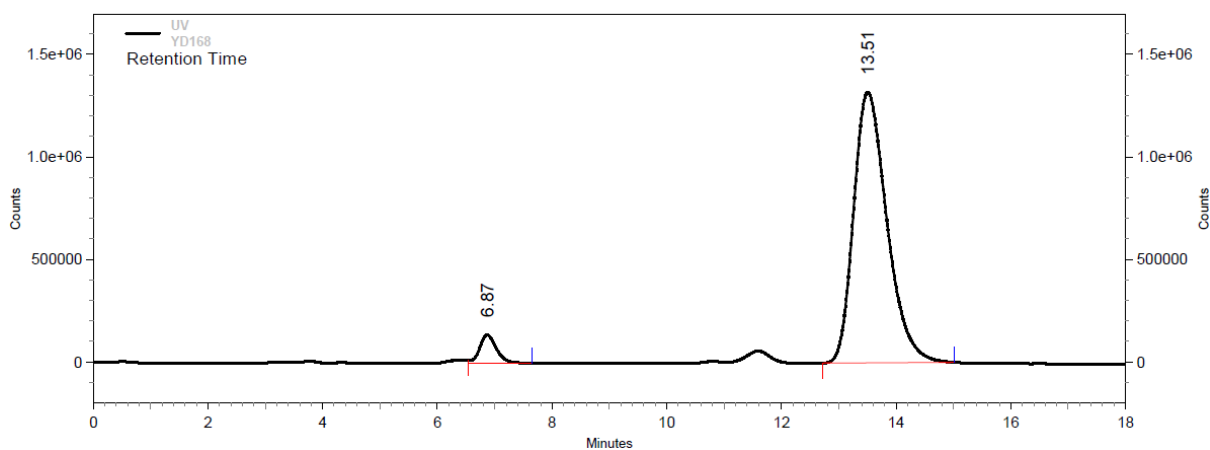

UV Results

| Retention Time | Area     | Area % | Capacity factor | Relative RT | Resolution (USP) |
|----------------|----------|--------|-----------------|-------------|------------------|
| 6.87           | 2788172  | 4.97   | 1.29            | 0.00        | 0.00             |
| 13.51          | 53296644 | 95.03  | 3.50            | 0.00        | 8.36             |

Sample : YD147-OD-3

Method description : Chiralcel OD-3, Heptane/Isopropanol 80/20, 1 ml/min, UV 254 nm et polarimetre

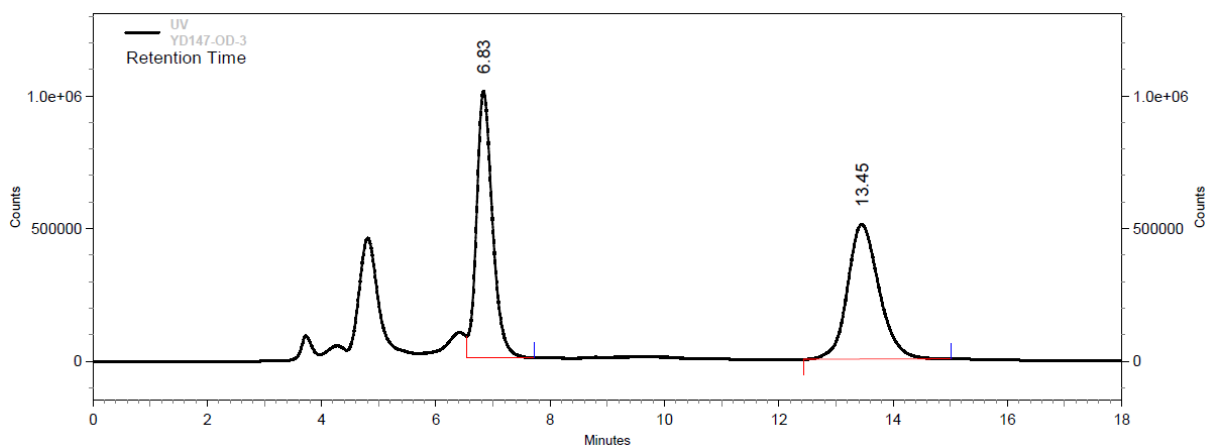

UV Results

| Retention Time | Area     | Area % | Capacity factor | Relative RT | Resolution (USP) |
|----------------|----------|--------|-----------------|-------------|------------------|
| 6.83           | 19426753 | 49.98  | 1.28            | 0.00        | 0.00             |
| 13.45          | 19445742 | 50.02  | 3.48            | 0.00        | 8.82             |

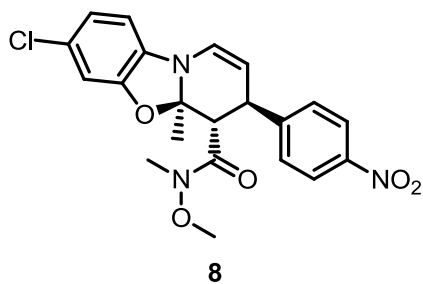

Sample : YD167

Method description : Chiralpak AD-H, Heptane/Isopropanol 80/20, 1 ml/min, UV 254 nm et CD254nm

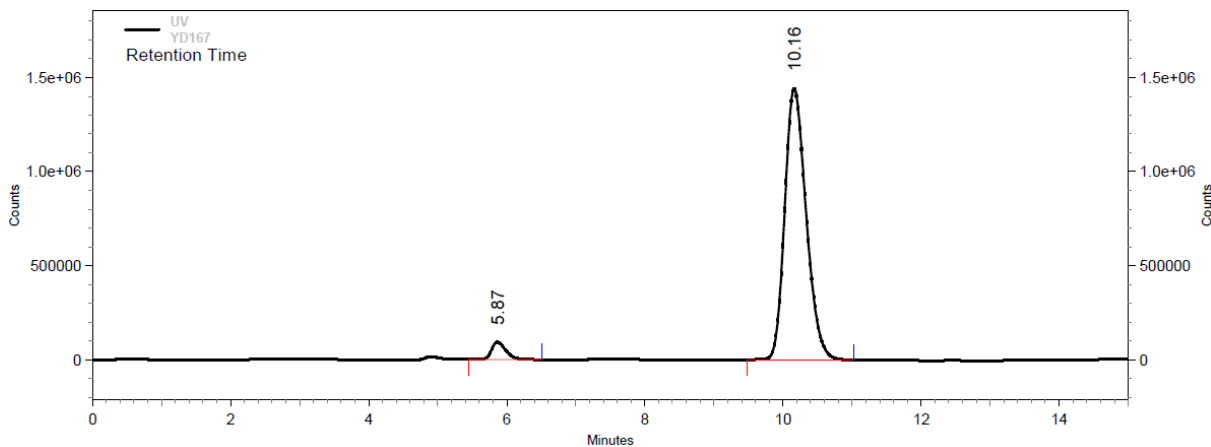

UV Results

| Retention Time | Area     | Area % | Capacity factor | Relative RT | Resolution (USP) |
|----------------|----------|--------|-----------------|-------------|------------------|
| 5.87           | 1322019  | 4.08   | 0.96            | 0.00        | 0.00             |
| 10.16          | 31114321 | 95.92  | 2.39            | 0.00        | 9.01             |

Sample : YD146-AD-H

Method description : Chiralpak AD-H, Heptane/Isopropanol 80/20, 1 ml/min, UV 254 nm et CD254nm

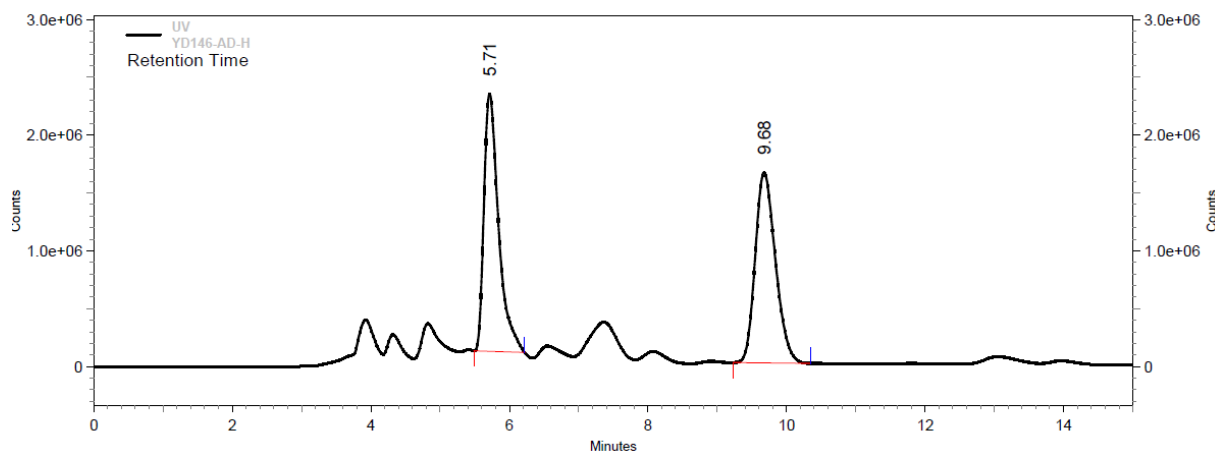

UV Results

| Retention Time | Area     | Area % | Capacity factor | Relative RT | Resolution (USP) |
|----------------|----------|--------|-----------------|-------------|------------------|
| 5.71           | 32700319 | 49.43  | 0.90            | 0.00        | 0.00             |
| 9.68           | 33459187 | 50.57  | 2.23            | 0.00        | 8.61             |

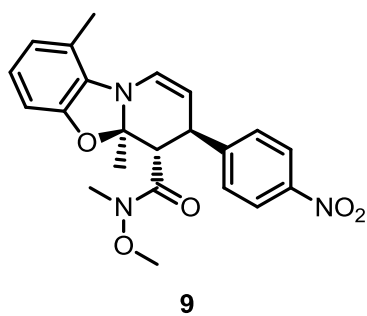

Sample : YD169

Method description : Lux-Cellulose-4, Heptane/Isopropanol 80/20, 1 ml/min, UV 254 nm et CD254nm

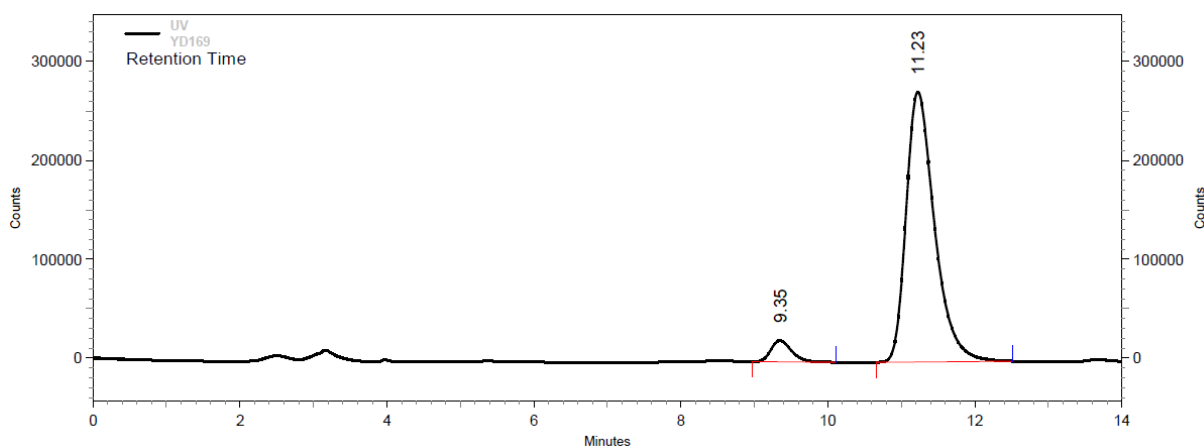

UV Results

| Retention Time | Area    | Area % | Capacity factor | Relative RT | Resolution (USP) |
|----------------|---------|--------|-----------------|-------------|------------------|
| 9.35           | 418129  | 5.40   | 2.12            | 1.00        | 0.00             |
| 11.23          | 7320720 | 94.60  | 2.74            | 1.30        | 3.09             |

Sample : YD134

Method description : Lux-Cellulose-4, Heptane/Isopropanol 80/20, 1 ml/min, UV 254 nm et CD254nm

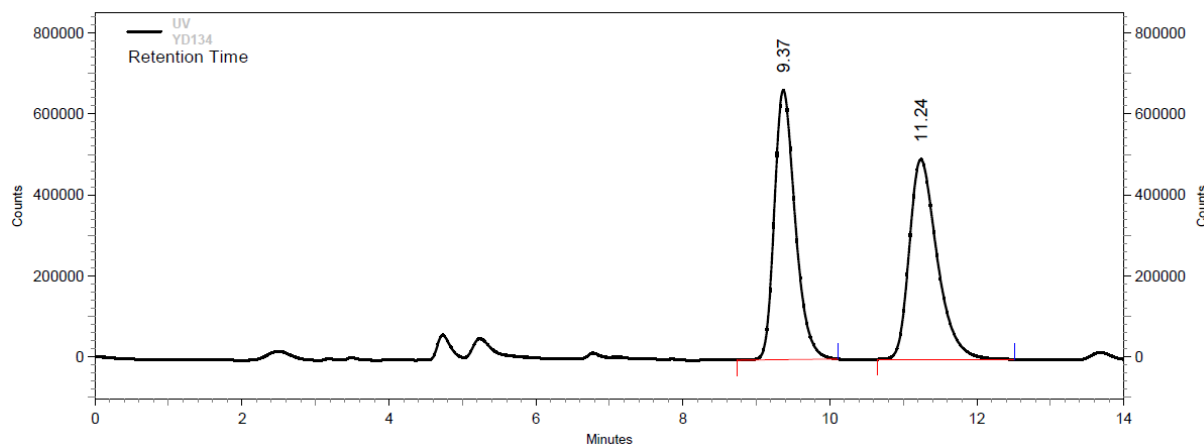

UV Results

| Retention Time | Area     | Area % | Capacity factor | Relative RT | Resolution (USP) |
|----------------|----------|--------|-----------------|-------------|------------------|
| 9.37           | 13107639 | 50.19  | 2.12            | 1.00        | 0.00             |
| 11.24          | 13008293 | 49.81  | 2.75            | 1.29        | 3.10             |

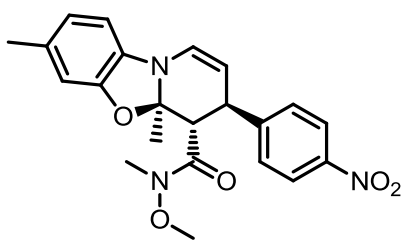

10

Sample : YD194

Method description : Chiralpak IF, Heptane/Ethanol 80/20, 1 ml/min, DAD and CD254nm

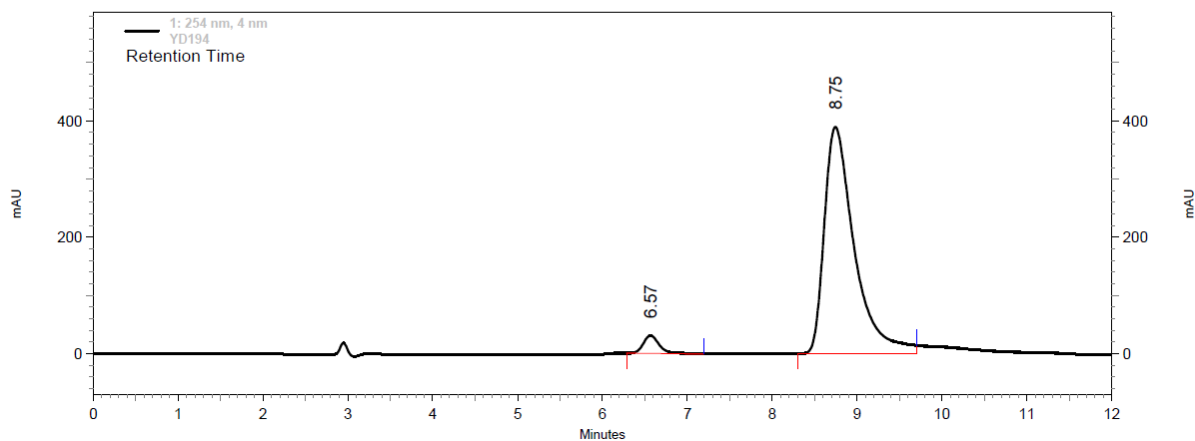

Results

| Retention Time | Area     | Area % | Capacity factor | Relative RT | Resolution (USP) |
|----------------|----------|--------|-----------------|-------------|------------------|
| 6.57           | 1632305  | 4.08   | 1.19            | 0.00        | 0.00             |
| 8.75           | 38395135 | 95.92  | 1.92            | 0.00        | 4.62             |

Sample : YD193

Method description : Chiralpak IF, Heptane/Ethanol 80/20, 1 ml/min, DAD and CD254nm

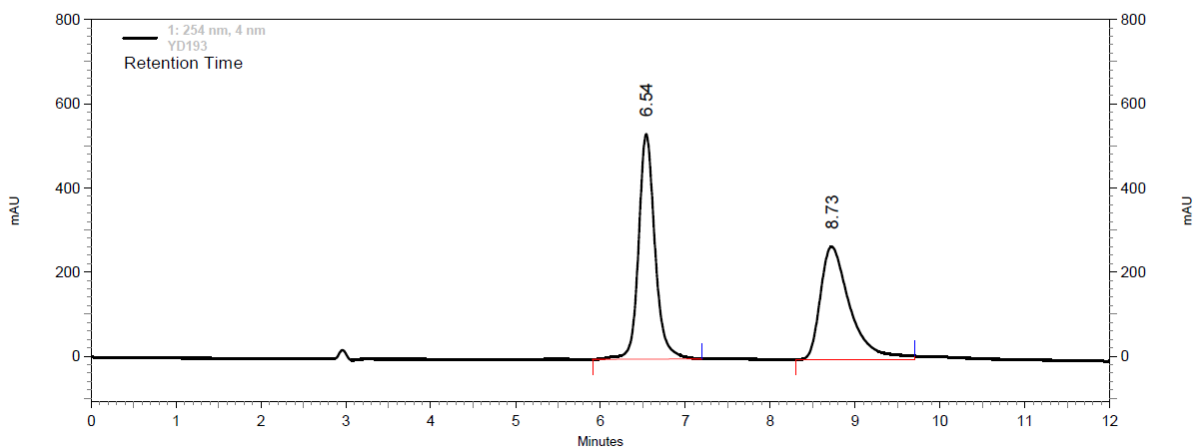

Results

| Retention Time | Area     | Area % | Capacity factor | Relative RT | Resolution (USP) |
|----------------|----------|--------|-----------------|-------------|------------------|
| 6.54           | 28751044 | 52.36  | 1.18            | 0.00        | 0.00             |
| 8.73           | 26161838 | 47.64  | 1.91            | 0.00        | 4.62             |

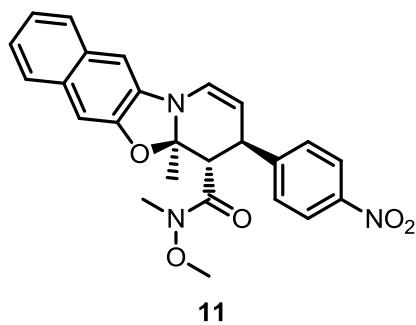

Sample : YD171

Method description : Chiralpak IA, Heptane/Ethanol 80/20, 1 ml/min, DAD and CD254nm

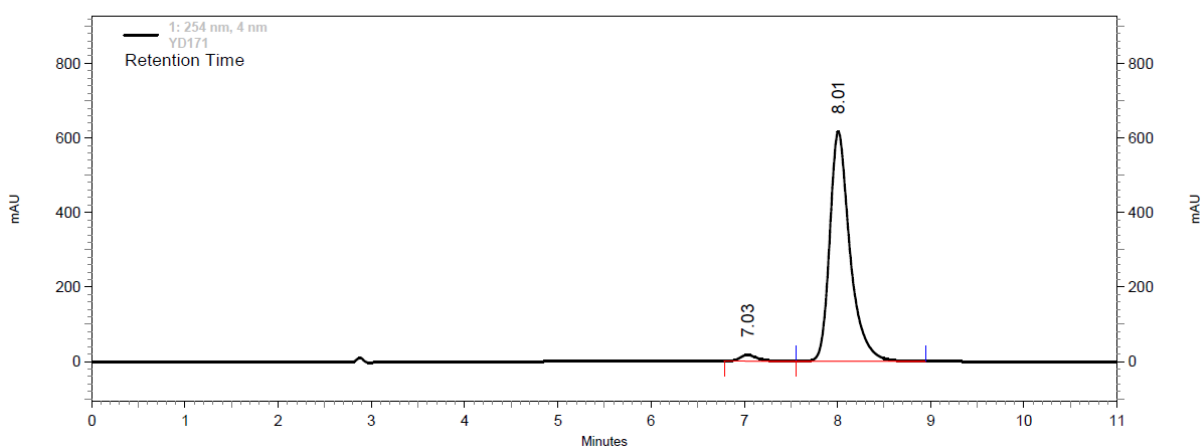

| Results        |          |        |                 |             |                  |  |
|----------------|----------|--------|-----------------|-------------|------------------|--|
| Retention Time | Area     | Area % | Capacity factor | Relative RT | Resolution (USP) |  |
| 7.03           | 865640   | 2.28   | 1.34            | 0.00        | 0.00             |  |
| 8.01           | 37178774 | 97.72  | 1.67            | 0.00        | 2.70             |  |

Sample : YD192

Method description : Chiralpak IA, Heptane/Ethanol 80/20, 1 ml/min, DAD and CD254nm

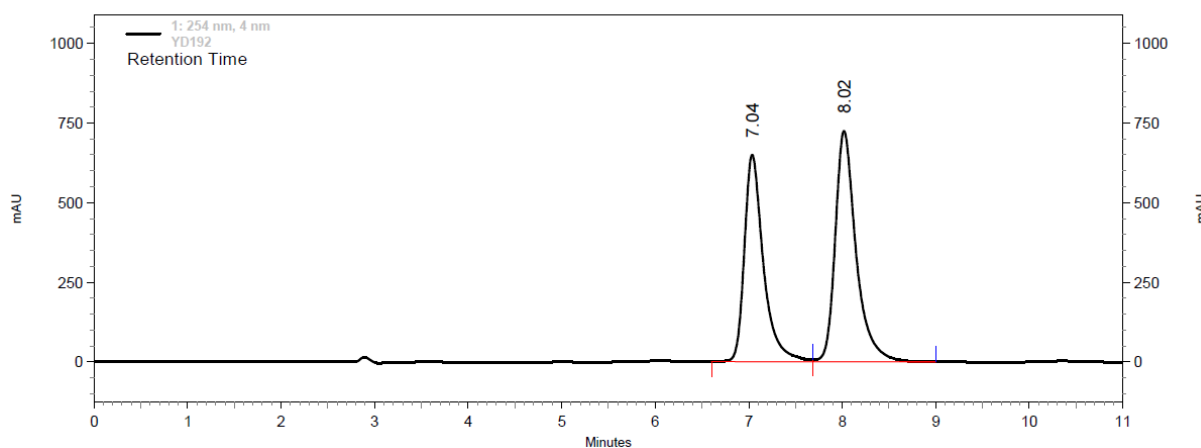

| Results        |          |        |                 |             |                  |  |
|----------------|----------|--------|-----------------|-------------|------------------|--|
| Retention Time | Area     | Area % | Capacity factor | Relative RT | Resolution (USP) |  |
| 7.04           | 36926333 | 45.08  | 1.35            | 0.00        | 0.00             |  |
| 8.02           | 44994629 | 54.92  | 1.67            | 0.00        | 2.63             |  |

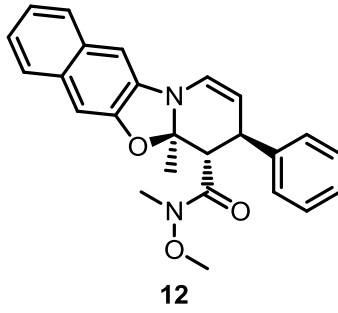

Sample : YD235

Method description : Chiralpak AZ-H, Heptane/Isopropanol 95/5, 1 ml/min, UV 254 nm et CD254nm

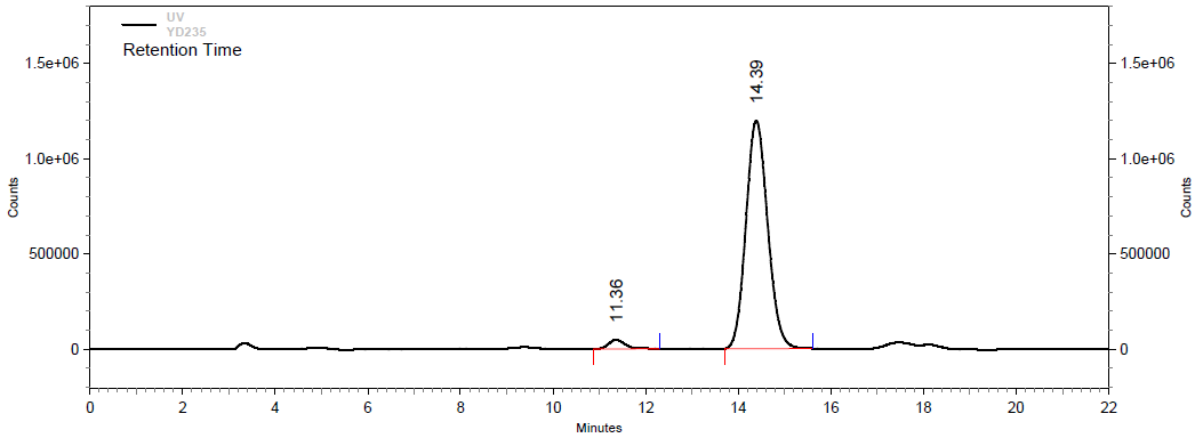

| UV Results     |          |        |                 |             |                  |  |
|----------------|----------|--------|-----------------|-------------|------------------|--|
| Retention Time | Area     | Area % | Capacity factor | Relative RT | Resolution (USP) |  |
| 11.36          | 1221790  | 3.04   | 2.79            | 0.00        | 0.00             |  |
| 14.39          | 39019274 | 96.96  | 3.80            | 0.00        | 3.97             |  |

Sample : YD234

Method description : Chiralpak AZ-H, Heptane/Isopropanol 95/5, 1 ml/min, UV 254 nm et CD254nm

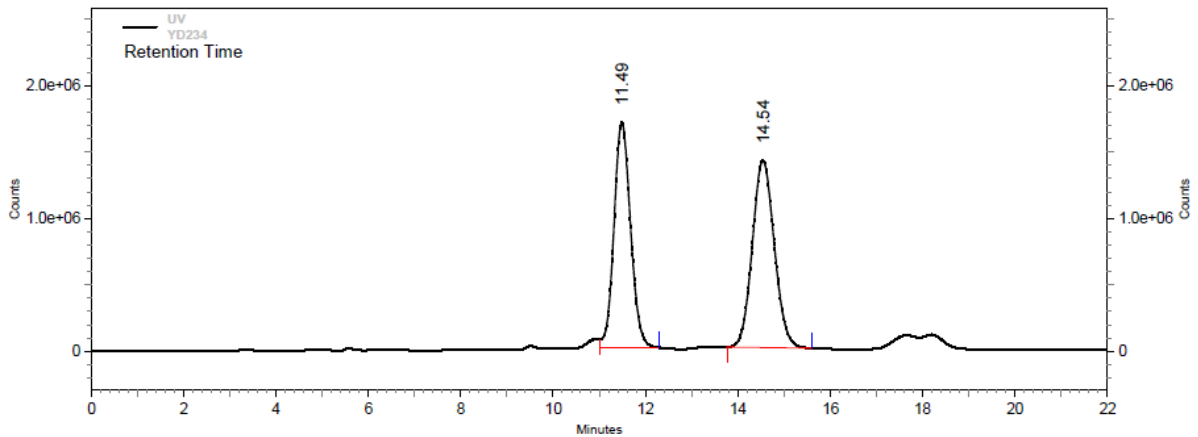

| Retention Time | Area    | Area % | Capacity factor | Relative RT | Resolution (USP) |  |
|----------------|---------|--------|-----------------|-------------|------------------|--|
| 11.78          | 3447808 | 48.69  | 0.00            | 0.00        |                  |  |
| 14.85          | 3632647 | 51.31  | 0.00            | 0.00        |                  |  |

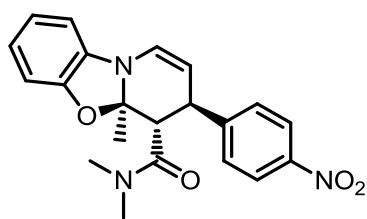

13

Sample : YD195

Method description : Chiralpak IA, Heptane/Ethanol 80/20, 1 ml/min, DAD and CD254nm

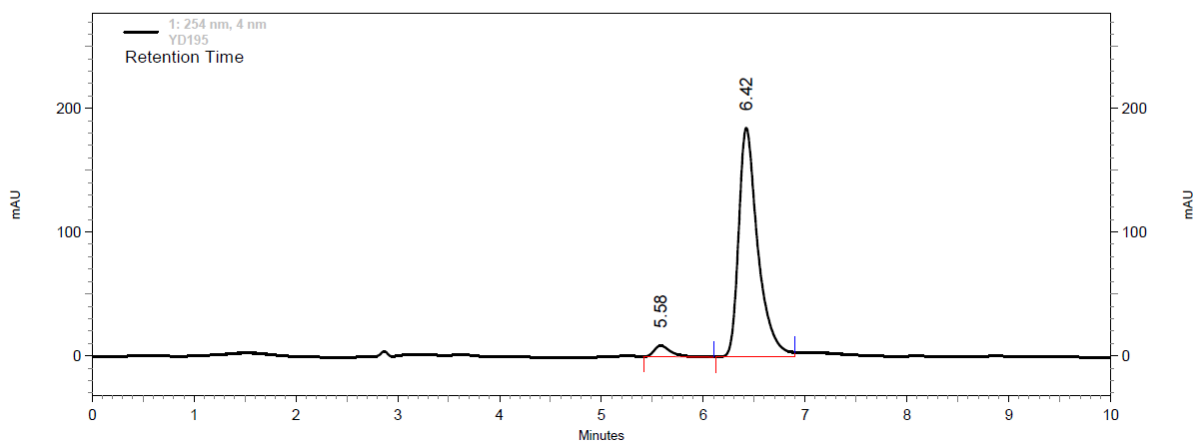

| Retention Time | Area    | Area % | Capacity factor | Relative RT | Resolution (USP) |
|----------------|---------|--------|-----------------|-------------|------------------|
| 5.58           | 404406  | 4.00   | 0.86            | 0.00        | 0.00             |
| 6.42           | 9700608 | 96.00  | 1.14            | 0.00        | 2.74             |

Sample : YD208-rac

Method description : Chiralpak IA, Heptane/Ethanol 80/20, 1 ml/min, DAD and CD254nm

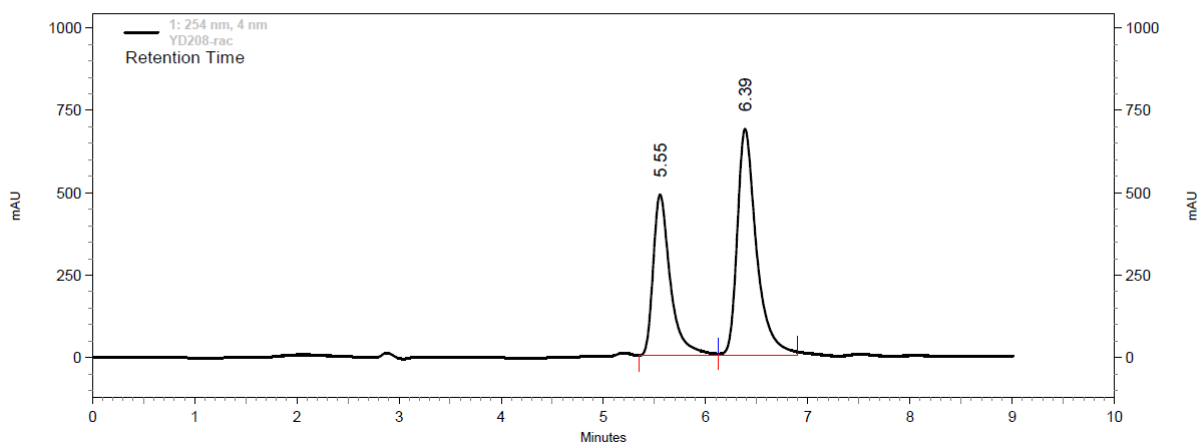

| Retention Time | Area     | Area % | Capacity factor | Relative RT | Resolution (USP) |
|----------------|----------|--------|-----------------|-------------|------------------|
| 5.55           | 22987213 | 38.90  | 0.85            | 0.00        | 0.00             |
| 6.39           | 36098398 | 61.10  | 1.13            | 0.00        | 2.69             |

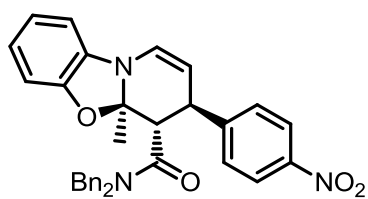

14

Sample : YD196

Method description : Chiralpak IA, Heptane/Ethanol 80/20, 1 ml/min, DAD and CD254nm

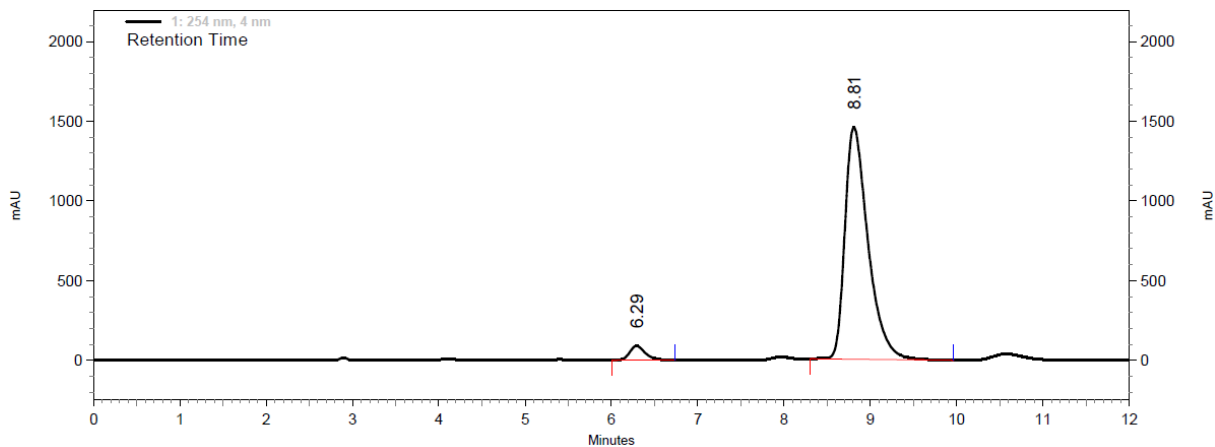

Results

| Retention Time | Area      | Area % | Capacity factor | Relative RT | Resolution (USP) |
|----------------|-----------|--------|-----------------|-------------|------------------|
| 6.29           | 4467326   | 3.95   | 1.10            | 0.00        | 0.00             |
| 8.81           | 108656143 | 96.05  | 1.94            | 0.00        | 6.22             |

Sample : YD179-IA

Method description : Chiralpak IA, Heptane/Ethanol 80/20, 1 ml/min, DAD and CD254nm

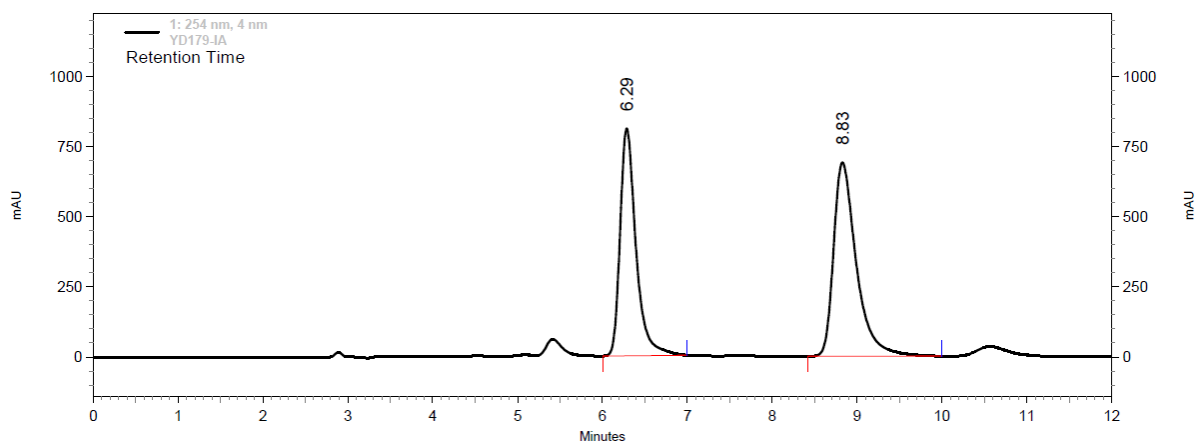

Results

| Retention Time | Area     | Area % | Capacity factor | Relative RT | Resolution (USP) |
|----------------|----------|--------|-----------------|-------------|------------------|
| 6.29           | 42105236 | 44.98  | 1.10            | 0.00        | 0.00             |
| 8.83           | 51507250 | 55.02  | 1.94            | 0.00        | 6.36             |



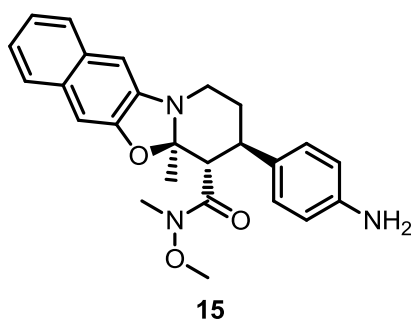

Sample : YD222

Method description : Lux-Cellulose-4, Heptane/ethanol 80/20, 1 ml/min, UV 254 nm et polarimetre

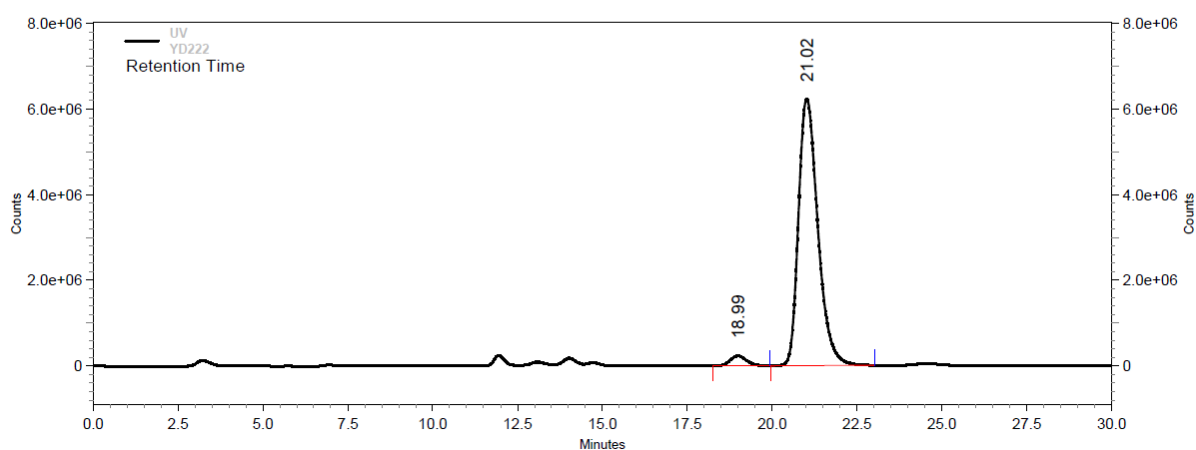

UV Results

| Retention Time | Area      | Area % | Capacity factor | Relative RT | Resolution (USP) |
|----------------|-----------|--------|-----------------|-------------|------------------|
| 18.99          | 7689178   | 3.02   | 5.33            | 1.00        | 0.00             |
| 21.02          | 247155788 | 96.98  | 6.01            | 1.13        | 2.12             |

Sample : YD225-rac-LuxC4

Method description : Lux-Cellulose-4, Heptane/ethanol 80/20, 1 ml/min, UV 254 nm et polarimetre

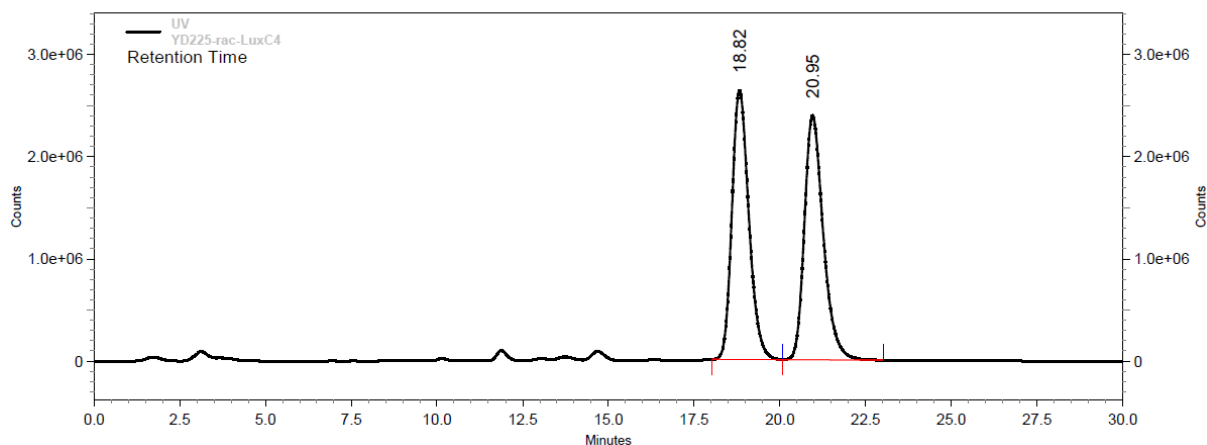

UV Results

| Retention Time | Area     | Area % | Capacity factor | Relative RT | Resolution (USP) |
|----------------|----------|--------|-----------------|-------------|------------------|
| 18.82          | 90400327 | 49.59  | 5.27            | 1.00        | 0.00             |
| 20.95          | 91906403 | 50.41  | 5.98            | 1.13        | 2.23             |

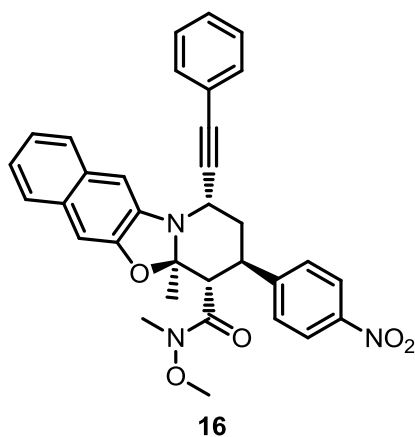

Sample : YD215

Method description : Lux-Cellulose-2, Heptane/ethanol 70/30, 1 ml/min, UV 254 nm et polarimetre

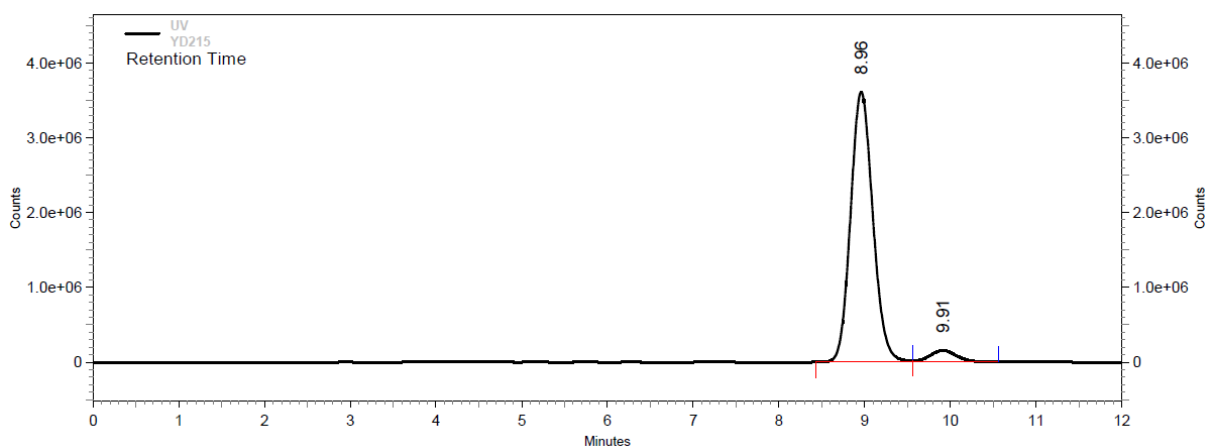

UV Results

| Retention Time | Area     | Area % | Capacity factor | Relative RT | Resolution (USP) |
|----------------|----------|--------|-----------------|-------------|------------------|
| 8.96           | 65169253 | 95.02  | 1.99            | 1.00        | 0.00             |
| 9.91           | 3418247  | 4.98   | 2.30            | 1.16        | 1.79             |

Sample : YD231

Method description : Lux-Cellulose-2, Heptane/ethanol 70/30, 1 ml/min, UV 254 nm et polarimetre

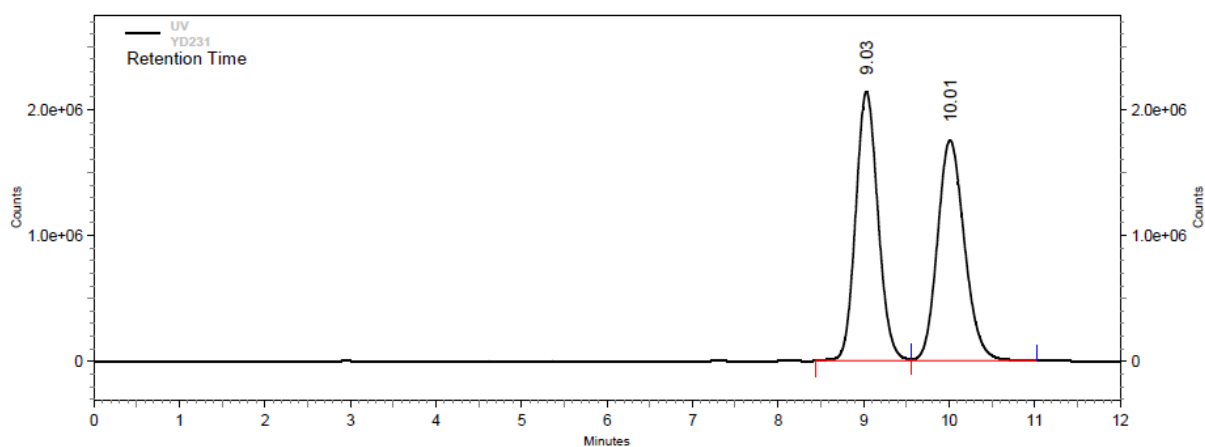

UV Results

| Retention Time | Area     | Area % | Capacity factor | Relative RT | Resolution (USP) |
|----------------|----------|--------|-----------------|-------------|------------------|
| 9.03           | 38846651 | 50.27  | 2.01            | 1.00        | 0.00             |
| 10.01          | 38435601 | 49.73  | 2.34            | 1.16        | 1.84             |
